# Supplementary material for: A series of N-trinitromethyl-substituted polynitro-pyrazoles: high-energy-density materials with positive oxygen balances
Source: Royal Society of Chemistry journal article supplement (doi:10.1039/d2ra06149j), 2022-01-01
Supplement: d2ra06149j1.pdf [file d2ra06149j1.pdf]

## Electronic Supplementary Information

### **A series of *N*-trinitromethyl-substituted polynitro-pyrazoles: high-energy-density materials with positive oxygen balances**

Lujia Ding,<sup>a</sup> Ruirong Ge,<sup>b</sup> Pengcheng Wang,<sup>a</sup> Dongxue Li,<sup>c</sup> Qiuhan Lin,<sup>a</sup> Ming Lu<sup>\*a</sup> and  
Yuangan Xu<sup>\*a</sup>

<sup>a</sup> School of Chemistry and Chemical Engineering, Nanjing University of Science and  
Technology, Nanjing 210094, China.

<sup>b</sup> *Anhui Hongxing Electrical Polytron Technologies Inc, Hefei 231135, Anhui, China.*

<sup>c</sup> China National Quality Inspection and Testing Center for Industrial Explosive Materials,  
Nanjing 210094, China.

\* Corresponding authors: [luming@njust.edu.cn](mailto:luming@njust.edu.cn) (M. L.); [yuanganxu@163.com](mailto:yuanganxu@163.com) (Y. X.)

## Table of Contents

|                                                                           |     |
|---------------------------------------------------------------------------|-----|
| 1. Single-crystal X-ray diffraction analysis of <b>2</b>                  | S1  |
| 2. Single-crystal X-ray diffraction analysis of <b>6</b>                  | S5  |
| 3. Single-crystal X-ray diffraction analysis of <b>7</b>                  | S8  |
| 4. Single-crystal X-ray diffraction analysis of <b>10</b>                 | S12 |
| 5. Single-crystal X-ray diffraction analysis of <b>11</b>                 | S16 |
| 6. Single-crystal X-ray diffraction analysis of <b>12</b>                 | S21 |
| 7. Single-crystal X-ray diffraction analysis of <b>13</b>                 | S24 |
| 8. Single-crystal X-ray diffraction analysis of <b>14</b>                 | S30 |
| 9. Single-crystal X-ray diffraction analysis of <b>15·2H<sub>2</sub>O</b> | S34 |
| 10. NMR spectra                                                           | S38 |
| 11. IR spectra                                                            | S45 |
| 12. General methods                                                       | S48 |
| References                                                                | S51 |

## 1. Single-crystal X-ray diffraction analysis of **2**

**Table S1.** Crystal data, data collection, and refinement for **2**

|                                                                                                                                                                                                                                                                                      |                                                                                                                                                     |
|--------------------------------------------------------------------------------------------------------------------------------------------------------------------------------------------------------------------------------------------------------------------------------------|-----------------------------------------------------------------------------------------------------------------------------------------------------|
| $C_4H_5N_5O_4$                                                                                                                                                                                                                                                                       | $F(000) = 192$                                                                                                                                      |
| $M_r = 187.13$                                                                                                                                                                                                                                                                       | $D_x = 1.749 \text{ Mg m}^{-3}$                                                                                                                     |
| Monoclinic, $Pc$                                                                                                                                                                                                                                                                     | Mo $K\alpha$ radiation, $\lambda = 0.71073 \text{ \AA}$                                                                                             |
| $a = 4.0966 (8) \text{ \AA}$                                                                                                                                                                                                                                                         | Cell parameters from 1157 reflections                                                                                                               |
| $b = 12.015 (2) \text{ \AA}$                                                                                                                                                                                                                                                         | $\theta = 3.3\text{--}23.5^\circ$                                                                                                                   |
| $c = 7.3348 (15) \text{ \AA}$                                                                                                                                                                                                                                                        | $\mu = 0.16 \text{ mm}^{-1}$                                                                                                                        |
| $\beta = 100.207 (6)^\circ$                                                                                                                                                                                                                                                          | $T = 170 \text{ K}$                                                                                                                                 |
| $V = 355.30 (12) \text{ \AA}^3$                                                                                                                                                                                                                                                      | Block, colourless                                                                                                                                   |
| $Z = 2$                                                                                                                                                                                                                                                                              | $0.15 \times 0.08 \times 0.03 \text{ mm}$                                                                                                           |
| Bruker D8 VENTURE diffractometer                                                                                                                                                                                                                                                     | 990 reflections with $I > 2\sigma(I)$                                                                                                               |
| $\phi$ and $\omega$ scans                                                                                                                                                                                                                                                            | $R_{\text{int}} = 0.069$                                                                                                                            |
| Absorption correction: multi-scan <i>SADABS2016/2</i> (Bruker,2016/2) was used for absorption correction. $wR2(\text{int})$ was 0.1117 before and 0.0579 after correction. The Ratio of minimum to maximum transmission is 0.8623. The $\lambda/2$ correction factor is Not present. | $\theta_{\text{max}} = 27.7^\circ$ , $\theta_{\text{min}} = 3.3^\circ$                                                                              |
| $T_{\text{min}} = 0.643$ , $T_{\text{max}} = 0.746$                                                                                                                                                                                                                                  | $h = -5 \rightarrow 5$                                                                                                                              |
| 4326 measured reflections                                                                                                                                                                                                                                                            | $k = -15 \rightarrow 15$                                                                                                                            |
| 1482 independent reflections                                                                                                                                                                                                                                                         | $l = -9 \rightarrow 9$                                                                                                                              |
| Refinement on $F^2$                                                                                                                                                                                                                                                                  | Hydrogen site location: inferred from neighbouring sites                                                                                            |
| Least-squares matrix: full                                                                                                                                                                                                                                                           | H-atom parameters constrained                                                                                                                       |
| $R[F^2 > 2\sigma(F^2)] = 0.051$                                                                                                                                                                                                                                                      | $w = 1/[\sigma^2(F_o^2) + (0.0422P)^2 + 0.1338P]$<br>where $P = (F_o^2 + 2F_c^2)/3$                                                                 |
| $wR(F^2) = 0.121$                                                                                                                                                                                                                                                                    | $(\Delta/\sigma)_{\text{max}} = 0.002$                                                                                                              |
| $S = 1.04$                                                                                                                                                                                                                                                                           | $\Delta_{\text{max}} = 0.27 \text{ e \AA}^{-3}$                                                                                                     |
| 1482 reflections                                                                                                                                                                                                                                                                     | $\Delta_{\text{min}} = -0.29 \text{ e \AA}^{-3}$                                                                                                    |
| 119 parameters                                                                                                                                                                                                                                                                       | Absolute structure: Flack $x$ determined using 340 quotients $[(I+)-(I-)]/[(I+)+(I-)]$ (Parsons, Flack and Wagner, Acta Cryst. B69 (2013) 249-259). |
| 2 restraints                                                                                                                                                                                                                                                                         | Absolute structure parameter: -1.3 (10)                                                                                                             |
| Primary atom site location: dual                                                                                                                                                                                                                                                     |                                                                                                                                                     |

**Table S2.** Fractional atomic coordinates and isotropic or equivalent isotropic displacement parameters ( $\text{\AA}^2$ ) for **2**

|     | <i>x</i>    | <i>y</i>   | <i>z</i>   | $U_{\text{iso}}^*/U_{\text{eq}}$ |
|-----|-------------|------------|------------|----------------------------------|
| O4  | 0.8898 (10) | 0.5532 (3) | 0.6568 (6) | 0.0343 (11)                      |
| O3  | 0.4836 (10) | 0.4601 (3) | 0.4898 (6) | 0.0364 (11)                      |
| O2  | 0.5189 (12) | 0.9895 (3) | 0.3955 (6) | 0.0424 (12)                      |
| O1  | 0.0841 (11) | 0.9570 (3) | 0.1843 (6) | 0.0438 (13)                      |
| N5  | 0.1447 (12) | 0.7386 (4) | 0.2440 (6) | 0.0280 (12)                      |
| N4  | 0.2275 (11) | 0.6409 (4) | 0.3187 (7) | 0.0262 (12)                      |
| H4  | 0.131485    | 0.577980   | 0.277612   | 0.031*                           |
| N1  | 0.3125 (12) | 0.9263 (4) | 0.3044 (7) | 0.0333 (14)                      |
| N3  | 0.6240 (10) | 0.5488 (4) | 0.5439 (6) | 0.0262 (12)                      |
| N2  | 0.7849 (12) | 0.8134 (4) | 0.6261 (7) | 0.0301 (12)                      |
| H2  | 0.857745    | 0.878317   | 0.594983   | 0.036*                           |
| C1  | 0.3467 (14) | 0.8095 (4) | 0.3484 (8) | 0.0241 (13)                      |
| C3  | 0.4814 (13) | 0.6482 (4) | 0.4682 (7) | 0.0222 (13)                      |
| C2  | 0.5670 (14) | 0.7606 (5) | 0.4977 (7) | 0.0232 (12)                      |
| C4  | 0.9132 (15) | 0.7736 (5) | 0.8126 (8) | 0.0337 (15)                      |
| H4A | 1.112521    | 0.728777   | 0.811239   | 0.051*                           |
| H4B | 0.744413    | 0.727997   | 0.856422   | 0.051*                           |
| H4C | 0.968872    | 0.837359   | 0.895686   | 0.051*                           |

**Table S3.** Atomic displacement parameters ( $\text{\AA}^2$ ) for **2**

|    | $U^{11}$  | $U^{22}$  | $U^{33}$  | $U^{12}$     | $U^{13}$   | $U^{23}$     |
|----|-----------|-----------|-----------|--------------|------------|--------------|
| O4 | 0.033 (2) | 0.030 (2) | 0.036 (3) | 0.0083 (18)  | -0.004 (2) | 0.0023 (19)  |
| O3 | 0.041 (3) | 0.023 (2) | 0.044 (3) | -0.0045 (18) | 0.004 (2)  | -0.0001 (19) |
| O2 | 0.054 (3) | 0.026 (2) | 0.041 (3) | -0.008 (2)   | -0.009 (2) | 0.0011 (19)  |
| O1 | 0.053 (3) | 0.031 (2) | 0.039 (3) | 0.014 (2)    | -0.016 (3) | 0.003 (2)    |
| N5 | 0.028 (3) | 0.026 (3) | 0.028 (3) | 0.002 (2)    | -0.001 (2) | 0.000 (2)    |
| N4 | 0.030 (3) | 0.020 (2) | 0.027 (3) | -0.001 (2)   | -0.001 (2) | 0.000 (2)    |
| N1 | 0.040 (3) | 0.027 (3) | 0.030 (3) | 0.005 (2)    | -0.001 (3) | 0.001 (2)    |
| N3 | 0.027 (3) | 0.026 (3) | 0.025 (3) | 0.002 (2)    | 0.004 (3)  | 0.0028 (19)  |
| N2 | 0.031 (3) | 0.024 (2) | 0.030 (3) | -0.004 (2)   | -0.008 (2) | 0.002 (2)    |
| C1 | 0.025 (3) | 0.020 (3) | 0.026 (3) | 0.003 (2)    | 0.002 (3)  | -0.001 (2)   |
| C3 | 0.023 (3) | 0.020 (3) | 0.023 (3) | 0.003 (2)    | -0.001 (3) | -0.001 (2)   |
| C2 | 0.021 (3) | 0.028 (3) | 0.021 (3) | 0.001 (2)    | 0.003 (3)  | 0.002 (3)    |
| C4 | 0.038 (4) | 0.030 (3) | 0.029 (4) | -0.002 (3)   | -0.008 (3) | -0.001 (3)   |

**Table S4.** Geometric parameters (Å, °) for **2**

|          |           |            |           |
|----------|-----------|------------|-----------|
| O4—N3    | 1.247 (5) | N3—C3      | 1.400 (7) |
| O3—N3    | 1.243 (6) | N2—H2      | 0.8800    |
| O2—N1    | 1.240 (6) | N2—C2      | 1.337 (7) |
| O1—N1    | 1.223 (6) | N2—C4      | 1.456 (7) |
| N5—N4    | 1.314 (6) | C1—C2      | 1.417 (8) |
| N5—C1    | 1.331 (7) | C3—C2      | 1.403 (8) |
| N4—H4    | 0.8800    | C4—H4A     | 0.9800    |
| N4—C3    | 1.374 (7) | C4—H4B     | 0.9800    |
| N1—C1    | 1.441 (7) | C4—H4C     | 0.9800    |
|          |           |            |           |
| N4—N5—C1 | 104.1 (4) | N5—C1—C2   | 115.1 (5) |
| N5—N4—H4 | 123.9     | C2—C1—N1   | 126.9 (5) |
| N5—N4—C3 | 112.2 (4) | N4—C3—N3   | 117.7 (5) |
| C3—N4—H4 | 123.9     | N4—C3—C2   | 108.5 (5) |
| O2—N1—C1 | 116.5 (5) | N3—C3—C2   | 133.2 (5) |
| O1—N1—O2 | 124.4 (5) | N2—C2—C1   | 127.0 (5) |
| O1—N1—C1 | 119.1 (5) | N2—C2—C3   | 133.1 (5) |
| O4—N3—C3 | 118.8 (4) | C3—C2—C1   | 99.9 (5)  |
| O3—N3—O4 | 123.3 (5) | N2—C4—H4A  | 109.5     |
| O3—N3—C3 | 117.9 (4) | N2—C4—H4B  | 109.5     |
| C2—N2—H2 | 116.9     | N2—C4—H4C  | 109.5     |
| C2—N2—C4 | 126.2 (5) | H4A—C4—H4B | 109.5     |
| C4—N2—H2 | 116.9     | H4A—C4—H4C | 109.5     |
| N5—C1—N1 | 117.9 (5) | H4B—C4—H4C | 109.5     |

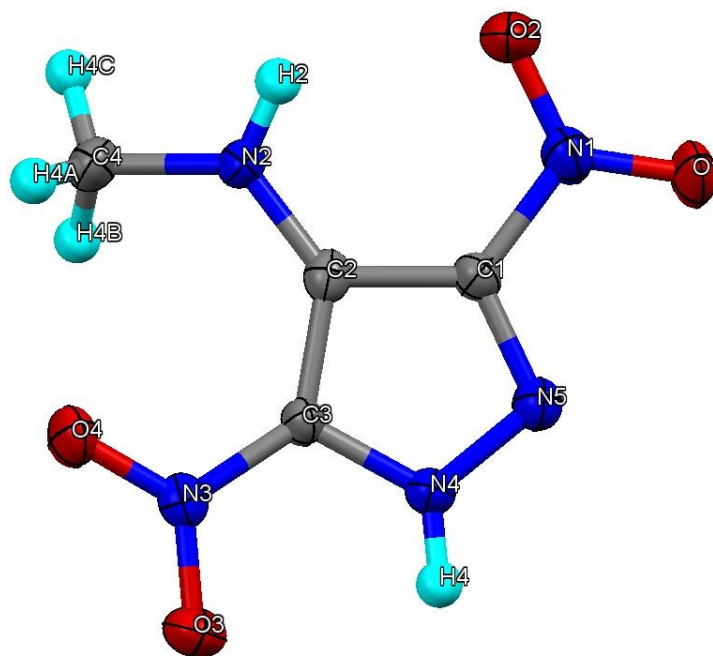

**Fig. S1** Crystal structure of **2**.

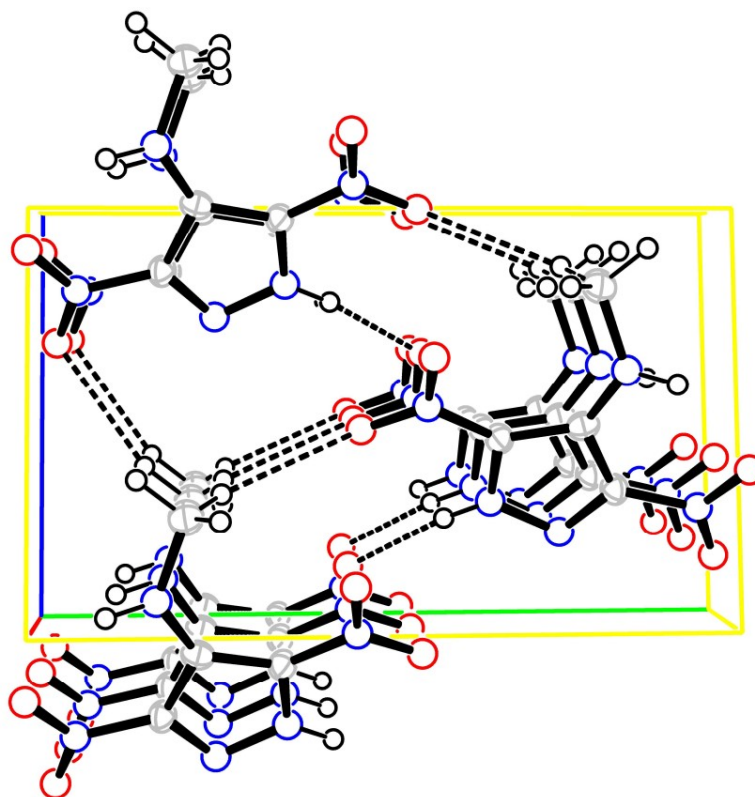

**Fig. S2** Packing diagram of **2**.

## 2. Single-crystal X-ray diffraction analysis of **6**

**Table S5.** Crystal data, data collection, and refinement for **6**

|                                                                                                                                                                                                                                                                                  |                                                                                   |
|----------------------------------------------------------------------------------------------------------------------------------------------------------------------------------------------------------------------------------------------------------------------------------|-----------------------------------------------------------------------------------|
| $C_6H_5ClN_4O_5$                                                                                                                                                                                                                                                                 | $F(000) = 504$                                                                    |
| $M_r = 248.59$                                                                                                                                                                                                                                                                   | $D_x = 1.774 \text{ Mg m}^{-3}$                                                   |
| Monoclinic, $P2_1/c$                                                                                                                                                                                                                                                             | Mo $K\alpha$ radiation, $\lambda = 0.71073 \text{ \AA}$                           |
| $a = 12.292 (3) \text{ \AA}$                                                                                                                                                                                                                                                     | Cell parameters from 613 reflections                                              |
| $b = 5.0976 (10) \text{ \AA}$                                                                                                                                                                                                                                                    | $\theta = 2.7\text{--}23.0^\circ$                                                 |
| $c = 14.985 (3) \text{ \AA}$                                                                                                                                                                                                                                                     | $\mu = 0.43 \text{ mm}^{-1}$                                                      |
| $\beta = 97.479 (6)^\circ$                                                                                                                                                                                                                                                       | $T = 173 \text{ K}$                                                               |
| $V = 931.0 (3) \text{ \AA}^3$                                                                                                                                                                                                                                                    | Block, colourless                                                                 |
| $Z = 4$                                                                                                                                                                                                                                                                          | $0.28 \times 0.15 \times 0.12 \text{ mm}$                                         |
| Bruker APEX-II CCD diffractometer                                                                                                                                                                                                                                                | 1492 reflections with $I > 2\sigma(I)$                                            |
| $\phi$ and $\omega$ scans                                                                                                                                                                                                                                                        | $R_{\text{int}} = 0.041$                                                          |
| Absorption correction: multi-scan <i>SADABS2014/5</i> (Bruker,2014/5) was used for absorption correction. $wR2(\text{int})$ was 0.0610 before and 0.0473 after correction. The Ratio of minimum to maximum transmission is 0.8967. The $\lambda/2$ correction factor is 0.00150. | $\theta_{\text{max}} = 26.4^\circ$ , $\theta_{\text{min}} = 1.7^\circ$            |
| $T_{\text{min}} = 0.668$ , $T_{\text{max}} = 0.745$                                                                                                                                                                                                                              | $h = -15 \rightarrow 15$                                                          |
| 5830 measured reflections                                                                                                                                                                                                                                                        | $k = -6 \rightarrow 6$                                                            |
| 1886 independent reflections                                                                                                                                                                                                                                                     | $l = -18 \rightarrow 18$                                                          |
| Refinement on $F^2$                                                                                                                                                                                                                                                              | Primary atom site location: dual                                                  |
| Least-squares matrix: full                                                                                                                                                                                                                                                       | Hydrogen site location: inferred from neighbouring sites                          |
| $R[F^2 > 2\sigma(F^2)] = 0.042$                                                                                                                                                                                                                                                  | H-atom parameters constrained                                                     |
| $wR(F^2) = 0.122$                                                                                                                                                                                                                                                                | $w = 1/[\sigma^2(F_o^2) + (0.061P)^2 + 0.328P]$<br>where $P = (F_o^2 + 2F_c^2)/3$ |
| $S = 1.06$                                                                                                                                                                                                                                                                       | $(\Delta/\sigma)_{\text{max}} < 0.001$                                            |
| 1886 reflections                                                                                                                                                                                                                                                                 | $\Delta_{\text{max}} = 0.28 \text{ e \AA}^{-3}$                                   |
| 146 parameters                                                                                                                                                                                                                                                                   | $\Delta_{\text{min}} = -0.29 \text{ e \AA}^{-3}$                                  |
| 0 restraints                                                                                                                                                                                                                                                                     |                                                                                   |

**Table S6.** Fractional atomic coordinates and isotropic or equivalent isotropic displacement parameters ( $\text{\AA}^2$ ) for **6**

|     | $x$          | $y$          | $z$          | $U_{\text{iso}}^*/U_{\text{eq}}$ |
|-----|--------------|--------------|--------------|----------------------------------|
| Cl1 | 0.35159 (6)  | 0.88010 (13) | 0.95203 (4)  | 0.0320 (2)                       |
| O5  | 0.58919 (15) | 0.3123 (4)   | 0.83730 (13) | 0.0311 (5)                       |

|     |              |            |              |            |
|-----|--------------|------------|--------------|------------|
| O4  | 0.57314 (16) | 0.6545 (4) | 0.92085 (13) | 0.0380 (5) |
| O1  | 0.15622 (17) | 0.6058 (4) | 0.62957 (13) | 0.0371 (5) |
| O2  | 0.05818 (15) | 0.4519 (4) | 0.81024 (15) | 0.0405 (5) |
| N2  | 0.26850 (16) | 0.3440 (4) | 0.77247 (14) | 0.0212 (5) |
| O3  | 0.11476 (17) | 0.8326 (4) | 0.86276 (14) | 0.0403 (5) |
| N4  | 0.53515 (17) | 0.4831 (4) | 0.86843 (14) | 0.0245 (5) |
| N3  | 0.37701 (16) | 0.3089 (4) | 0.78103 (13) | 0.0215 (5) |
| N1  | 0.13005 (18) | 0.6151 (4) | 0.83291 (14) | 0.0264 (5) |
| C5  | 0.3370 (2)   | 0.6401 (5) | 0.87315 (15) | 0.0215 (5) |
| C4  | 0.2423 (2)   | 0.5430 (5) | 0.82599 (16) | 0.0220 (5) |
| C6  | 0.4177 (2)   | 0.4827 (5) | 0.84230 (16) | 0.0206 (5) |
| C3  | 0.2016 (2)   | 0.1977 (5) | 0.70151 (16) | 0.0224 (5) |
| H3A | 0.1384       | 0.1187     | 0.7264       | 0.027*     |
| H3B | 0.2458       | 0.0533     | 0.6807       | 0.027*     |
| C2  | 0.1596 (2)   | 0.3699 (5) | 0.62207 (17) | 0.0240 (6) |
| C1  | 0.1232 (2)   | 0.2255 (6) | 0.53699 (18) | 0.0337 (7) |
| H1A | 0.0677       | 0.3291     | 0.4995       | 0.051*     |
| H1B | 0.0917       | 0.0562     | 0.5511       | 0.051*     |
| H1C | 0.1862       | 0.1961     | 0.5044       | 0.051*     |

**Table S7.** Atomic displacement parameters ( $\text{\AA}^2$ ) for **6**

|     | $U^{11}$    | $U^{22}$    | $U^{33}$    | $U^{12}$     | $U^{13}$     | $U^{23}$     |
|-----|-------------|-------------|-------------|--------------|--------------|--------------|
| Cl1 | 0.0426 (4)  | 0.0283 (4)  | 0.0240 (3)  | 0.0025 (3)   | -0.0001 (3)  | -0.0090 (3)  |
| O5  | 0.0221 (10) | 0.0336 (11) | 0.0371 (11) | 0.0018 (8)   | 0.0020 (8)   | -0.0039 (9)  |
| O4  | 0.0323 (11) | 0.0417 (12) | 0.0378 (11) | -0.0085 (9)  | -0.0036 (9)  | -0.0155 (9)  |
| O1  | 0.0488 (13) | 0.0230 (11) | 0.0368 (11) | -0.0035 (9)  | -0.0045 (10) | 0.0010 (9)   |
| O2  | 0.0215 (10) | 0.0461 (13) | 0.0537 (13) | 0.0007 (10)  | 0.0044 (9)   | -0.0037 (11) |
| N2  | 0.0181 (11) | 0.0210 (11) | 0.0235 (10) | -0.0004 (9)  | -0.0013 (8)  | -0.0019 (8)  |
| O3  | 0.0400 (12) | 0.0357 (12) | 0.0456 (12) | 0.0143 (10)  | 0.0071 (10)  | -0.0097 (10) |
| N4  | 0.0239 (11) | 0.0255 (12) | 0.0233 (11) | -0.0030 (10) | -0.0001 (9)  | -0.0005 (9)  |
| N3  | 0.0193 (11) | 0.0223 (11) | 0.0221 (10) | -0.0014 (9)  | -0.0002 (9)  | -0.0020 (9)  |
| N1  | 0.0237 (12) | 0.0329 (13) | 0.0225 (11) | 0.0069 (11)  | 0.0030 (9)   | 0.0042 (10)  |
| C5  | 0.0279 (14) | 0.0188 (12) | 0.0176 (11) | -0.0006 (11) | 0.0017 (10)  | -0.0005 (10) |
| C4  | 0.0223 (13) | 0.0227 (13) | 0.0209 (12) | 0.0029 (11)  | 0.0020 (10)  | 0.0021 (10)  |
| C6  | 0.0200 (12) | 0.0208 (12) | 0.0200 (12) | -0.0026 (10) | -0.0011 (10) | 0.0008 (10)  |
| C3  | 0.0193 (13) | 0.0213 (13) | 0.0254 (12) | -0.0024 (10) | -0.0021 (10) | -0.0025 (10) |
| C2  | 0.0203 (13) | 0.0245 (14) | 0.0270 (13) | -0.0042 (11) | 0.0028 (11)  | 0.0011 (11)  |
| C1  | 0.0390 (17) | 0.0338 (16) | 0.0264 (14) | -0.0069 (13) | -0.0024 (12) | -0.0014 (12) |



**Table S8.** Geometric parameters (Å, °) for **6**

|           |             |           |           |
|-----------|-------------|-----------|-----------|
| C11—C5    | 1.694 (2)   | O3—N1     | 1.219 (3) |
| O5—N4     | 1.224 (3)   | N4—C6     | 1.446 (3) |
| O4—N4     | 1.226 (3)   | N3—C6     | 1.326 (3) |
| O1—C2     | 1.209 (3)   | N1—C4     | 1.444 (3) |
| O2—N1     | 1.229 (3)   | C5—C4     | 1.374 (4) |
| N2—N3     | 1.335 (3)   | C5—C6     | 1.400 (3) |
| N2—C4     | 1.358 (3)   | C3—C2     | 1.515 (3) |
| N2—C3     | 1.462 (3)   | C2—C1     | 1.490 (4) |
|           |             |           |           |
| N3—N2—C4  | 110.8 (2)   | C6—C5—C11 | 129.0 (2) |
| N3—N2—C3  | 117.54 (19) | N2—C4—N1  | 122.3 (2) |
| C4—N2—C3  | 131.0 (2)   | N2—C4—C5  | 108.8 (2) |
| O5—N4—O4  | 124.8 (2)   | C5—C4—N1  | 128.7 (2) |
| O5—N4—C6  | 117.9 (2)   | N3—C6—N4  | 117.5 (2) |
| O4—N4—C6  | 117.3 (2)   | N3—C6—C5  | 113.1 (2) |
| C6—N3—N2  | 105.00 (19) | C5—C6—N4  | 129.4 (2) |
| O2—N1—C4  | 117.8 (2)   | N2—C3—C2  | 112.2 (2) |
| O3—N1—O2  | 125.3 (2)   | O1—C2—C3  | 121.0 (2) |
| O3—N1—C4  | 116.9 (2)   | O1—C2—C1  | 124.1 (3) |
| C4—C5—C11 | 128.7 (2)   | C1—C2—C3  | 114.8 (2) |
| C4—C5—C6  | 102.3 (2)   |           |           |

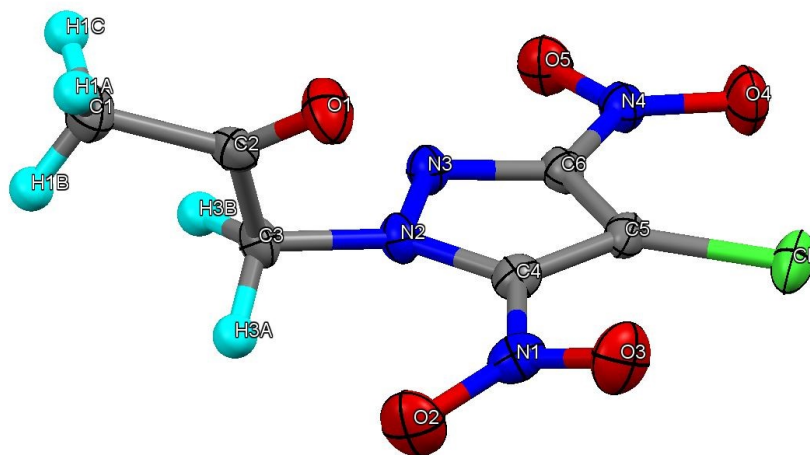**Fig. S3** Crystal structure of **6**.

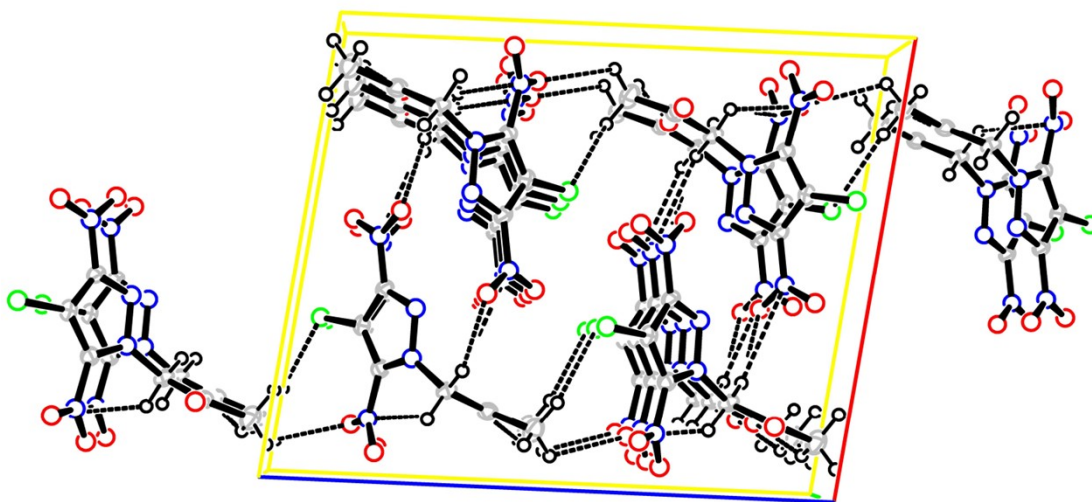

**Fig. S4** Packing diagram of **6**.

### 3. Single-crystal X-ray diffraction analysis of **7**

**Table S9.** Crystal data, data collection, and refinement for **7**

|                                                                                                                                                                                                                                                                                      |                                                                        |
|--------------------------------------------------------------------------------------------------------------------------------------------------------------------------------------------------------------------------------------------------------------------------------------|------------------------------------------------------------------------|
| $C_6H_7N_5O_5$                                                                                                                                                                                                                                                                       | $F(000) = 472$                                                         |
| $M_r = 229.17$                                                                                                                                                                                                                                                                       | $D_x = 1.701 \text{ Mg m}^{-3}$                                        |
| Monoclinic, $P2_1/c$                                                                                                                                                                                                                                                                 | Mo $K\alpha$ radiation, $\lambda = 0.71073 \text{ \AA}$                |
| $a = 4.4834 (4) \text{ \AA}$                                                                                                                                                                                                                                                         | Cell parameters from 1815 reflections                                  |
| $b = 20.756 (2) \text{ \AA}$                                                                                                                                                                                                                                                         | $\theta = 3.6\text{--}26.2^\circ$                                      |
| $c = 9.7107 (9) \text{ \AA}$                                                                                                                                                                                                                                                         | $\mu = 0.15 \text{ mm}^{-1}$                                           |
| $\beta = 97.924 (3)^\circ$                                                                                                                                                                                                                                                           | $T = 110 \text{ K}$                                                    |
| $V = 895.02 (15) \text{ \AA}^3$                                                                                                                                                                                                                                                      | Block, colourless                                                      |
| $Z = 4$                                                                                                                                                                                                                                                                              | $0.12 \times 0.08 \times 0.05 \text{ mm}$                              |
| Bruker D8 VENTURE diffractometer                                                                                                                                                                                                                                                     | 1219 reflections with $I > 2\sigma(I)$                                 |
| $\phi$ and $\omega$ scans                                                                                                                                                                                                                                                            | $R_{\text{int}} = 0.077$                                               |
| Absorption correction: multi-scan <i>SADABS2016/2</i> (Bruker,2016/2) was used for absorption correction. $wR2(\text{int})$ was 0.1043 before and 0.0671 after correction. The Ratio of minimum to maximum transmission is 0.8090. The $\lambda/2$ correction factor is Not present. | $\theta_{\text{max}} = 26.4^\circ$ , $\theta_{\text{min}} = 2.3^\circ$ |
| $T_{\text{min}} = 0.603$ , $T_{\text{max}} = 0.745$                                                                                                                                                                                                                                  | $h = -5 \rightarrow 5$                                                 |
| 8322 measured reflections                                                                                                                                                                                                                                                            | $k = -25 \rightarrow 24$                                               |
| 1823 independent reflections                                                                                                                                                                                                                                                         | $l = -12 \rightarrow 12$                                               |
| Refinement on $F^2$                                                                                                                                                                                                                                                                  | Primary atom site location: dual                                       |
| Least-squares matrix: full                                                                                                                                                                                                                                                           | Hydrogen site location: inferred from                                  |

|                                 |                                                                                     |
|---------------------------------|-------------------------------------------------------------------------------------|
|                                 | neighbouring sites                                                                  |
| $R[F^2 > 2\sigma(F^2)] = 0.050$ | H-atom parameters constrained                                                       |
| $wR(F^2) = 0.123$               | $w = 1/[\sigma^2(F_o^2) + (0.0417P)^2 + 0.6589P]$<br>where $P = (F_o^2 + 2F_c^2)/3$ |
| $S = 1.06$                      | $(\Delta/\sigma)_{\max} < 0.001$                                                    |
| 1823 reflections                | $\Delta)_{\max} = 0.30 \text{ e } \text{\AA}^{-3}$                                  |
| 146 parameters                  | $\Delta)_{\min} = -0.33 \text{ e } \text{\AA}^{-3}$                                 |
| 0 restraints                    |                                                                                     |

**Table S10.** Fractional atomic coordinates and isotropic or equivalent isotropic displacement parameters ( $\text{\AA}^2$ ) for **7**

|      | <i>x</i>   | <i>y</i>     | <i>z</i>     | $U_{\text{iso}}^*/U_{\text{eq}}$ |
|------|------------|--------------|--------------|----------------------------------|
| O001 | 0.6153 (4) | 0.63370 (8)  | 0.2153 (2)   | 0.0226 (5)                       |
| O002 | 0.8442 (4) | 0.78445 (8)  | 0.4709 (2)   | 0.0249 (5)                       |
| O003 | 1.1208 (4) | 0.72375 (9)  | 0.35405 (19) | 0.0239 (5)                       |
| O004 | 0.3055 (4) | 0.61541 (9)  | 0.7941 (2)   | 0.0270 (5)                       |
| O005 | 0.4788 (5) | 0.52107 (9)  | 0.7448 (2)   | 0.0301 (5)                       |
| N4   | 0.9045 (5) | 0.61459 (10) | 0.4733 (2)   | 0.0176 (5)                       |
| N5   | 0.7756 (5) | 0.57314 (10) | 0.5516 (2)   | 0.0189 (5)                       |
| N2   | 0.5085 (5) | 0.72606 (10) | 0.6614 (2)   | 0.0208 (5)                       |
| H2A  | 0.536272   | 0.765696     | 0.633666     | 0.025*                           |
| H2B  | 0.393734   | 0.718857     | 0.726404     | 0.025*                           |
| N3   | 0.9386 (5) | 0.73138 (10) | 0.4379 (2)   | 0.0207 (5)                       |
| N1   | 0.4602 (5) | 0.57972 (11) | 0.7295 (2)   | 0.0212 (5)                       |
| C2   | 0.6408 (6) | 0.67668 (12) | 0.6048 (3)   | 0.0175 (6)                       |
| C1   | 0.8292 (6) | 0.67718 (12) | 0.5017 (3)   | 0.0176 (6)                       |
| C4   | 0.8434 (6) | 0.60136 (12) | 0.2191 (3)   | 0.0191 (6)                       |
| C3   | 0.6232 (6) | 0.61006 (12) | 0.6306 (3)   | 0.0193 (6)                       |
| C5   | 1.0416 (6) | 0.58888 (13) | 0.3568 (3)   | 0.0201 (6)                       |
| H5A  | 1.073071   | 0.541922     | 0.369442     | 0.024*                           |
| H5B  | 1.240700   | 0.609273     | 0.355287     | 0.024*                           |
| C6   | 0.9476 (7) | 0.57239 (14) | 0.0939 (3)   | 0.0252 (7)                       |
| H6A  | 0.779216   | 0.570580     | 0.018090     | 0.038*                           |
| H6B  | 1.022613   | 0.528714     | 0.115822     | 0.038*                           |
| H6C  | 1.109638   | 0.598802     | 0.065387     | 0.038*                           |

**Table S11.** Atomic displacement parameters ( $\text{\AA}^2$ ) for **7**

|      | $U^{11}$    | $U^{22}$    | $U^{33}$    | $U^{12}$     | $U^{13}$    | $U^{23}$     |
|------|-------------|-------------|-------------|--------------|-------------|--------------|
| O001 | 0.0228 (11) | 0.0211 (10) | 0.0248 (11) | 0.0017 (8)   | 0.0061 (9)  | 0.0011 (8)   |
| O002 | 0.0338 (12) | 0.0160 (10) | 0.0269 (11) | 0.0012 (8)   | 0.0111 (10) | -0.0024 (8)  |
| O003 | 0.0257 (11) | 0.0278 (11) | 0.0212 (10) | -0.0023 (8)  | 0.0133 (10) | 0.0003 (8)   |
| O004 | 0.0299 (12) | 0.0305 (11) | 0.0240 (11) | 0.0026 (9)   | 0.0157 (10) | -0.0009 (9)  |
| O005 | 0.0371 (13) | 0.0231 (12) | 0.0327 (12) | -0.0009 (9)  | 0.0139 (10) | 0.0057 (9)   |
| N4   | 0.0200 (12) | 0.0167 (12) | 0.0176 (12) | -0.0001 (9)  | 0.0078 (10) | 0.0001 (9)   |
| N5   | 0.0206 (12) | 0.0199 (12) | 0.0175 (11) | -0.0005 (10) | 0.0076 (10) | 0.0011 (9)   |
| N2   | 0.0241 (12) | 0.0182 (12) | 0.0221 (12) | 0.0000 (10)  | 0.0107 (11) | -0.0020 (9)  |
| N3   | 0.0209 (12) | 0.0216 (13) | 0.0202 (12) | -0.0009 (10) | 0.0049 (11) | 0.0000 (10)  |
| N1   | 0.0218 (13) | 0.0249 (14) | 0.0176 (12) | -0.0014 (10) | 0.0048 (11) | 0.0025 (10)  |
| C2   | 0.0172 (14) | 0.0201 (14) | 0.0154 (13) | -0.0012 (11) | 0.0027 (12) | -0.0014 (10) |
| C1   | 0.0190 (14) | 0.0168 (14) | 0.0171 (13) | -0.0003 (11) | 0.0030 (12) | -0.0002 (11) |
| C4   | 0.0240 (15) | 0.0142 (14) | 0.0202 (14) | -0.0041 (11) | 0.0075 (13) | -0.0002 (11) |
| C3   | 0.0176 (14) | 0.0210 (15) | 0.0204 (14) | 0.0007 (11)  | 0.0063 (12) | 0.0019 (11)  |
| C5   | 0.0231 (15) | 0.0201 (14) | 0.0190 (14) | 0.0025 (11)  | 0.0095 (13) | -0.0003 (11) |
| C6   | 0.0303 (16) | 0.0267 (16) | 0.0202 (15) | 0.0019 (13)  | 0.0089 (14) | -0.0022 (12) |

**Table S12.** Geometric parameters ( $\text{\AA}$ ,  $^\circ$ ) for **7**

|            |           |            |           |
|------------|-----------|------------|-----------|
| O001—C4    | 1.220 (3) | N3—C1      | 1.405 (3) |
| O002—N3    | 1.238 (3) | N1—C3      | 1.430 (3) |
| O003—N3    | 1.240 (3) | C2—C1      | 1.396 (4) |
| O004—N1    | 1.242 (3) | C2—C3      | 1.409 (4) |
| O005—N1    | 1.228 (3) | C4—C5      | 1.522 (4) |
| N4—N5      | 1.332 (3) | C4—C6      | 1.488 (4) |
| N4—C1      | 1.380 (3) | C5—H5A     | 0.9900    |
| N4—C5      | 1.460 (3) | C5—H5B     | 0.9900    |
| N5—C3      | 1.337 (3) | C6—H6A     | 0.9800    |
| N2—H2A     | 0.8800    | C6—H6B     | 0.9800    |
| N2—H2B     | 0.8800    | C6—H6C     | 0.9800    |
| N2—C2      | 1.340 (3) |            |           |
|            |           |            |           |
| N5—N4—C1   | 110.9 (2) | O001—C4—C5 | 120.4 (2) |
| N5—N4—C5   | 117.9 (2) | O001—C4—C6 | 123.6 (3) |
| C1—N4—C5   | 129.8 (2) | C6—C4—C5   | 116.0 (2) |
| N4—N5—C3   | 104.7 (2) | N5—C3—N1   | 118.8 (2) |
| H2A—N2—H2B | 120.0     | N5—C3—C2   | 114.5 (2) |

|              |           |            |           |
|--------------|-----------|------------|-----------|
| C2—N2—H2A    | 120.0     | C2—C3—N1   | 126.7 (2) |
| C2—N2—H2B    | 120.0     | N4—C5—C4   | 111.2 (2) |
| O002—N3—O003 | 124.3 (2) | N4—C5—H5A  | 109.4     |
| O002—N3—C1   | 116.4 (2) | N4—C5—H5B  | 109.4     |
| O003—N3—C1   | 119.3 (2) | C4—C5—H5A  | 109.4     |
| O004—N1—C3   | 116.7 (2) | C4—C5—H5B  | 109.4     |
| O005—N1—O004 | 124.3 (2) | H5A—C5—H5B | 108.0     |
| O005—N1—C3   | 119.0 (2) | C4—C6—H6A  | 109.5     |
| N2—C2—C1     | 129.4 (2) | C4—C6—H6B  | 109.5     |
| N2—C2—C3     | 129.7 (2) | C4—C6—H6C  | 109.5     |
| C1—C2—C3     | 100.9 (2) | H6A—C6—H6B | 109.5     |
| N4—C1—N3     | 123.7 (2) | H6A—C6—H6C | 109.5     |
| N4—C1—C2     | 109.0 (2) | H6B—C6—H6C | 109.5     |
| C2—C1—N3     | 127.2 (2) |            |           |

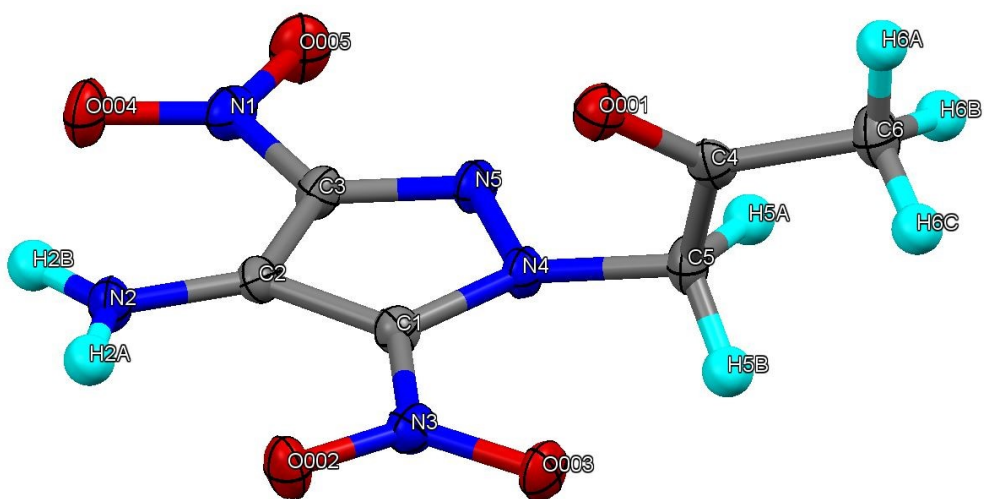

**Fig. S5** Crystal structure of **7**.

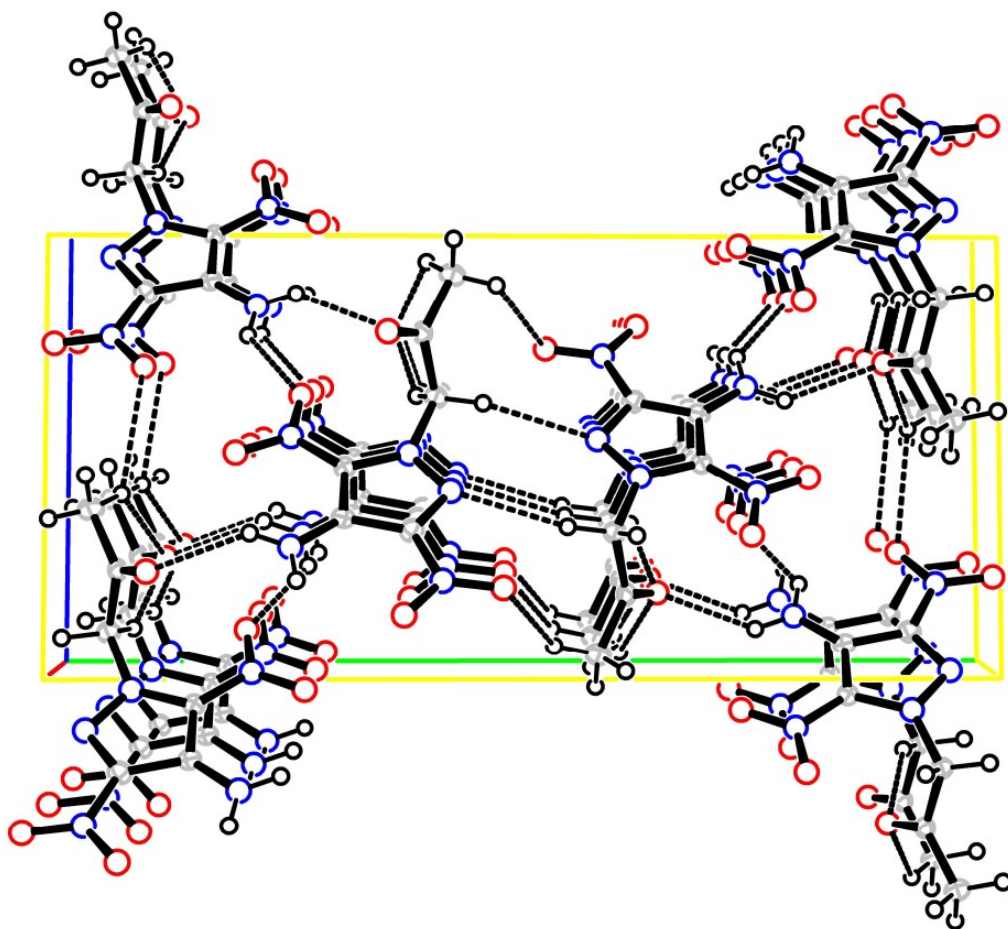

**Fig. S6** Packing diagram of **7**.

#### 4. Single-crystal X-ray diffraction analysis of **10**

**Table S13.** Crystal data, data collection, and refinement for **10**

|                                                                                    |                                                                        |
|------------------------------------------------------------------------------------|------------------------------------------------------------------------|
| $C_5H_3N_9O_{12}$                                                                  | $D_x = 1.894 \text{ Mg m}^{-3}$                                        |
| $M_r = 381.16$                                                                     | Mo $K\alpha$ radiation, $\lambda = 0.71073 \text{ \AA}$                |
| Orthorhombic, $Pbca$                                                               | Cell parameters from 1335 reflections                                  |
| $a = 6.2349 (6) \text{ \AA}$                                                       | $\theta = 2.3\text{--}24.5^\circ$                                      |
| $b = 19.5174 (18) \text{ \AA}$                                                     | $\mu = 0.19 \text{ mm}^{-1}$                                           |
| $c = 21.975 (2) \text{ \AA}$                                                       | $T = 150 \text{ K}$                                                    |
| $V = 2674.1 (4) \text{ \AA}^3$                                                     | Needle, colourless                                                     |
| $Z = 8$                                                                            | $0.12 \times 0.04 \times 0.02 \text{ mm}$                              |
| $F(000) = 1536$                                                                    |                                                                        |
| D8 VENTURE diffractometer                                                          | $R_{\text{int}} = 0.076$                                               |
| Absorption correction: multi-scan <i>SADABS2016/2</i> (Bruker,2016/2) was used for | $\theta_{\text{max}} = 26.4^\circ$ , $\theta_{\text{min}} = 2.1^\circ$ |

|                                                                                                                                                                                          |                                                                                     |
|------------------------------------------------------------------------------------------------------------------------------------------------------------------------------------------|-------------------------------------------------------------------------------------|
| absorption correction. wR2(int) was 0.0761 before and 0.0492 after correction. The Ratio of minimum to maximum transmission is 0.5420. The $\lambda/2$ correction factor is Not present. |                                                                                     |
| $T_{\min} = 0.025$ , $T_{\max} = 0.045$                                                                                                                                                  | $h = -7 \rightarrow 7$                                                              |
| 11892 measured reflections                                                                                                                                                               | $k = -24 \rightarrow 22$                                                            |
| 2702 independent reflections                                                                                                                                                             | $l = -27 \rightarrow 27$                                                            |
| 1507 reflections with $I > 2\sigma(I)$                                                                                                                                                   |                                                                                     |
| Refinement on $F^2$                                                                                                                                                                      | Primary atom site location: dual                                                    |
| Least-squares matrix: full                                                                                                                                                               | Hydrogen site location: inferred from neighbouring sites                            |
| $R[F^2 > 2\sigma(F^2)] = 0.061$                                                                                                                                                          | H-atom parameters constrained                                                       |
| $wR(F^2) = 0.162$                                                                                                                                                                        | $w = 1/[\sigma^2(F_o^2) + (0.0478P)^2 + 3.7423P]$<br>where $P = (F_o^2 + 2F_c^2)/3$ |
| $S = 1.05$                                                                                                                                                                               | $(\Delta/\sigma)_{\max} < 0.001$                                                    |
| 2702 reflections                                                                                                                                                                         | $\Delta_{\max} = 0.29 \text{ e } \text{\AA}^{-3}$                                   |
| 245 parameters                                                                                                                                                                           | $\Delta_{\min} = -0.35 \text{ e } \text{\AA}^{-3}$                                  |
| 243 restraints                                                                                                                                                                           |                                                                                     |

**Table S14.** Fractional atomic coordinates and isotropic or equivalent isotropic displacement parameters ( $\text{\AA}^2$ ) for **10**

|     | x          | y            | z            | $U_{\text{iso}}^*/U_{\text{eq}}$ | Occ. (<1) |
|-----|------------|--------------|--------------|----------------------------------|-----------|
| O5  | 0.6469 (5) | 0.72999 (14) | 0.73647 (11) | 0.0428 (7)                       |           |
| O2  | 0.0352 (5) | 0.74432 (15) | 0.63050 (13) | 0.0498 (8)                       |           |
| O3  | 0.2280 (5) | 0.76633 (16) | 0.51430 (13) | 0.0531 (8)                       |           |
| O1  | 0.0986 (5) | 0.84887 (14) | 0.66011 (14) | 0.0540 (8)                       |           |
| N1  | 0.3717 (5) | 0.78050 (14) | 0.64072 (13) | 0.0333 (7)                       |           |
| N2  | 0.1555 (6) | 0.79184 (17) | 0.64343 (14) | 0.0389 (8)                       |           |
| N6  | 0.6764 (6) | 0.67776 (16) | 0.70768 (15) | 0.0397 (8)                       |           |
| N5  | 0.5862 (6) | 0.61270 (15) | 0.61551 (14) | 0.0398 (8)                       |           |
| N8  | 0.6171 (7) | 0.51099 (17) | 0.68123 (16) | 0.0459 (9)                       |           |
| N4  | 0.4714 (6) | 0.61923 (16) | 0.56339 (14) | 0.0461 (9)                       |           |
| N3  | 0.2663 (7) | 0.7053 (2)   | 0.51542 (15) | 0.0507 (10)                      |           |
| O7  | 0.4690 (7) | 0.53522 (16) | 0.70664 (16) | 0.0754 (12)                      |           |
| O11 | 0.7078 (6) | 0.45802 (15) | 0.69257 (19) | 0.0810 (12)                      |           |
| O13 | 0.4862 (8) | 0.46906 (17) | 0.57489 (15) | 0.0815 (13)                      |           |
| C2  | 0.4378 (6) | 0.71585 (17) | 0.62133 (15) | 0.0302 (8)                       |           |
| C3  | 0.5674 (6) | 0.67066 (17) | 0.65105 (16) | 0.0324 (8)                       |           |
| O6  | 0.7944 (7) | 0.63154 (16) | 0.72303 (19) | 0.0921 (15)                      |           |

|     |             |              |              |             |     |
|-----|-------------|--------------|--------------|-------------|-----|
| N9  | 0.6504 (8)  | 0.50140 (19) | 0.57071 (19) | 0.0626 (12) |     |
| C1  | 0.3880 (7)  | 0.68020 (19) | 0.56717 (16) | 0.0378 (9)  |     |
| O4  | 0.2166 (8)  | 0.66493 (19) | 0.47614 (15) | 0.0973 (16) |     |
| O12 | 0.7817 (8)  | 0.5016 (2)   | 0.53072 (18) | 0.0955 (15) |     |
| C4  | 0.5137 (7)  | 0.83808 (18) | 0.65413 (18) | 0.0406 (10) |     |
| H4A | 0.473698    | 0.877398     | 0.628817     | 0.061*      |     |
| H4B | 0.662330    | 0.825010     | 0.645375     | 0.061*      |     |
| H4C | 0.500495    | 0.850469     | 0.697182     | 0.061*      |     |
| O10 | 1.0503 (6)  | 0.5153 (2)   | 0.6438 (2)   | 0.1064 (16) |     |
| C5  | 0.6970 (7)  | 0.55013 (19) | 0.6252 (2)   | 0.0464 (10) |     |
| N7  | 0.9393 (8)  | 0.5604 (2)   | 0.6259 (3)   | 0.0987 (19) |     |
| O8  | 1.0231 (14) | 0.6134 (4)   | 0.6340 (6)   | 0.113 (4)   | 0.5 |
| O9  | 0.9716 (11) | 0.6117 (4)   | 0.5798 (4)   | 0.0596 (18) | 0.5 |

**Table S15.** Atomic displacement parameters ( $\text{\AA}^2$ ) for **10**

|     | $U^{11}$    | $U^{22}$    | $U^{33}$    | $U^{12}$     | $U^{13}$     | $U^{23}$     |
|-----|-------------|-------------|-------------|--------------|--------------|--------------|
| O5  | 0.0457 (19) | 0.0482 (16) | 0.0344 (14) | 0.0030 (14)  | -0.0022 (13) | -0.0061 (12) |
| O2  | 0.0370 (18) | 0.0577 (18) | 0.0546 (17) | -0.0106 (15) | 0.0029 (14)  | -0.0061 (15) |
| O3  | 0.053 (2)   | 0.0565 (19) | 0.0494 (17) | 0.0050 (16)  | -0.0062 (15) | 0.0110 (14)  |
| O1  | 0.049 (2)   | 0.0430 (16) | 0.070 (2)   | 0.0142 (14)  | 0.0068 (17)  | -0.0012 (15) |
| N1  | 0.0289 (18) | 0.0298 (15) | 0.0410 (17) | 0.0000 (13)  | -0.0006 (14) | -0.0002 (14) |
| N2  | 0.035 (2)   | 0.0407 (18) | 0.0410 (18) | 0.0047 (16)  | 0.0024 (15)  | 0.0032 (16)  |
| N6  | 0.035 (2)   | 0.0357 (17) | 0.0487 (19) | -0.0028 (16) | -0.0079 (16) | 0.0034 (16)  |
| N5  | 0.045 (2)   | 0.0292 (16) | 0.0447 (18) | 0.0039 (15)  | 0.0069 (16)  | -0.0032 (14) |
| N8  | 0.050 (3)   | 0.0318 (18) | 0.056 (2)   | -0.0015 (17) | -0.0128 (19) | -0.0017 (16) |
| N4  | 0.065 (3)   | 0.0345 (18) | 0.0382 (18) | -0.0052 (17) | 0.0054 (18)  | -0.0042 (15) |
| N3  | 0.061 (3)   | 0.056 (2)   | 0.0350 (18) | -0.007 (2)   | -0.0052 (18) | 0.0021 (17)  |
| O7  | 0.106 (3)   | 0.0447 (18) | 0.076 (2)   | 0.015 (2)    | 0.039 (2)    | 0.0124 (17)  |
| O11 | 0.066 (3)   | 0.0352 (17) | 0.142 (3)   | 0.0023 (17)  | -0.032 (2)   | 0.0204 (19)  |
| O13 | 0.129 (4)   | 0.052 (2)   | 0.064 (2)   | -0.042 (2)   | 0.012 (2)    | -0.0149 (17) |
| C2  | 0.032 (2)   | 0.0265 (17) | 0.0318 (17) | -0.0034 (16) | 0.0029 (16)  | 0.0033 (15)  |
| C3  | 0.036 (2)   | 0.0286 (17) | 0.0331 (18) | -0.0026 (17) | 0.0023 (16)  | 0.0002 (15)  |
| O6  | 0.093 (3)   | 0.0389 (17) | 0.145 (3)   | 0.0192 (18)  | -0.085 (3)   | -0.014 (2)   |
| N9  | 0.083 (4)   | 0.038 (2)   | 0.067 (3)   | 0.002 (2)    | 0.024 (2)    | -0.0083 (19) |
| C1  | 0.049 (3)   | 0.036 (2)   | 0.0289 (18) | -0.0057 (19) | 0.0037 (17)  | 0.0029 (16)  |
| O4  | 0.173 (5)   | 0.067 (2)   | 0.0517 (19) | -0.013 (3)   | -0.046 (3)   | -0.0106 (17) |
| O12 | 0.118 (4)   | 0.082 (3)   | 0.086 (3)   | 0.032 (3)    | 0.057 (3)    | 0.003 (2)    |
| C4  | 0.043 (3)   | 0.0300 (19) | 0.049 (2)   | -0.0065 (18) | 0.006 (2)    | -0.0037 (18) |



|     |           |             |            |              |            |              |
|-----|-----------|-------------|------------|--------------|------------|--------------|
| O10 | 0.037 (3) | 0.094 (3)   | 0.188 (5)  | 0.013 (2)    | -0.009 (3) | -0.023 (3)   |
| C5  | 0.037 (3) | 0.0297 (19) | 0.073 (3)  | -0.0014 (17) | 0.008 (2)  | -0.0058 (18) |
| N7  | 0.044 (3) | 0.041 (2)   | 0.212 (6)  | -0.006 (2)   | 0.036 (3)  | -0.029 (3)   |
| O8  | 0.045 (5) | 0.043 (4)   | 0.251 (12) | -0.017 (3)   | 0.043 (7)  | -0.013 (6)   |
| O9  | 0.036 (4) | 0.047 (4)   | 0.095 (5)  | -0.011 (3)   | 0.009 (4)  | -0.033 (3)   |

**Table S16.** Geometric parameters (Å, °) for **10**

|           |           |            |            |
|-----------|-----------|------------|------------|
| O5—N6     | 1.214 (4) | N4—C1      | 1.301 (5)  |
| O2—N2     | 1.226 (4) | N3—C1      | 1.452 (5)  |
| O3—N3     | 1.215 (4) | N3—O4      | 1.209 (4)  |
| O1—N2     | 1.224 (4) | O13—N9     | 1.206 (6)  |
| N1—N2     | 1.367 (5) | C2—C3      | 1.363 (5)  |
| N1—C2     | 1.394 (4) | C2—C1      | 1.413 (5)  |
| N1—C4     | 1.461 (5) | N9—O12     | 1.201 (5)  |
| N6—C3     | 1.425 (5) | N9—C5      | 1.557 (6)  |
| N6—O6     | 1.212 (4) | C4—H4A     | 0.9800     |
| N5—N4     | 1.356 (5) | C4—H4B     | 0.9800     |
| N5—C3     | 1.380 (4) | C4—H4C     | 0.9800     |
| N5—C5     | 1.419 (5) | O10—N7     | 1.188 (6)  |
| N8—O7     | 1.178 (5) | C5—N7      | 1.524 (7)  |
| N8—O11    | 1.205 (4) | N7—O8      | 1.171 (8)  |
| N8—C5     | 1.532 (6) | N7—O9      | 1.440 (10) |
|           |           |            |            |
| N2—N1—C2  | 116.8 (3) | C2—C3—N5   | 108.0 (3)  |
| N2—N1—C4  | 117.7 (3) | O13—N9—C5  | 114.8 (4)  |
| C2—N1—C4  | 125.4 (3) | O12—N9—O13 | 129.5 (5)  |
| O2—N2—N1  | 118.1 (3) | O12—N9—C5  | 115.7 (5)  |
| O1—N2—O2  | 125.4 (4) | N4—C1—N3   | 117.8 (3)  |
| O1—N2—N1  | 116.5 (3) | N4—C1—C2   | 114.6 (4)  |
| O5—N6—C3  | 117.7 (3) | C2—C1—N3   | 127.5 (4)  |
| O6—N6—O5  | 124.9 (3) | N1—C4—H4A  | 109.5      |
| O6—N6—C3  | 117.4 (3) | N1—C4—H4B  | 109.5      |
| N4—N5—C3  | 110.9 (3) | N1—C4—H4C  | 109.5      |
| N4—N5—C5  | 117.7 (3) | H4A—C4—H4B | 109.5      |
| C3—N5—C5  | 131.4 (4) | H4A—C4—H4C | 109.5      |
| O7—N8—O11 | 127.9 (4) | H4B—C4—H4C | 109.5      |
| O7—N8—C5  | 115.8 (3) | N5—C5—N8   | 113.1 (3)  |
| O11—N8—C5 | 116.2 (4) | N5—C5—N9   | 108.6 (4)  |

|          |           |           |           |
|----------|-----------|-----------|-----------|
| C1—N4—N5 | 104.1 (3) | N5—C5—N7  | 111.8 (4) |
| O3—N3—C1 | 116.7 (3) | N8—C5—N9  | 104.7 (3) |
| O4—N3—O3 | 125.0 (4) | N7—C5—N8  | 112.3 (4) |
| O4—N3—C1 | 118.3 (4) | N7—C5—N9  | 105.8 (4) |
| N1—C2—C1 | 129.6 (3) | O10—N7—C5 | 118.9 (4) |
| C3—C2—N1 | 127.9 (3) | O10—N7—O9 | 131.9 (6) |
| C3—C2—C1 | 102.4 (3) | O8—N7—O10 | 110.1 (8) |
| N5—C3—N6 | 122.3 (3) | O8—N7—C5  | 124.0 (6) |
| C2—C3—N6 | 129.7 (3) | O9—N7—C5  | 102.9 (5) |

## 5. Single-crystal X-ray diffraction analysis of **11**

**Table S17.** Crystal data, data collection, and refinement for **11**

|                                                                                                                                                                                                                                                                           |                                                                          |
|---------------------------------------------------------------------------------------------------------------------------------------------------------------------------------------------------------------------------------------------------------------------------|--------------------------------------------------------------------------|
| C <sub>4</sub> N <sub>7</sub> O <sub>10</sub>                                                                                                                                                                                                                             | $F(000) = 1360$                                                          |
| $M_r = 341.56$                                                                                                                                                                                                                                                            | $D_x = 1.960 \text{ Mg m}^{-3}$                                          |
| Monoclinic, $P2_1/n$                                                                                                                                                                                                                                                      | Mo $K\alpha$ radiation, $\lambda = 0.71073 \text{ \AA}$                  |
| $a = 13.840 (2) \text{ \AA}$                                                                                                                                                                                                                                              | Cell parameters from 1257 reflections                                    |
| $b = 12.1903 (18) \text{ \AA}$                                                                                                                                                                                                                                            | $\theta = 2.3\text{--}20.7^\circ$                                        |
| $c = 14.668 (2) \text{ \AA}$                                                                                                                                                                                                                                              | $\mu = 0.41 \text{ mm}^{-1}$                                             |
| $\beta = 110.697 (4)^\circ$                                                                                                                                                                                                                                               | $T = 173 \text{ K}$                                                      |
| $V = 2315.0 (6) \text{ \AA}^3$                                                                                                                                                                                                                                            | Block, colourless                                                        |
| $Z = 8$                                                                                                                                                                                                                                                                   | $0.19 \times 0.12 \times 0.11 \text{ mm}$                                |
| Bruker APEX-II CCD diffractometer                                                                                                                                                                                                                                         | 2876 reflections with $I > 2\sigma(I)$                                   |
| $\phi$ and $\omega$ scans                                                                                                                                                                                                                                                 | $R_{\text{int}} = 0.086$                                                 |
| Absorption correction: multi-scan SADABS2014/5 (Bruker,2014/5) was used for absorption correction. $wR2(\text{int})$ was 0.0802 before and 0.0615 after correction. The Ratio of minimum to maximum transmission is 0.8994. The $\lambda/2$ correction factor is 0.00150. | $\theta_{\text{max}} = 27.6^\circ$ , $\theta_{\text{min}} = 1.7^\circ$   |
| $T_{\text{min}} = 0.671$ , $T_{\text{max}} = 0.746$                                                                                                                                                                                                                       | $h = -17 \rightarrow 17$                                                 |
| 18474 measured reflections                                                                                                                                                                                                                                                | $k = -15 \rightarrow 15$                                                 |
| 5239 independent reflections                                                                                                                                                                                                                                              | $l = -17 \rightarrow 19$                                                 |
| Refinement on $F^2$                                                                                                                                                                                                                                                       | Primary atom site location: dual                                         |
| Least-squares matrix: full                                                                                                                                                                                                                                                | $w = 1/[\sigma^2(F_o^2) + (0.043P)^2]$<br>where $P = (F_o^2 + 2F_c^2)/3$ |
| $R[F^2 > 2\sigma(F^2)] = 0.052$                                                                                                                                                                                                                                           | $(\Delta/\sigma)_{\text{max}} = 0.001$                                   |
| $wR(F^2) = 0.128$                                                                                                                                                                                                                                                         | $\Delta_{\text{max}} = 0.36 \text{ e \AA}^{-3}$                          |
| $S = 0.97$                                                                                                                                                                                                                                                                | $\Delta_{\text{min}} = -0.37 \text{ e \AA}^{-3}$                         |

|                  |                                                                                                                                             |
|------------------|---------------------------------------------------------------------------------------------------------------------------------------------|
| 5239 reflections | Extinction correction: <i>SHELXL2014/7</i><br>(Sheldrick 2014,<br>$F_c^* = kF_c[1 + 0.001 \times F_c^2 \lambda^3 / \sin(2\theta)]^{-1/4}$ ) |
| 407 parameters   | Extinction coefficient: 0.0104 (7)                                                                                                          |
| 404 restraints   |                                                                                                                                             |

**Table S18.** Fractional atomic coordinates and isotropic or equivalent isotropic displacement parameters ( $\text{\AA}^2$ ) for **11**

|     | <i>x</i>     | <i>y</i>      | <i>z</i>     | $U_{iso}^*/U_{eq}$ | Occ. (<1) |
|-----|--------------|---------------|--------------|--------------------|-----------|
| Cl2 | 0.08822 (7)  | 0.01271 (7)   | 0.21187 (7)  | 0.0477 (3)         |           |
| Cl1 | 0.86231 (7)  | 0.30632 (9)   | 0.41845 (7)  | 0.0593 (3)         |           |
| O2  | 0.51624 (17) | 0.29532 (17)  | 0.35240 (16) | 0.0387 (6)         |           |
| O8  | 0.49814 (18) | 0.01713 (18)  | 0.10809 (17) | 0.0430 (6)         |           |
| O10 | 0.50027 (19) | 0.26307 (19)  | 0.15544 (17) | 0.0475 (6)         |           |
| N3  | 0.61700 (18) | 0.13462 (18)  | 0.29261 (17) | 0.0252 (6)         |           |
| O14 | 0.39455 (19) | 0.41944 (19)  | 0.47961 (17) | 0.0456 (6)         |           |
| N14 | 0.22321 (18) | 0.29075 (19)  | 0.31618 (17) | 0.0273 (6)         |           |
| N13 | 0.23157 (18) | 0.23489 (19)  | 0.39884 (17) | 0.0261 (6)         |           |
| O7  | 0.49060 (19) | -0.08216 (18) | 0.22929 (18) | 0.0507 (7)         |           |
| N2  | 0.68612 (19) | 0.06253 (19)  | 0.28299 (17) | 0.0285 (6)         |           |
| N4  | 0.6071 (2)   | 0.3134 (2)    | 0.36601 (19) | 0.0338 (6)         |           |
| O1  | 0.6530 (2)   | 0.39731 (19)  | 0.39887 (18) | 0.0528 (7)         |           |
| N6  | 0.49844 (19) | 0.0028 (2)    | 0.1900 (2)   | 0.0333 (6)         |           |
| O12 | 0.11778 (19) | 0.1928 (2)    | 0.08177 (16) | 0.0540 (7)         |           |
| O5  | 0.5310 (2)   | 0.0615 (2)    | 0.41134 (19) | 0.0543 (7)         |           |
| O11 | 0.1770 (2)   | 0.3534 (2)    | 0.13483 (17) | 0.0580 (7)         |           |
| O13 | 0.2356 (2)   | 0.47398 (19)  | 0.4400 (2)   | 0.0612 (8)         |           |
| N5  | 0.4493 (2)   | 0.1966 (2)    | 0.17914 (19) | 0.0330 (6)         |           |
| O9  | 0.35652 (18) | 0.1874 (2)    | 0.1491 (2)   | 0.0605 (8)         |           |
| O21 | 0.1544 (2)   | -0.03521 (19) | 0.42676 (19) | 0.0573 (7)         |           |
| N8  | 0.3054 (2)   | 0.4081 (2)    | 0.46758 (19) | 0.0359 (7)         |           |
| N10 | 0.3720 (2)   | 0.2379 (2)    | 0.5579 (2)   | 0.0384 (7)         |           |
| O19 | 0.1044 (2)   | 0.2835 (2)    | 0.4884 (2)   | 0.0604 (8)         |           |
| N11 | 0.1547 (2)   | 0.2600 (2)    | 0.14612 (19) | 0.0365 (7)         |           |
| N7  | 0.4669 (2)   | 0.0812 (2)    | 0.3329 (2)   | 0.0386 (7)         |           |
| O20 | 0.2247 (2)   | 0.0886 (2)    | 0.53581 (18) | 0.0629 (8)         |           |
| O6  | 0.37449 (19) | 0.0787 (2)    | 0.3097 (2)   | 0.0649 (8)         |           |
| O15 | 0.4028 (2)   | 0.2712 (2)    | 0.64054 (18) | 0.0638 (8)         |           |
| N12 | 0.1888 (2)   | 0.0555 (2)    | 0.4517 (2)   | 0.0397 (7)         |           |

|     |             |             |            |             |      |
|-----|-------------|-------------|------------|-------------|------|
| O16 | 0.4133 (2)  | 0.1741 (2)  | 0.5221 (2) | 0.0668 (8)  |      |
| O4  | 0.8588 (2)  | -0.0386 (3) | 0.2946 (2) | 0.0719 (9)  |      |
| N9  | 0.1900 (2)  | 0.3095 (3)  | 0.5349 (2) | 0.0489 (8)  |      |
| C3  | 0.6646 (2)  | 0.2272 (2)  | 0.3416 (2) | 0.0270 (7)  |      |
| C7  | 0.1746 (2)  | 0.2224 (2)  | 0.2457 (2) | 0.0263 (7)  |      |
| C5  | 0.1877 (2)  | 0.1323 (2)  | 0.3768 (2) | 0.0283 (7)  |      |
| N1  | 0.8686 (2)  | 0.0532 (3)  | 0.3267 (2) | 0.0502 (8)  |      |
| C1  | 0.7759 (2)  | 0.1105 (3)  | 0.3252 (2) | 0.0320 (7)  |      |
| C6  | 0.1493 (2)  | 0.1206 (2)  | 0.2778 (2) | 0.0286 (7)  |      |
| C4  | 0.5104 (2)  | 0.1079 (2)  | 0.2517 (2) | 0.0254 (6)  |      |
| C8  | 0.2724 (2)  | 0.2915 (2)  | 0.4886 (2) | 0.0297 (7)  |      |
| C2  | 0.7684 (2)  | 0.2151 (3)  | 0.3623 (2) | 0.0329 (7)  |      |
| O3  | 0.9493 (2)  | 0.1026 (3)  | 0.3610 (3) | 0.0914 (11) |      |
| O17 | 0.2183 (5)  | 0.3727 (4)  | 0.6054 (4) | 0.0684 (16) | 0.67 |
| O18 | 0.2214 (10) | 0.3091 (9)  | 0.6267 (7) | 0.063 (3)   | 0.33 |

**Table S19.** Atomic displacement parameters ( $\text{\AA}^2$ ) for **11**

|     | $U^{11}$    | $U^{22}$    | $U^{33}$    | $U^{12}$     | $U^{13}$     | $U^{23}$     |
|-----|-------------|-------------|-------------|--------------|--------------|--------------|
| Cl2 | 0.0472 (6)  | 0.0446 (5)  | 0.0494 (6)  | -0.0146 (4)  | 0.0149 (5)   | -0.0229 (4)  |
| Cl1 | 0.0356 (5)  | 0.0803 (7)  | 0.0527 (7)  | -0.0233 (5)  | 0.0041 (5)   | -0.0105 (5)  |
| O2  | 0.0349 (14) | 0.0365 (13) | 0.0434 (15) | 0.0057 (10)  | 0.0121 (12)  | -0.0049 (10) |
| O8  | 0.0479 (15) | 0.0427 (13) | 0.0369 (14) | -0.0005 (11) | 0.0130 (13)  | -0.0111 (11) |
| O10 | 0.0496 (16) | 0.0395 (13) | 0.0418 (15) | -0.0055 (12) | 0.0016 (13)  | 0.0132 (11)  |
| N3  | 0.0219 (13) | 0.0248 (13) | 0.0287 (14) | 0.0036 (10)  | 0.0087 (12)  | -0.0007 (10) |
| O14 | 0.0409 (15) | 0.0514 (15) | 0.0439 (15) | -0.0070 (12) | 0.0141 (13)  | 0.0018 (11)  |
| N14 | 0.0250 (14) | 0.0299 (14) | 0.0238 (14) | 0.0018 (11)  | 0.0045 (12)  | 0.0005 (10)  |
| N13 | 0.0263 (14) | 0.0285 (13) | 0.0222 (14) | 0.0003 (11)  | 0.0069 (12)  | -0.0028 (10) |
| O7  | 0.0633 (17) | 0.0268 (12) | 0.0642 (17) | -0.0037 (11) | 0.0253 (15)  | -0.0009 (11) |
| N2  | 0.0272 (14) | 0.0333 (14) | 0.0278 (15) | 0.0115 (11)  | 0.0131 (13)  | 0.0059 (11)  |
| N4  | 0.0446 (18) | 0.0255 (14) | 0.0304 (16) | 0.0002 (13)  | 0.0120 (15)  | -0.0009 (11) |
| O1  | 0.0627 (17) | 0.0371 (14) | 0.0572 (17) | -0.0139 (12) | 0.0193 (14)  | -0.0190 (12) |
| N6  | 0.0270 (15) | 0.0266 (14) | 0.0443 (18) | -0.0012 (11) | 0.0100 (14)  | -0.0026 (12) |
| O12 | 0.0571 (17) | 0.0721 (18) | 0.0250 (14) | -0.0031 (14) | 0.0047 (13)  | -0.0155 (12) |
| O5  | 0.0580 (18) | 0.0660 (17) | 0.0436 (16) | 0.0038 (14)  | 0.0238 (15)  | 0.0132 (13)  |
| O11 | 0.074 (2)   | 0.0603 (17) | 0.0341 (15) | -0.0079 (15) | 0.0121 (14)  | 0.0099 (12)  |
| O13 | 0.0478 (16) | 0.0352 (14) | 0.0722 (19) | 0.0124 (12)  | -0.0141 (15) | -0.0110 (13) |
| N5  | 0.0284 (16) | 0.0315 (14) | 0.0323 (16) | 0.0052 (12)  | 0.0024 (13)  | -0.0038 (12) |
| O9  | 0.0242 (14) | 0.0756 (19) | 0.0688 (19) | 0.0116 (13)  | 0.0005 (14)  | 0.0070 (15)  |

|     |             |             |             |              |              |              |
|-----|-------------|-------------|-------------|--------------|--------------|--------------|
| O21 | 0.0685 (19) | 0.0337 (14) | 0.0707 (19) | -0.0103 (13) | 0.0258 (16)  | 0.0025 (12)  |
| N8  | 0.0386 (18) | 0.0328 (15) | 0.0255 (15) | 0.0009 (13)  | -0.0019 (14) | -0.0079 (12) |
| N10 | 0.0402 (18) | 0.0386 (16) | 0.0280 (16) | -0.0019 (13) | 0.0016 (14)  | 0.0027 (13)  |
| O19 | 0.0335 (15) | 0.090 (2)   | 0.0601 (19) | -0.0116 (14) | 0.0196 (15)  | -0.0223 (15) |
| N11 | 0.0260 (15) | 0.0539 (18) | 0.0264 (16) | 0.0037 (13)  | 0.0054 (13)  | -0.0028 (14) |
| N7  | 0.0394 (19) | 0.0333 (15) | 0.051 (2)   | -0.0014 (13) | 0.0253 (17)  | -0.0015 (13) |
| O20 | 0.090 (2)   | 0.0578 (17) | 0.0328 (15) | -0.0143 (15) | 0.0112 (15)  | 0.0081 (12)  |
| O6  | 0.0356 (15) | 0.083 (2)   | 0.090 (2)   | -0.0015 (14) | 0.0384 (16)  | 0.0096 (16)  |
| O15 | 0.068 (2)   | 0.0742 (19) | 0.0278 (15) | 0.0086 (15)  | -0.0090 (14) | 0.0014 (13)  |
| N12 | 0.0410 (18) | 0.0346 (15) | 0.0436 (18) | 0.0017 (14)  | 0.0151 (16)  | 0.0052 (13)  |
| O16 | 0.0528 (18) | 0.0664 (18) | 0.0656 (19) | 0.0288 (14)  | 0.0015 (15)  | -0.0148 (15) |
| O4  | 0.0539 (19) | 0.083 (2)   | 0.082 (2)   | 0.0318 (16)  | 0.0284 (17)  | -0.0053 (17) |
| N9  | 0.0374 (19) | 0.079 (2)   | 0.0340 (18) | 0.0010 (17)  | 0.0168 (16)  | -0.0177 (16) |
| C3  | 0.0252 (16) | 0.0318 (16) | 0.0207 (16) | -0.0014 (13) | 0.0040 (14)  | 0.0006 (12)  |
| C7  | 0.0207 (16) | 0.0350 (17) | 0.0203 (16) | 0.0028 (13)  | 0.0038 (14)  | -0.0058 (12) |
| C5  | 0.0235 (17) | 0.0312 (16) | 0.0305 (18) | -0.0012 (13) | 0.0097 (15)  | -0.0019 (13) |
| N1  | 0.0335 (19) | 0.075 (2)   | 0.044 (2)   | 0.0179 (17)  | 0.0160 (16)  | 0.0069 (17)  |
| C1  | 0.0220 (17) | 0.0488 (19) | 0.0255 (18) | 0.0061 (14)  | 0.0089 (15)  | 0.0092 (14)  |
| C6  | 0.0196 (16) | 0.0344 (16) | 0.0324 (18) | -0.0007 (13) | 0.0098 (15)  | -0.0105 (13) |
| C4  | 0.0237 (16) | 0.0230 (14) | 0.0305 (17) | 0.0010 (12)  | 0.0109 (14)  | -0.0006 (12) |
| C8  | 0.0270 (17) | 0.0369 (17) | 0.0218 (16) | 0.0009 (13)  | 0.0044 (14)  | -0.0054 (13) |
| C2  | 0.0249 (17) | 0.0464 (19) | 0.0242 (18) | -0.0055 (14) | 0.0047 (15)  | 0.0055 (14)  |
| O3  | 0.0234 (16) | 0.126 (3)   | 0.119 (3)   | 0.0045 (17)  | 0.0176 (19)  | -0.017 (2)   |
| O17 | 0.073 (3)   | 0.091 (4)   | 0.048 (3)   | -0.010 (3)   | 0.030 (3)    | -0.039 (3)   |
| O18 | 0.064 (6)   | 0.087 (7)   | 0.038 (4)   | -0.004 (6)   | 0.019 (4)    | -0.021 (5)   |

**Table S20.** Geometric parameters (Å, °) for **11**

|         |           |         |           |
|---------|-----------|---------|-----------|
| Cl2—C6  | 1.673 (3) | N5—C4   | 1.543 (4) |
| Cl1—C2  | 1.687 (3) | O21—N12 | 1.209 (3) |
| O2—N4   | 1.221 (3) | N8—C8   | 1.557 (4) |
| O8—N6   | 1.213 (3) | N10—O15 | 1.204 (3) |
| O10—N5  | 1.204 (3) | N10—O16 | 1.192 (3) |
| N3—N2   | 1.343 (3) | N10—C8  | 1.540 (4) |
| N3—C3   | 1.375 (4) | O19—N9  | 1.182 (3) |
| N3—C4   | 1.420 (4) | N11—C7  | 1.461 (4) |
| O14—N8  | 1.191 (3) | N7—O6   | 1.202 (3) |
| N14—N13 | 1.359 (3) | N7—C4   | 1.548 (4) |
| N14—C7  | 1.313 (3) | O20—N12 | 1.224 (3) |

|             |           |            |           |
|-------------|-----------|------------|-----------|
| N13—C5      | 1.378 (4) | N12—C5     | 1.439 (4) |
| N13—C8      | 1.415 (4) | O4—N1      | 1.203 (4) |
| O7—N6       | 1.208 (3) | N9—C8      | 1.535 (4) |
| N2—C1       | 1.313 (4) | N9—O17     | 1.238 (5) |
| N4—O1       | 1.211 (3) | N9—O18     | 1.260 (9) |
| N4—C3       | 1.437 (4) | C3—C2      | 1.368 (4) |
| N6—C4       | 1.543 (4) | C7—C6      | 1.415 (4) |
| O12—N11     | 1.218 (3) | C5—C6      | 1.366 (4) |
| O5—N7       | 1.203 (3) | N1—C1      | 1.454 (4) |
| O11—N11     | 1.206 (3) | N1—O3      | 1.211 (4) |
| O13—N8      | 1.210 (3) | C1—C2      | 1.405 (4) |
| N5—O9       | 1.206 (3) |            |           |
|             |           |            |           |
| N2—N3—C3    | 111.4 (2) | O17—N9—C8  | 113.1 (4) |
| N2—N3—C4    | 118.5 (2) | O18—N9—C8  | 116.2 (6) |
| C3—N3—C4    | 130.0 (2) | N3—C3—N4   | 121.7 (3) |
| C7—N14—N13  | 104.1 (2) | C2—C3—N3   | 107.4 (3) |
| N14—N13—C5  | 110.7 (2) | C2—C3—N4   | 130.9 (3) |
| N14—N13—C8  | 117.7 (2) | N14—C7—N11 | 116.8 (3) |
| C5—N13—C8   | 131.2 (2) | N14—C7—C6  | 114.4 (3) |
| C1—N2—N3    | 104.5 (2) | C6—C7—N11  | 128.8 (3) |
| O2—N4—C3    | 117.1 (2) | N13—C5—N12 | 121.7 (3) |
| O1—N4—O2    | 125.7 (3) | C6—C5—N13  | 108.5 (3) |
| O1—N4—C3    | 117.2 (3) | C6—C5—N12  | 129.7 (3) |
| O8—N6—C4    | 115.0 (2) | O4—N1—C1   | 117.7 (3) |
| O7—N6—O8    | 128.8 (3) | O4—N1—O3   | 125.8 (3) |
| O7—N6—C4    | 116.1 (3) | O3—N1—C1   | 116.5 (3) |
| O10—N5—O9   | 127.8 (3) | N2—C1—N1   | 118.4 (3) |
| O10—N5—C4   | 115.9 (2) | N2—C1—C2   | 113.6 (3) |
| O9—N5—C4    | 116.2 (3) | C2—C1—N1   | 128.0 (3) |
| O14—N8—O13  | 129.4 (3) | C7—C6—C12  | 129.2 (2) |
| O14—N8—C8   | 116.0 (3) | C5—C6—C12  | 128.6 (2) |
| O13—N8—C8   | 114.6 (3) | C5—C6—C7   | 102.3 (2) |
| O15—N10—C8  | 116.0 (3) | N3—C4—N6   | 108.6 (2) |
| O16—N10—O15 | 127.5 (3) | N3—C4—N5   | 111.4 (2) |
| O16—N10—C8  | 116.3 (3) | N3—C4—N7   | 110.6 (2) |
| O12—N11—C7  | 116.3 (3) | N6—C4—N5   | 105.0 (2) |
| O11—N11—O12 | 125.9 (3) | N6—C4—N7   | 106.7 (2) |
| O11—N11—C7  | 117.8 (3) | N5—C4—N7   | 114.2 (2) |

|             |           |            |           |
|-------------|-----------|------------|-----------|
| O5—N7—C4    | 115.0 (3) | N13—C8—N8  | 108.1 (2) |
| O6—N7—O5    | 128.1 (3) | N13—C8—N10 | 112.1 (2) |
| O6—N7—C4    | 116.8 (3) | N13—C8—N9  | 111.5 (3) |
| O21—N12—O20 | 125.6 (3) | N10—C8—N8  | 105.1 (2) |
| O21—N12—C5  | 117.9 (3) | N9—C8—N8   | 105.9 (2) |
| O20—N12—C5  | 116.6 (3) | N9—C8—N10  | 113.6 (2) |
| O19—N9—C8   | 117.1 (3) | C3—C2—C11  | 127.2 (3) |
| O19—N9—O17  | 127.3 (4) | C3—C2—C1   | 103.1 (3) |
| O19—N9—O18  | 120.9 (6) | C1—C2—C11  | 129.6 (2) |

## 6. Single-crystal X-ray diffraction analysis of **12**

**Table S21.** Crystal data, data collection, and refinement for **12**

|                                                                                                                                                                                                                                                                                      |                                                                                     |
|--------------------------------------------------------------------------------------------------------------------------------------------------------------------------------------------------------------------------------------------------------------------------------------|-------------------------------------------------------------------------------------|
| C <sub>4</sub> N <sub>8</sub> O <sub>9</sub>                                                                                                                                                                                                                                         | $F(000) = 608$                                                                      |
| $M_r = 304.12$                                                                                                                                                                                                                                                                       | $D_x = 1.927 \text{ Mg m}^{-3}$                                                     |
| Monoclinic, $P2_1/n$                                                                                                                                                                                                                                                                 | Mo $K\alpha$ radiation, $\lambda = 0.71073 \text{ \AA}$                             |
| $a = 8.4799 (7) \text{ \AA}$                                                                                                                                                                                                                                                         | Cell parameters from 2752 reflections                                               |
| $b = 11.5935 (9) \text{ \AA}$                                                                                                                                                                                                                                                        | $\theta = 2.6\text{--}26.2^\circ$                                                   |
| $c = 10.6812 (8) \text{ \AA}$                                                                                                                                                                                                                                                        | $\mu = 0.19 \text{ mm}^{-1}$                                                        |
| $\beta = 93.431 (3)^\circ$                                                                                                                                                                                                                                                           | $T = 170 \text{ K}$                                                                 |
| $V = 1048.20 (14) \text{ \AA}^3$                                                                                                                                                                                                                                                     | Block, colourless                                                                   |
| $Z = 4$                                                                                                                                                                                                                                                                              | $0.12 \times 0.05 \times 0.03 \text{ mm}$                                           |
| Bruker D8 VENTURE diffractometer                                                                                                                                                                                                                                                     | 1543 reflections with $I > 2\sigma(I)$                                              |
| $\phi$ and $\omega$ scans                                                                                                                                                                                                                                                            | $R_{\text{int}} = 0.050$                                                            |
| Absorption correction: multi-scan <i>SADABS2016/2</i> (Bruker,2016/2) was used for absorption correction. $wR2(\text{int})$ was 0.1080 before and 0.0517 after correction. The Ratio of minimum to maximum transmission is 0.9018. The $\lambda/2$ correction factor is Not present. | $\theta_{\text{max}} = 26.5^\circ$ , $\theta_{\text{min}} = 2.6^\circ$              |
| $T_{\text{min}} = 0.672$ , $T_{\text{max}} = 0.745$                                                                                                                                                                                                                                  | $h = -10 \rightarrow 10$                                                            |
| 10845 measured reflections                                                                                                                                                                                                                                                           | $k = -14 \rightarrow 14$                                                            |
| 2151 independent reflections                                                                                                                                                                                                                                                         | $l = -13 \rightarrow 13$                                                            |
| Refinement on $F^2$                                                                                                                                                                                                                                                                  | 0 restraints                                                                        |
| Least-squares matrix: full                                                                                                                                                                                                                                                           | Primary atom site location: dual                                                    |
| $R[F^2 > 2\sigma(F^2)] = 0.048$                                                                                                                                                                                                                                                      | $w = 1/[\sigma^2(F_o^2) + (0.0432P)^2 + 0.8993P]$<br>where $P = (F_o^2 + 2F_c^2)/3$ |
| $wR(F^2) = 0.123$                                                                                                                                                                                                                                                                    | $(\Delta/\sigma)_{\text{max}} = 0.002$                                              |
| $S = 1.10$                                                                                                                                                                                                                                                                           | $\Delta_{\text{max}} = 0.27 \text{ e \AA}^{-3}$                                     |

|                  |                                                        |
|------------------|--------------------------------------------------------|
| 2151 reflections | $\Delta\rho_{\min} = -0.27 \text{ e } \text{\AA}^{-3}$ |
| 190 parameters   |                                                        |

**Table S22.** Fractional atomic coordinates and isotropic or equivalent isotropic displacement parameters ( $\text{\AA}^2$ ) for **12**

|    | x           | y            | z            | $U_{\text{iso}}^*/U_{\text{eq}}$ |
|----|-------------|--------------|--------------|----------------------------------|
| O3 | 0.4398 (2)  | 0.44469 (15) | 0.87363 (17) | 0.0292 (4)                       |
| O2 | 0.8403 (2)  | 0.77159 (17) | 0.7634 (2)   | 0.0385 (5)                       |
| O4 | 0.3848 (2)  | 0.36316 (17) | 0.6030 (2)   | 0.0398 (5)                       |
| O6 | 0.1480 (3)  | 0.60227 (18) | 0.8350 (2)   | 0.0413 (5)                       |
| N5 | 0.4056 (2)  | 0.57484 (18) | 0.7073 (2)   | 0.0259 (5)                       |
| N2 | 0.7429 (3)  | 0.59210 (18) | 0.9125 (2)   | 0.0250 (5)                       |
| N4 | 0.4780 (3)  | 0.66981 (18) | 0.6561 (2)   | 0.0253 (5)                       |
| O9 | 0.2807 (3)  | 0.5341 (2)   | 0.4368 (2)   | 0.0457 (6)                       |
| O1 | 0.6730 (3)  | 0.84826 (19) | 0.6267 (2)   | 0.0516 (6)                       |
| O8 | 0.1667 (3)  | 0.6809 (2)   | 0.5210 (2)   | 0.0518 (6)                       |
| N1 | 0.7138 (3)  | 0.77478 (19) | 0.7029 (2)   | 0.0286 (5)                       |
| O7 | -0.0101 (2) | 0.5510 (2)   | 0.6771 (2)   | 0.0549 (7)                       |
| N6 | 0.2644 (3)  | 0.40139 (19) | 0.6404 (2)   | 0.0308 (5)                       |
| N8 | 0.2316 (3)  | 0.5882 (2)   | 0.5231 (2)   | 0.0336 (6)                       |
| N7 | 0.1192 (3)  | 0.5662 (2)   | 0.7300 (2)   | 0.0342 (6)                       |
| N3 | 0.8416 (3)  | 0.5847 (2)   | 0.9848 (2)   | 0.0326 (6)                       |
| O5 | 0.1479 (3)  | 0.34990 (19) | 0.6678 (3)   | 0.0566 (7)                       |
| C1 | 0.6048 (3)  | 0.6822 (2)   | 0.7271 (2)   | 0.0234 (6)                       |
| C2 | 0.6230 (3)  | 0.6002 (2)   | 0.8252 (2)   | 0.0234 (6)                       |
| C3 | 0.4866 (3)  | 0.5256 (2)   | 0.8162 (2)   | 0.0243 (6)                       |
| C4 | 0.2620 (3)  | 0.5356 (2)   | 0.6547 (2)   | 0.0251 (6)                       |

**Table S23.** Atomic displacement parameters ( $\text{\AA}^2$ ) for **12**

|    | $U^{11}$    | $U^{22}$    | $U^{33}$    | $U^{12}$     | $U^{13}$     | $U^{23}$     |
|----|-------------|-------------|-------------|--------------|--------------|--------------|
| O3 | 0.0298 (10) | 0.0276 (10) | 0.0305 (10) | -0.0050 (8)  | 0.0047 (8)   | 0.0043 (8)   |
| O2 | 0.0277 (11) | 0.0415 (12) | 0.0461 (13) | -0.0095 (9)  | -0.0010 (10) | 0.0041 (10)  |
| O4 | 0.0372 (12) | 0.0345 (11) | 0.0482 (13) | 0.0052 (10)  | 0.0085 (10)  | -0.0058 (9)  |
| O6 | 0.0455 (13) | 0.0409 (12) | 0.0387 (13) | 0.0058 (10)  | 0.0119 (10)  | -0.0054 (10) |
| N5 | 0.0242 (12) | 0.0263 (11) | 0.0270 (12) | -0.0069 (9)  | 0.0000 (9)   | 0.0029 (9)   |
| N2 | 0.0247 (12) | 0.0228 (11) | 0.0279 (12) | -0.0025 (10) | 0.0051 (10)  | -0.0015 (10) |
| N4 | 0.0257 (12) | 0.0225 (11) | 0.0281 (12) | -0.0051 (9)  | 0.0044 (10)  | 0.0022 (9)   |



|    |             |             |             |              |              |              |
|----|-------------|-------------|-------------|--------------|--------------|--------------|
| O9 | 0.0550 (14) | 0.0512 (14) | 0.0305 (12) | -0.0098 (11) | -0.0007 (10) | -0.0014 (10) |
| O1 | 0.0484 (14) | 0.0417 (12) | 0.0626 (15) | -0.0177 (11) | -0.0127 (12) | 0.0267 (12)  |
| O8 | 0.0486 (14) | 0.0418 (13) | 0.0635 (16) | 0.0060 (11)  | -0.0089 (12) | 0.0149 (11)  |
| N1 | 0.0259 (13) | 0.0260 (12) | 0.0341 (13) | -0.0057 (10) | 0.0037 (10)  | 0.0000 (10)  |
| O7 | 0.0233 (11) | 0.0613 (16) | 0.0802 (18) | -0.0042 (11) | 0.0031 (12)  | -0.0163 (13) |
| N6 | 0.0310 (13) | 0.0278 (12) | 0.0337 (13) | -0.0048 (11) | 0.0040 (10)  | -0.0014 (10) |
| N8 | 0.0290 (13) | 0.0334 (13) | 0.0373 (14) | -0.0074 (11) | -0.0068 (11) | 0.0072 (11)  |
| N7 | 0.0272 (13) | 0.0287 (13) | 0.0475 (16) | -0.0018 (10) | 0.0089 (12)  | -0.0040 (11) |
| N3 | 0.0269 (13) | 0.0350 (13) | 0.0355 (14) | -0.0041 (11) | -0.0017 (11) | 0.0044 (11)  |
| O5 | 0.0447 (13) | 0.0365 (12) | 0.0906 (19) | -0.0172 (11) | 0.0209 (13)  | -0.0051 (12) |
| C1 | 0.0244 (13) | 0.0217 (13) | 0.0244 (13) | -0.0035 (11) | 0.0048 (11)  | -0.0022 (10) |
| C2 | 0.0212 (13) | 0.0244 (13) | 0.0246 (13) | -0.0006 (11) | 0.0011 (11)  | -0.0010 (11) |
| C3 | 0.0255 (14) | 0.0234 (13) | 0.0242 (14) | -0.0009 (11) | 0.0029 (11)  | -0.0010 (11) |
| C4 | 0.0221 (13) | 0.0246 (13) | 0.0285 (14) | -0.0008 (11) | 0.0012 (11)  | 0.0009 (11)  |

**Table S24.** Geometric parameters (Å, °) for **12**

|          |           |          |           |
|----------|-----------|----------|-----------|
| O3—C3    | 1.201 (3) | O1—N1    | 1.214 (3) |
| O2—N1    | 1.219 (3) | O8—N8    | 1.206 (3) |
| O4—N6    | 1.203 (3) | N1—C1    | 1.450 (3) |
| O6—N7    | 1.208 (3) | O7—N7    | 1.216 (3) |
| N5—N4    | 1.389 (3) | N6—O5    | 1.205 (3) |
| N5—C3    | 1.433 (3) | N6—C4    | 1.563 (3) |
| N5—C4    | 1.387 (3) | N8—C4    | 1.540 (4) |
| N2—N3    | 1.108 (3) | N7—C4    | 1.535 (3) |
| N2—C2    | 1.341 (3) | C1—C2    | 1.417 (4) |
| N4—C1    | 1.287 (3) | C2—C3    | 1.443 (4) |
| O9—N8    | 1.209 (3) |          |           |
|          |           |          |           |
| N4—N5—C3 | 115.7 (2) | O7—N7—C4 | 116.2 (2) |
| C4—N5—N4 | 119.9 (2) | N4—C1—N1 | 119.8 (2) |
| C4—N5—C3 | 124.4 (2) | N4—C1—C2 | 114.3 (2) |
| N3—N2—C2 | 179.5 (3) | C2—C1—N1 | 125.9 (2) |
| C1—N4—N5 | 103.3 (2) | N2—C2—C1 | 127.3 (2) |
| O2—N1—C1 | 115.6 (2) | N2—C2—C3 | 125.2 (2) |
| O1—N1—O2 | 125.7 (2) | C1—C2—C3 | 107.5 (2) |
| O1—N1—C1 | 118.6 (2) | O3—C3—N5 | 124.7 (2) |
| O4—N6—O5 | 128.5 (3) | O3—C3—C2 | 136.2 (3) |
| O4—N6—C4 | 114.5 (2) | N5—C3—C2 | 99.2 (2)  |

|          |           |          |           |
|----------|-----------|----------|-----------|
| O5—N6—C4 | 117.0 (2) | N5—C4—N6 | 110.5 (2) |
| O9—N8—C4 | 116.4 (2) | N5—C4—N8 | 109.6 (2) |
| O8—N8—O9 | 128.7 (3) | N5—C4—N7 | 114.4 (2) |
| O8—N8—C4 | 114.9 (2) | N8—C4—N6 | 107.9 (2) |
| O6—N7—O7 | 127.4 (3) | N7—C4—N6 | 107.2 (2) |
| O6—N7—C4 | 116.4 (2) | N7—C4—N8 | 107.0 (2) |

## 7. Single-crystal X-ray diffraction analysis of **13**

**Table S25.** Crystal data, data collection, and refinement for **13**

|                                                                                                                                                                                                                                                                                      |                                                                                     |
|--------------------------------------------------------------------------------------------------------------------------------------------------------------------------------------------------------------------------------------------------------------------------------------|-------------------------------------------------------------------------------------|
| C <sub>4</sub> H <sub>2</sub> N <sub>8</sub> O <sub>10</sub>                                                                                                                                                                                                                         | $F(000) = 1296$                                                                     |
| $M_r = 322.14$                                                                                                                                                                                                                                                                       | $D_x = 1.895 \text{ Mg m}^{-3}$                                                     |
| Monoclinic, $P2_1/n$                                                                                                                                                                                                                                                                 | Mo $K\alpha$ radiation, $\lambda = 0.71073 \text{ \AA}$                             |
| $a = 15.6313 (15) \text{ \AA}$                                                                                                                                                                                                                                                       | Cell parameters from 4207 reflections                                               |
| $b = 9.2702 (8) \text{ \AA}$                                                                                                                                                                                                                                                         | $\theta = 2.6\text{--}23.7^\circ$                                                   |
| $c = 15.7637 (14) \text{ \AA}$                                                                                                                                                                                                                                                       | $\mu = 0.19 \text{ mm}^{-1}$                                                        |
| $\beta = 98.696 (3)^\circ$                                                                                                                                                                                                                                                           | $T = 193 \text{ K}$                                                                 |
| $V = 2258.0 (4) \text{ \AA}^3$                                                                                                                                                                                                                                                       | Block                                                                               |
| $Z = 8$                                                                                                                                                                                                                                                                              | $0.12 \times 0.11 \times 0.1 \text{ mm}$                                            |
| Bruker D8 VENTURE dual wavelength Mo/Cu diffractometer                                                                                                                                                                                                                               | 5126 independent reflections                                                        |
| Radiation source: microfocus sealed X-ray tube, Incoatec I $\mu$ s DIAMOND                                                                                                                                                                                                           | 3391 reflections with $I > 2\sigma(I)$                                              |
| Helios Multi-layer Optic monochromator                                                                                                                                                                                                                                               | $R_{\text{int}} = 0.105$                                                            |
| Detector resolution: $7.41 \text{ pixels mm}^{-1}$                                                                                                                                                                                                                                   | $\theta_{\text{max}} = 27.5^\circ$ , $\theta_{\text{min}} = 2.0^\circ$              |
| $\omega$ and $\phi$ scans                                                                                                                                                                                                                                                            | $h = -19 \rightarrow 20$                                                            |
| Absorption correction: multi-scan <i>SADABS2016/2</i> (Bruker,2016/2) was used for absorption correction. $wR2(\text{int})$ was 0.1199 before and 0.0845 after correction. The Ratio of minimum to maximum transmission is 0.8851. The $\lambda/2$ correction factor is Not present. | $k = -12 \rightarrow 10$                                                            |
| $T_{\text{min}} = 0.660$ , $T_{\text{max}} = 0.746$                                                                                                                                                                                                                                  | $l = -20 \rightarrow 20$                                                            |
| 25214 measured reflections                                                                                                                                                                                                                                                           |                                                                                     |
| Refinement on $F^2$                                                                                                                                                                                                                                                                  | Primary atom site location: dual                                                    |
| Least-squares matrix: full                                                                                                                                                                                                                                                           | Hydrogen site location: inferred from neighbouring sites                            |
| $R[F^2 > 2\sigma(F^2)] = 0.066$                                                                                                                                                                                                                                                      | H-atom parameters constrained                                                       |
| $wR(F^2) = 0.195$                                                                                                                                                                                                                                                                    | $w = 1/[\sigma^2(F_o^2) + (0.0825P)^2 + 3.0392P]$<br>where $P = (F_o^2 + 2F_c^2)/3$ |
| $S = 1.03$                                                                                                                                                                                                                                                                           | $(\Delta/\sigma)_{\text{max}} < 0.001$                                              |

|                  |                                                        |
|------------------|--------------------------------------------------------|
| 5126 reflections | $\Delta\rho_{\max} = 0.50 \text{ e } \text{\AA}^{-3}$  |
| 398 parameters   | $\Delta\rho_{\min} = -0.29 \text{ e } \text{\AA}^{-3}$ |
| 0 restraints     |                                                        |

**Table S26.** Fractional atomic coordinates and isotropic or equivalent isotropic displacement parameters ( $\text{\AA}^2$ ) for **13**

|     | x            | y           | z            | $U_{\text{iso}}^*/U_{\text{eq}}$ |
|-----|--------------|-------------|--------------|----------------------------------|
| O20 | 0.73532 (17) | 0.1582 (3)  | 0.24100 (19) | 0.0344 (7)                       |
| O10 | 0.7421 (2)   | 0.6145 (3)  | 0.73330 (18) | 0.0384 (7)                       |
| O9  | 0.7507 (2)   | 0.3906 (3)  | 0.69231 (19) | 0.0397 (7)                       |
| N7  | 0.7620 (2)   | 0.5225 (3)  | 0.6836 (2)   | 0.0281 (7)                       |
| O2  | 0.9017 (2)   | 0.7579 (4)  | 0.39036 (19) | 0.0463 (8)                       |
| O1  | 0.8759 (2)   | 0.9203 (3)  | 0.4844 (2)   | 0.0469 (8)                       |
| N3  | 0.8257 (2)   | 0.4757 (3)  | 0.55333 (19) | 0.0265 (7)                       |
| O18 | 0.6395 (2)   | -0.3233 (3) | 0.3955 (2)   | 0.0453 (8)                       |
| N10 | 0.6867 (2)   | 0.0674 (3)  | 0.2641 (2)   | 0.0280 (7)                       |
| O6  | 0.67627 (19) | 0.3490 (4)  | 0.5106 (2)   | 0.0437 (8)                       |
| O12 | 0.39446 (19) | 0.3053 (4)  | 0.4085 (2)   | 0.0449 (8)                       |
| N15 | 0.49449 (19) | 0.0961 (4)  | 0.3622 (2)   | 0.0268 (7)                       |
| N11 | 0.6344 (2)   | -0.1937 (4) | 0.3907 (2)   | 0.0291 (7)                       |
| O13 | 0.41067 (19) | -0.2022 (4) | 0.3230 (2)   | 0.0488 (8)                       |
| O19 | 0.6954 (2)   | -0.0642 (3) | 0.2555 (2)   | 0.0440 (8)                       |
| O16 | 0.5145 (2)   | -0.1128 (4) | 0.1844 (2)   | 0.0504 (9)                       |
| O14 | 0.4866 (2)   | -0.1826 (4) | 0.4495 (2)   | 0.0469 (8)                       |
| N14 | 0.55675 (18) | 0.0221 (3)  | 0.33035 (19) | 0.0259 (7)                       |
| O7  | 0.8876 (2)   | 0.1292 (4)  | 0.6336 (2)   | 0.0512 (9)                       |
| O8  | 0.9252 (2)   | 0.3430 (4)  | 0.6764 (2)   | 0.0501 (8)                       |
| O4  | 0.8147 (2)   | 0.2453 (4)  | 0.40867 (19) | 0.0489 (9)                       |
| N2  | 0.8564 (2)   | 0.5500 (4)  | 0.4906 (2)   | 0.0283 (7)                       |
| N6  | 0.8847 (2)   | 0.2574 (4)  | 0.6292 (2)   | 0.0316 (7)                       |
| N13 | 0.4754 (2)   | -0.1780 (4) | 0.3725 (2)   | 0.0315 (7)                       |
| O15 | 0.5546 (2)   | -0.3231 (3) | 0.2345 (2)   | 0.0466 (8)                       |
| N9  | 0.6301 (2)   | 0.3790 (3)  | 0.3015 (2)   | 0.0308 (7)                       |
| H9A | 0.677746     | 0.378384    | 0.278075     | 0.037*                           |
| H9B | 0.607318     | 0.461483    | 0.314371     | 0.037*                           |
| O3  | 0.94303 (19) | 0.2656 (4)  | 0.4821 (2)   | 0.0477 (8)                       |
| O11 | 0.4829 (2)   | 0.4670 (4)  | 0.3723 (3)   | 0.0577 (10)                      |
| O5  | 0.7236 (2)   | 0.1361 (4)  | 0.5527 (2)   | 0.0512 (9)                       |

|     |            |             |            |            |
|-----|------------|-------------|------------|------------|
| O17 | 0.6826 (2) | -0.1086 (4) | 0.4304 (2) | 0.0552 (9) |
| N16 | 0.4598 (2) | 0.3419 (4)  | 0.3812 (2) | 0.0338 (8) |
| N5  | 0.7324 (2) | 0.2622 (4)  | 0.5386 (2) | 0.0325 (7) |
| N8  | 0.8022 (2) | 0.8329 (4)  | 0.6291 (2) | 0.0369 (8) |
| H8A | 0.780179   | 0.831589    | 0.677318   | 0.044*     |
| H8B | 0.815343   | 0.915631    | 0.606970   | 0.044*     |
| N4  | 0.8652 (2) | 0.2729 (4)  | 0.4715 (2) | 0.0320 (8) |
| N12 | 0.5416 (2) | -0.1959 (4) | 0.2409 (2) | 0.0317 (7) |
| N1  | 0.8783 (2) | 0.7961 (4)  | 0.4576 (2) | 0.0368 (8) |
| C6  | 0.5928 (2) | 0.2562 (4)  | 0.3174 (2) | 0.0233 (7) |
| C3  | 0.7993 (2) | 0.5697 (4)  | 0.6139 (2) | 0.0276 (8) |
| C5  | 0.6171 (2) | 0.1161 (4)  | 0.3027 (2) | 0.0246 (7) |
| C1  | 0.8501 (2) | 0.6860 (4)  | 0.5121 (2) | 0.0286 (8) |
| C4  | 0.8256 (2) | 0.3246 (4)  | 0.5507 (2) | 0.0277 (8) |
| C2  | 0.8154 (2) | 0.7104 (4)  | 0.5900 (2) | 0.0273 (8) |
| C7  | 0.5154 (2) | 0.2322 (4)  | 0.3550 (2) | 0.0260 (8) |
| C8  | 0.5547 (2) | -0.1294 (4) | 0.3322 (2) | 0.0262 (8) |

**Table S27.** Atomic displacement parameters ( $\text{\AA}^2$ ) for **13**

|     | $U^{11}$    | $U^{22}$    | $U^{33}$    | $U^{12}$     | $U^{13}$    | $U^{23}$     |
|-----|-------------|-------------|-------------|--------------|-------------|--------------|
| O20 | 0.0347 (15) | 0.0281 (16) | 0.0443 (16) | -0.0045 (11) | 0.0183 (12) | -0.0031 (12) |
| O10 | 0.0589 (18) | 0.0274 (16) | 0.0339 (15) | -0.0009 (13) | 0.0229 (13) | -0.0058 (12) |
| O9  | 0.0638 (19) | 0.0227 (15) | 0.0379 (16) | -0.0097 (13) | 0.0248 (14) | 0.0004 (12)  |
| N7  | 0.0389 (17) | 0.0202 (17) | 0.0276 (16) | -0.0030 (13) | 0.0130 (13) | -0.0008 (13) |
| O2  | 0.0572 (19) | 0.057 (2)   | 0.0286 (15) | -0.0101 (16) | 0.0179 (13) | 0.0074 (15)  |
| O1  | 0.061 (2)   | 0.0255 (17) | 0.058 (2)   | -0.0062 (14) | 0.0224 (16) | 0.0063 (15)  |
| N3  | 0.0363 (16) | 0.0194 (16) | 0.0262 (16) | -0.0027 (12) | 0.0129 (12) | 0.0021 (12)  |
| O18 | 0.059 (2)   | 0.0246 (17) | 0.0510 (19) | 0.0078 (14)  | 0.0037 (15) | 0.0031 (14)  |
| N10 | 0.0287 (15) | 0.0236 (17) | 0.0346 (17) | 0.0001 (12)  | 0.0143 (13) | -0.0022 (13) |
| O6  | 0.0375 (16) | 0.0428 (19) | 0.0507 (19) | 0.0013 (13)  | 0.0060 (13) | 0.0025 (15)  |
| O12 | 0.0386 (16) | 0.047 (2)   | 0.055 (2)   | 0.0141 (14)  | 0.0259 (14) | 0.0064 (16)  |
| N15 | 0.0283 (15) | 0.0274 (17) | 0.0266 (16) | 0.0034 (12)  | 0.0107 (12) | 0.0004 (13)  |
| N11 | 0.0283 (16) | 0.0290 (19) | 0.0301 (17) | -0.0013 (13) | 0.0045 (12) | 0.0006 (14)  |
| O13 | 0.0345 (16) | 0.063 (2)   | 0.0496 (19) | -0.0142 (15) | 0.0087 (14) | -0.0106 (17) |
| O19 | 0.0479 (17) | 0.0236 (16) | 0.069 (2)   | 0.0025 (13)  | 0.0345 (16) | -0.0065 (14) |
| O16 | 0.079 (2)   | 0.038 (2)   | 0.0320 (17) | 0.0165 (17)  | 0.0024 (15) | 0.0002 (14)  |
| O14 | 0.0485 (18) | 0.061 (2)   | 0.0352 (17) | 0.0036 (15)  | 0.0187 (14) | 0.0123 (15)  |
| N14 | 0.0274 (15) | 0.0216 (16) | 0.0314 (17) | 0.0017 (12)  | 0.0134 (12) | 0.0009 (13)  |

|     |             |             |             |              |              |              |
|-----|-------------|-------------|-------------|--------------|--------------|--------------|
| O7  | 0.067 (2)   | 0.0233 (17) | 0.061 (2)   | 0.0034 (14)  | 0.0031 (17)  | 0.0105 (15)  |
| O8  | 0.059 (2)   | 0.039 (2)   | 0.0456 (19) | 0.0008 (15)  | -0.0120 (15) | -0.0079 (15) |
| O4  | 0.0514 (18) | 0.068 (2)   | 0.0259 (15) | 0.0060 (16)  | 0.0030 (13)  | -0.0127 (15) |
| N2  | 0.0331 (16) | 0.0284 (18) | 0.0247 (15) | -0.0002 (13) | 0.0091 (12)  | 0.0038 (14)  |
| N6  | 0.0373 (18) | 0.032 (2)   | 0.0256 (16) | -0.0017 (14) | 0.0068 (13)  | 0.0006 (14)  |
| N13 | 0.0333 (17) | 0.0296 (19) | 0.0337 (18) | -0.0033 (14) | 0.0123 (14)  | -0.0002 (14) |
| O15 | 0.078 (2)   | 0.0216 (16) | 0.0410 (18) | 0.0007 (14)  | 0.0128 (15)  | -0.0045 (13) |
| N9  | 0.0373 (17) | 0.0176 (16) | 0.0405 (19) | 0.0000 (13)  | 0.0157 (14)  | 0.0002 (14)  |
| O3  | 0.0348 (16) | 0.070 (2)   | 0.0419 (18) | 0.0066 (15)  | 0.0172 (13)  | -0.0002 (16) |
| O11 | 0.067 (2)   | 0.0241 (17) | 0.092 (3)   | 0.0081 (15)  | 0.044 (2)    | -0.0009 (17) |
| O5  | 0.0498 (19) | 0.0271 (18) | 0.079 (3)   | -0.0060 (14) | 0.0174 (17)  | -0.0045 (16) |
| O17 | 0.054 (2)   | 0.039 (2)   | 0.064 (2)   | -0.0074 (15) | -0.0170 (17) | -0.0011 (17) |
| N16 | 0.0382 (18) | 0.0296 (19) | 0.0369 (18) | 0.0074 (14)  | 0.0166 (14)  | 0.0004 (15)  |
| N5  | 0.0334 (17) | 0.033 (2)   | 0.0330 (17) | -0.0020 (15) | 0.0125 (13)  | -0.0033 (15) |
| N8  | 0.054 (2)   | 0.0205 (18) | 0.041 (2)   | -0.0027 (15) | 0.0206 (16)  | 0.0018 (15)  |
| N4  | 0.0385 (19) | 0.033 (2)   | 0.0266 (17) | 0.0017 (14)  | 0.0128 (14)  | -0.0015 (14) |
| N12 | 0.0359 (17) | 0.034 (2)   | 0.0263 (17) | 0.0016 (14)  | 0.0082 (13)  | -0.0006 (14) |
| N1  | 0.0344 (17) | 0.043 (2)   | 0.0344 (19) | -0.0049 (15) | 0.0085 (14)  | 0.0105 (16)  |
| C6  | 0.0259 (17) | 0.0248 (19) | 0.0199 (16) | 0.0002 (13)  | 0.0057 (13)  | -0.0013 (14) |
| C3  | 0.0320 (19) | 0.027 (2)   | 0.0252 (18) | 0.0011 (15)  | 0.0104 (15)  | 0.0021 (15)  |
| C5  | 0.0294 (17) | 0.0229 (19) | 0.0239 (17) | -0.0004 (14) | 0.0114 (14)  | -0.0018 (14) |
| C1  | 0.0283 (18) | 0.029 (2)   | 0.0299 (19) | -0.0037 (15) | 0.0086 (15)  | 0.0069 (16)  |
| C4  | 0.0345 (19) | 0.025 (2)   | 0.0253 (18) | -0.0006 (15) | 0.0096 (14)  | -0.0028 (15) |
| C2  | 0.0298 (18) | 0.0233 (19) | 0.0297 (19) | 0.0007 (14)  | 0.0080 (14)  | 0.0026 (15)  |
| C7  | 0.0288 (18) | 0.027 (2)   | 0.0241 (17) | 0.0051 (14)  | 0.0088 (14)  | -0.0007 (15) |
| C8  | 0.0320 (18) | 0.0196 (19) | 0.0296 (19) | -0.0017 (14) | 0.0132 (15)  | -0.0025 (15) |

**Table S28.** Geometric parameters (Å, °) for **13**

|         |           |         |           |
|---------|-----------|---------|-----------|
| O20—N10 | 1.225 (4) | O8—N6   | 1.202 (5) |
| O10—N7  | 1.230 (4) | O4—N4   | 1.198 (4) |
| O9—N7   | 1.246 (4) | N2—C1   | 1.313 (5) |
| N7—C3   | 1.390 (5) | N6—C4   | 1.557 (5) |
| O2—N1   | 1.224 (5) | N13—C8  | 1.544 (5) |
| O1—N1   | 1.229 (5) | O15—N12 | 1.203 (5) |
| N3—N2   | 1.351 (4) | N9—H9A  | 0.8800    |
| N3—C3   | 1.400 (5) | N9—H9B  | 0.8800    |
| N3—C4   | 1.401 (5) | N9—C6   | 1.320 (5) |
| O18—N11 | 1.205 (4) | O3—N4   | 1.204 (4) |

|             |           |             |           |
|-------------|-----------|-------------|-----------|
| N10—O19     | 1.238 (4) | O11—N16     | 1.229 (5) |
| N10—C5      | 1.398 (4) | O5—N5       | 1.202 (5) |
| O6—N5       | 1.223 (5) | N16—C7      | 1.439 (5) |
| O12—N16     | 1.214 (4) | N5—C4       | 1.552 (5) |
| N15—N14     | 1.349 (4) | N8—H8A      | 0.8800    |
| N15—C7      | 1.312 (5) | N8—H8B      | 0.8800    |
| N11—O17     | 1.200 (4) | N8—C2       | 1.324 (5) |
| N11—C8      | 1.553 (5) | N4—C4       | 1.550 (5) |
| O13—N13     | 1.202 (4) | N12—C8      | 1.551 (5) |
| O16—N12     | 1.204 (5) | N1—C1       | 1.445 (5) |
| O14—N13     | 1.200 (4) | C6—C5       | 1.383 (5) |
| N14—C5      | 1.402 (5) | C6—C7       | 1.443 (5) |
| N14—C8      | 1.405 (5) | C3—C2       | 1.391 (5) |
| O7—N6       | 1.191 (5) | C1—C2       | 1.433 (5) |
|             |           |             |           |
| O10—N7—O9   | 123.8 (3) | O3—N4—C4    | 115.1 (3) |
| O10—N7—C3   | 117.5 (3) | O16—N12—C8  | 114.4 (3) |
| O9—N7—C3    | 118.7 (3) | O15—N12—O16 | 127.6 (4) |
| N2—N3—C3    | 110.8 (3) | O15—N12—C8  | 117.8 (3) |
| N2—N3—C4    | 119.1 (3) | O2—N1—O1    | 126.7 (4) |
| C3—N3—C4    | 130.1 (3) | O2—N1—C1    | 117.9 (4) |
| O20—N10—O19 | 124.1 (3) | O1—N1—C1    | 115.4 (3) |
| O20—N10—C5  | 117.7 (3) | N9—C6—C5    | 129.6 (3) |
| O19—N10—C5  | 118.1 (3) | N9—C6—C7    | 129.2 (3) |
| C7—N15—N14  | 104.7 (3) | C5—C6—C7    | 101.1 (3) |
| O18—N11—C8  | 117.3 (3) | N7—C3—N3    | 123.0 (3) |
| O17—N11—O18 | 126.3 (4) | N7—C3—C2    | 128.7 (3) |
| O17—N11—C8  | 116.2 (3) | C2—C3—N3    | 108.3 (3) |
| N15—N14—C5  | 111.0 (3) | N10—C5—N14  | 122.7 (3) |
| N15—N14—C8  | 118.7 (3) | C6—C5—N10   | 128.9 (3) |
| C5—N14—C8   | 130.2 (3) | C6—C5—N14   | 108.4 (3) |
| C1—N2—N3    | 104.6 (3) | N2—C1—N1    | 118.9 (3) |
| O7—N6—O8    | 127.7 (4) | N2—C1—C2    | 115.1 (3) |
| O7—N6—C4    | 117.3 (3) | C2—C1—N1    | 125.9 (4) |
| O8—N6—C4    | 115.0 (3) | N3—C4—N6    | 112.2 (3) |
| O13—N13—C8  | 115.8 (3) | N3—C4—N5    | 111.9 (3) |
| O14—N13—O13 | 129.1 (3) | N3—C4—N4    | 109.5 (3) |
| O14—N13—C8  | 115.0 (3) | N5—C4—N6    | 112.4 (3) |
| H9A—N9—H9B  | 120.0     | N4—C4—N6    | 104.8 (3) |

|                |            |                |            |
|----------------|------------|----------------|------------|
| C6—N9—H9A      | 120.0      | N4—C4—N5       | 105.5 (3)  |
| C6—N9—H9B      | 120.0      | N8—C2—C3       | 129.0 (3)  |
| O12—N16—O11    | 125.6 (3)  | N8—C2—C1       | 129.9 (4)  |
| O12—N16—C7     | 118.7 (3)  | C3—C2—C1       | 101.1 (3)  |
| O11—N16—C7     | 115.7 (3)  | N15—C7—N16     | 119.0 (3)  |
| O6—N5—C4       | 114.1 (3)  | N15—C7—C6      | 114.8 (3)  |
| O5—N5—O6       | 127.6 (4)  | N16—C7—C6      | 126.1 (3)  |
| O5—N5—C4       | 118.2 (3)  | N14—C8—N11     | 112.1 (3)  |
| H8A—N8—H8B     | 120.0      | N14—C8—N13     | 108.8 (3)  |
| C2—N8—H8A      | 120.0      | N14—C8—N12     | 112.3 (3)  |
| C2—N8—H8B      | 120.0      | N13—C8—N11     | 105.4 (3)  |
| O4—N4—O3       | 129.0 (3)  | N13—C8—N12     | 105.4 (3)  |
| O4—N4—C4       | 116.0 (3)  | N12—C8—N11     | 112.3 (3)  |
|                |            |                |            |
| O20—N10—C5—N14 | 179.0 (3)  | O4—N4—C4—N3    | -96.0 (4)  |
| O20—N10—C5—C6  | 1.7 (6)    | O4—N4—C4—N6    | 143.4 (4)  |
| O10—N7—C3—N3   | 179.2 (3)  | O4—N4—C4—N5    | 24.5 (5)   |
| O10—N7—C3—C2   | -2.2 (6)   | N2—N3—C3—N7    | 177.5 (3)  |
| O9—N7—C3—N3    | -0.8 (6)   | N2—N3—C3—C2    | -1.3 (4)   |
| O9—N7—C3—C2    | 177.8 (4)  | N2—N3—C4—N6    | 117.1 (3)  |
| N7—C3—C2—N8    | 2.7 (7)    | N2—N3—C4—N5    | -115.5 (3) |
| N7—C3—C2—C1    | -177.4 (4) | N2—N3—C4—N4    | 1.1 (5)    |
| O2—N1—C1—N2    | 4.8 (5)    | N2—C1—C2—N8    | 178.9 (4)  |
| O2—N1—C1—C2    | -175.8 (4) | N2—C1—C2—C3    | -1.0 (4)   |
| O1—N1—C1—N2    | -175.4 (4) | O15—N12—C8—N11 | 39.2 (4)   |
| O1—N1—C1—C2    | 4.0 (6)    | O15—N12—C8—N14 | 166.6 (3)  |
| N3—N2—C1—N1    | 179.8 (3)  | O15—N12—C8—N13 | -75.1 (4)  |
| N3—N2—C1—C2    | 0.3 (4)    | N9—C6—C5—N10   | -2.3 (7)   |
| N3—C3—C2—N8    | -178.7 (4) | N9—C6—C5—N14   | -179.9 (4) |
| N3—C3—C2—C1    | 1.3 (4)    | N9—C6—C7—N15   | 179.8 (4)  |
| O18—N11—C8—N14 | -178.8 (3) | N9—C6—C7—N16   | 2.2 (6)    |
| O18—N11—C8—N13 | 62.9 (4)   | O3—N4—C4—N3    | 84.3 (4)   |
| O18—N11—C8—N12 | -51.3 (4)  | O3—N4—C4—N6    | -36.3 (4)  |
| O6—N5—C4—N3    | 18.9 (4)   | O3—N4—C4—N5    | -155.2 (3) |
| O6—N5—C4—N6    | 146.2 (3)  | O11—N16—C7—N15 | -179.6 (4) |
| O6—N5—C4—N4    | -100.2 (4) | O11—N16—C7—C6  | -2.2 (6)   |
| O12—N16—C7—N15 | -0.7 (5)   | O5—N5—C4—N3    | -165.1 (4) |
| O12—N16—C7—C6  | 176.7 (4)  | O5—N5—C4—N6    | -37.8 (5)  |
| N15—N14—C5—N10 | -177.7 (3) | O5—N5—C4—N4    | 75.9 (4)   |

|                |            |                |            |
|----------------|------------|----------------|------------|
| N15—N14—C5—C6  | 0.1 (4)    | O17—N11—C8—N14 | 5.1 (5)    |
| N15—N14—C8—N11 | -115.7 (3) | O17—N11—C8—N13 | -113.1 (4) |
| N15—N14—C8—N13 | 0.5 (5)    | O17—N11—C8—N12 | 132.7 (4)  |
| N15—N14—C8—N12 | 116.7 (3)  | N1—C1—C2—N8    | -0.5 (7)   |
| O13—N13—C8—N11 | -146.0 (3) | N1—C1—C2—C3    | 179.6 (4)  |
| O13—N13—C8—N14 | 93.6 (4)   | C3—N3—N2—C1    | 0.6 (4)    |
| O13—N13—C8—N12 | -27.0 (4)  | C3—N3—C4—N6    | -61.7 (5)  |
| O19—N10—C5—N14 | -1.0 (6)   | C3—N3—C4—N5    | 65.7 (5)   |
| O19—N10—C5—C6  | -178.3 (4) | C3—N3—C4—N4    | -177.6 (4) |
| O16—N12—C8—N11 | -144.8 (3) | C5—N14—C8—N11  | 61.5 (5)   |
| O16—N12—C8—N14 | -17.3 (4)  | C5—N14—C8—N13  | 177.7 (3)  |
| O16—N12—C8—N13 | 100.9 (4)  | C5—N14—C8—N12  | -66.1 (5)  |
| O14—N13—C8—N11 | 35.8 (4)   | C5—C6—C7—N15   | -0.3 (4)   |
| O14—N13—C8—N14 | -84.6 (4)  | C5—C6—C7—N16   | -177.8 (4) |
| O14—N13—C8—N12 | 154.8 (3)  | C4—N3—N2—C1    | -178.4 (3) |
| N14—N15—C7—N16 | 178.0 (3)  | C4—N3—C3—N7    | -3.7 (6)   |
| N14—N15—C7—C6  | 0.3 (4)    | C4—N3—C3—C2    | 177.5 (4)  |
| O7—N6—C4—N3    | 178.6 (3)  | C7—N15—N14—C5  | -0.2 (4)   |
| O7—N6—C4—N5    | 51.5 (4)   | C7—N15—N14—C8  | 177.5 (3)  |
| O7—N6—C4—N4    | -62.6 (4)  | C7—C6—C5—N10   | 177.7 (4)  |
| O8—N6—C4—N3    | -4.7 (5)   | C7—C6—C5—N14   | 0.1 (4)    |
| O8—N6—C4—N5    | -131.8 (4) | C8—N14—C5—N10  | 5.0 (6)    |
| O8—N6—C4—N4    | 114.1 (4)  | C8—N14—C5—C6   | -177.3 (4) |

## 8. Single-crystal X-ray diffraction analysis of **14**

**Table S29.** Crystal data, data collection, and refinement for **14**

|                                                 |                                                         |
|-------------------------------------------------|---------------------------------------------------------|
| C <sub>4</sub> ClN <sub>7</sub> O <sub>10</sub> | $F(000) = 680$                                          |
| $M_r = 341.56$                                  | $D_x = 1.859 \text{ Mg m}^{-3}$                         |
| Monoclinic, $P2_1/c$                            | Mo $K\alpha$ radiation, $\lambda = 0.71073 \text{ \AA}$ |
| $a = 13.9214 (7) \text{ \AA}$                   | Cell parameters from 5926 reflections                   |
| $b = 6.9287 (3) \text{ \AA}$                    | $\theta = 2.9\text{--}27.2^\circ$                       |
| $c = 13.9386 (7) \text{ \AA}$                   | $\mu = 0.39 \text{ mm}^{-1}$                            |
| $\beta = 114.823 (2)^\circ$                     | $T = 296 \text{ K}$                                     |
| $V = 1220.26 (10) \text{ \AA}^3$                | Block, colourless                                       |
| $Z = 4$                                         | $0.12 \times 0.11 \times 0.08 \text{ mm}$               |
| Bruker D8 QUEST PHOTON 100 diffractometer       | 1831 reflections with $I > 2\sigma(I)$                  |



|                                                     |                                                                                                                            |
|-----------------------------------------------------|----------------------------------------------------------------------------------------------------------------------------|
| Detector resolution: 10.42 pixels mm <sup>-1</sup>  | $R_{\text{int}} = 0.031$                                                                                                   |
| $\phi$ and $\omega$ scans                           | $\theta_{\text{max}} = 25.0^\circ$ , $\theta_{\text{min}} = 3.4^\circ$                                                     |
| Absorption correction: multi-scan<br><i>SADABS</i>  | $h = -15 \rightarrow 16$                                                                                                   |
| $T_{\text{min}} = 0.531$ , $T_{\text{max}} = 0.746$ | $k = -8 \rightarrow 8$                                                                                                     |
| 10861 measured reflections                          | $l = -16 \rightarrow 16$                                                                                                   |
| 2136 independent reflections                        |                                                                                                                            |
| Refinement on $F^2$                                 | 0 restraints                                                                                                               |
| Least-squares matrix: full                          | $w = 1/[\sigma^2(F_o^2) + (0.118P)^2 + 0.818P]$<br>where $P = (F_o^2 + 2F_c^2)/3$                                          |
| $R[F^2 > 2\sigma(F^2)] = 0.061$                     | $(\Delta/\sigma)_{\text{max}} < 0.001$                                                                                     |
| $wR(F^2) = 0.187$                                   | $\Delta_{\text{max}} = 0.76 \text{ e } \text{\AA}^{-3}$                                                                    |
| $S = 1.09$                                          | $\Delta_{\text{min}} = -0.30 \text{ e } \text{\AA}^{-3}$                                                                   |
| 2136 reflections                                    | Extinction correction: <i>SHELXL2018/1</i><br>(Sheldrick 2018),<br>$F_c^* = kFc[1 + 0.001x\lambda^3/\sin(2\theta)]^{-1/4}$ |
| 200 parameters                                      | Extinction coefficient: 0.054 (10)                                                                                         |

**Table S30.** Fractional atomic coordinates and isotropic or equivalent isotropic displacement parameters ( $\text{\AA}^2$ ) for **14**

|     | <i>x</i>    | <i>y</i>     | <i>z</i>    | $U_{\text{iso}}^*/U_{\text{eq}}$ |
|-----|-------------|--------------|-------------|----------------------------------|
| C1  | 0.7808 (3)  | 0.4114 (5)   | 0.6219 (3)  | 0.0521 (9)                       |
| C2  | 0.8529 (3)  | 0.4078 (5)   | 0.7291 (3)  | 0.0464 (8)                       |
| C3  | 0.8161 (2)  | 0.5412 (5)   | 0.7775 (2)  | 0.0430 (8)                       |
| C4  | 0.6566 (3)  | 0.7557 (5)   | 0.7068 (3)  | 0.0496 (8)                       |
| C11 | 0.86687 (6) | 0.61957 (12) | 0.90697 (5) | 0.0450 (4)                       |
| N1  | 0.7036 (2)  | 0.5323 (5)   | 0.6024 (2)  | 0.0525 (8)                       |
| N2  | 0.7264 (2)  | 0.6146 (4)   | 0.6992 (2)  | 0.0471 (7)                       |
| N3  | 0.7784 (3)  | 0.2903 (6)   | 0.5360 (3)  | 0.0710 (10)                      |
| N4  | 0.9478 (2)  | 0.2969 (5)   | 0.7736 (3)  | 0.0621 (9)                       |
| N5  | 0.7052 (3)  | 0.9581 (5)   | 0.7286 (3)  | 0.0593 (8)                       |
| N6  | 0.6197 (2)  | 0.7009 (5)   | 0.7929 (3)  | 0.0619 (9)                       |
| N7  | 0.5581 (3)  | 0.7666 (5)   | 0.6012 (3)  | 0.0663 (10)                      |
| O1  | 0.7926 (5)  | 0.3652 (7)   | 0.4675 (3)  | 0.1257 (19)                      |
| O2  | 0.7597 (4)  | 0.1209 (6)   | 0.5397 (4)  | 0.1143 (15)                      |
| O3  | 0.9745 (3)  | 0.2139 (6)   | 0.7124 (3)  | 0.1005 (12)                      |
| O4  | 0.9943 (3)  | 0.2869 (6)   | 0.8677 (3)  | 0.0958 (12)                      |
| O5  | 0.6090 (3)  | 0.5290 (5)   | 0.8020 (3)  | 0.0869 (10)                      |
| O6  | 0.6040 (3)  | 0.8285 (6)   | 0.8420 (3)  | 0.1010 (12)                      |

|     |            |            |            |             |
|-----|------------|------------|------------|-------------|
| O7  | 0.7988 (3) | 0.9695 (4) | 0.7579 (3) | 0.0761 (9)  |
| O8  | 0.6431 (3) | 1.0889 (5) | 0.7136 (3) | 0.0922 (11) |
| O9  | 0.4788 (3) | 0.6924 (7) | 0.5983 (3) | 0.1032 (13) |
| O10 | 0.5726 (3) | 0.8510 (6) | 0.5320 (3) | 0.0912 (12) |

**Table S31.** Atomic displacement parameters ( $\text{\AA}^2$ ) for **14**

|     | $U^{11}$    | $U^{22}$    | $U^{33}$    | $U^{12}$     | $U^{13}$     | $U^{23}$     |
|-----|-------------|-------------|-------------|--------------|--------------|--------------|
| C1  | 0.056 (2)   | 0.049 (2)   | 0.053 (2)   | 0.0074 (15)  | 0.0244 (17)  | -0.0001 (15) |
| C2  | 0.0401 (16) | 0.0427 (17) | 0.053 (2)   | 0.0015 (13)  | 0.0163 (15)  | 0.0024 (14)  |
| C3  | 0.0359 (15) | 0.0454 (18) | 0.0422 (17) | -0.0027 (13) | 0.0110 (13)  | 0.0040 (14)  |
| C4  | 0.0480 (18) | 0.0458 (19) | 0.052 (2)   | 0.0053 (14)  | 0.0179 (15)  | -0.0037 (15) |
| C11 | 0.0430 (5)  | 0.0540 (6)  | 0.0313 (5)  | -0.0003 (3)  | 0.0091 (3)   | 0.0019 (3)   |
| N1  | 0.0542 (17) | 0.0533 (18) | 0.0421 (16) | 0.0098 (13)  | 0.0125 (13)  | -0.0046 (13) |
| N2  | 0.0435 (14) | 0.0454 (16) | 0.0482 (17) | 0.0063 (11)  | 0.0152 (12)  | -0.0028 (12) |
| N3  | 0.084 (2)   | 0.073 (3)   | 0.057 (2)   | 0.0252 (19)  | 0.0305 (19)  | 0.0002 (18)  |
| N4  | 0.0430 (16) | 0.061 (2)   | 0.074 (2)   | 0.0078 (14)  | 0.0161 (16)  | 0.0085 (17)  |
| N5  | 0.067 (2)   | 0.0487 (19) | 0.0613 (19) | 0.0063 (16)  | 0.0263 (16)  | 0.0008 (15)  |
| N6  | 0.0511 (18) | 0.070 (2)   | 0.067 (2)   | 0.0050 (15)  | 0.0267 (16)  | -0.0028 (17) |
| N7  | 0.058 (2)   | 0.064 (2)   | 0.059 (2)   | 0.0197 (16)  | 0.0078 (16)  | -0.0056 (17) |
| O1  | 0.199 (5)   | 0.118 (4)   | 0.090 (3)   | 0.047 (3)    | 0.090 (4)    | 0.015 (2)    |
| O2  | 0.162 (4)   | 0.079 (3)   | 0.119 (3)   | -0.001 (2)   | 0.075 (3)    | -0.037 (2)   |
| O3  | 0.083 (2)   | 0.114 (3)   | 0.115 (3)   | 0.049 (2)    | 0.051 (2)    | 0.007 (2)    |
| O4  | 0.073 (2)   | 0.095 (3)   | 0.082 (2)   | 0.0282 (18)  | -0.0032 (17) | 0.0067 (19)  |
| O5  | 0.084 (2)   | 0.076 (2)   | 0.109 (3)   | -0.0107 (17) | 0.048 (2)    | 0.0125 (19)  |
| O6  | 0.127 (3)   | 0.105 (3)   | 0.100 (3)   | 0.011 (2)    | 0.075 (3)    | -0.013 (2)   |
| O7  | 0.0671 (19) | 0.0607 (18) | 0.092 (2)   | -0.0107 (14) | 0.0252 (16)  | 0.0047 (15)  |
| O8  | 0.106 (3)   | 0.0513 (18) | 0.119 (3)   | 0.0223 (17)  | 0.047 (2)    | -0.0055 (17) |
| O9  | 0.0517 (18) | 0.112 (3)   | 0.112 (3)   | -0.0005 (19) | 0.0018 (17)  | -0.015 (2)   |
| O10 | 0.103 (3)   | 0.094 (3)   | 0.0585 (19) | 0.048 (2)    | 0.0171 (18)  | 0.0125 (17)  |

**Table S32.** Geometric parameters ( $\text{\AA}$ ,  $^\circ$ ) for **14**

|       |           |       |           |
|-------|-----------|-------|-----------|
| C1—N1 | 1.299 (5) | N1—N2 | 1.374 (4) |
| C1—C2 | 1.407 (5) | N3—O1 | 1.174 (5) |
| C1—N3 | 1.451 (5) | N3—O2 | 1.208 (6) |
| C2—C3 | 1.364 (5) | N4—O4 | 1.196 (5) |
| C2—N4 | 1.426 (5) | N4—O3 | 1.209 (5) |
| C3—N2 | 1.366 (4) | N5—O7 | 1.194 (4) |

|              |            |             |            |
|--------------|------------|-------------|------------|
| C3—C11       | 1.727 (3)  | N5—O8       | 1.208 (5)  |
| C4—N2        | 1.413 (4)  | N6—O6       | 1.193 (5)  |
| C4—N5        | 1.531 (5)  | N6—O5       | 1.213 (5)  |
| C4—N7        | 1.535 (5)  | N7—O9       | 1.203 (5)  |
| C4—N6        | 1.538 (5)  | N7—O10      | 1.216 (5)  |
|              |            |             |            |
| N1—C1—C2     | 113.1 (3)  | C3—N2—C4    | 128.7 (3)  |
| N1—C1—N3     | 118.0 (3)  | N1—N2—C4    | 118.5 (3)  |
| C2—C1—N3     | 128.7 (3)  | O1—N3—O2    | 125.3 (4)  |
| C3—C2—C1     | 105.4 (3)  | O1—N3—C1    | 117.6 (4)  |
| C3—C2—N4     | 128.4 (3)  | O2—N3—C1    | 117.2 (4)  |
| C1—C2—N4     | 126.1 (3)  | O4—N4—O3    | 124.1 (4)  |
| C2—C3—N2     | 105.3 (3)  | O4—N4—C2    | 119.0 (4)  |
| C2—C3—C11    | 131.0 (3)  | O3—N4—C2    | 116.9 (3)  |
| N2—C3—C11    | 123.6 (3)  | O7—N5—O8    | 127.5 (4)  |
| N2—C4—N5     | 112.8 (3)  | O7—N5—C4    | 117.1 (3)  |
| N2—C4—N7     | 109.1 (3)  | O8—N5—C4    | 115.4 (3)  |
| N5—C4—N7     | 106.7 (3)  | O6—N6—O5    | 127.4 (4)  |
| N2—C4—N6     | 110.6 (3)  | O6—N6—C4    | 117.8 (4)  |
| N5—C4—N6     | 109.6 (3)  | O5—N6—C4    | 114.8 (3)  |
| N7—C4—N6     | 107.7 (3)  | O9—N7—O10   | 129.4 (4)  |
| C1—N1—N2     | 103.4 (3)  | O9—N7—C4    | 116.7 (4)  |
| C3—N2—N1     | 112.7 (3)  | O10—N7—C4   | 113.9 (4)  |
|              |            |             |            |
| N1—C1—C2—C3  | -1.1 (4)   | N1—C1—N3—O2 | -108.3 (5) |
| N3—C1—C2—C3  | -176.0 (4) | C2—C1—N3—O2 | 66.5 (6)   |
| N1—C1—C2—N4  | -176.9 (3) | C3—C2—N4—O4 | 15.3 (6)   |
| N3—C1—C2—N4  | 8.1 (7)    | C1—C2—N4—O4 | -169.9 (4) |
| C1—C2—C3—N2  | 0.3 (4)    | C3—C2—N4—O3 | -166.7 (4) |
| N4—C2—C3—N2  | 176.0 (3)  | C1—C2—N4—O3 | 8.2 (6)    |
| C1—C2—C3—C11 | -177.4 (3) | N2—C4—N5—O7 | -15.0 (5)  |
| N4—C2—C3—C11 | -1.7 (6)   | N7—C4—N5—O7 | -134.9 (3) |
| C2—C1—N1—N2  | 1.3 (4)    | N6—C4—N5—O7 | 108.8 (4)  |
| N3—C1—N1—N2  | 176.8 (3)  | N2—C4—N5—O8 | 164.8 (4)  |
| C2—C3—N2—N1  | 0.5 (4)    | N7—C4—N5—O8 | 45.0 (4)   |
| C11—C3—N2—N1 | 178.4 (2)  | N6—C4—N5—O8 | -71.3 (4)  |
| C2—C3—N2—C4  | 179.0 (3)  | N2—C4—N6—O6 | 146.3 (4)  |
| C11—C3—N2—C4 | -3.0 (5)   | N5—C4—N6—O6 | 21.2 (5)   |
| C1—N1—N2—C3  | -1.1 (4)   | N7—C4—N6—O6 | -94.5 (4)  |

|             |            |              |            |
|-------------|------------|--------------|------------|
| C1—N1—N2—C4 | -179.8 (3) | N2—C4—N6—O5  | -34.4 (4)  |
| N5—C4—N2—C3 | 70.5 (4)   | N5—C4—N6—O5  | -159.5 (3) |
| N7—C4—N2—C3 | -171.0 (3) | N7—C4—N6—O5  | 84.8 (4)   |
| N6—C4—N2—C3 | -52.7 (4)  | N2—C4—N7—O9  | 104.0 (4)  |
| N5—C4—N2—N1 | -111.0 (3) | N5—C4—N7—O9  | -133.8 (4) |
| N7—C4—N2—N1 | 7.5 (4)    | N6—C4—N7—O9  | -16.1 (5)  |
| N6—C4—N2—N1 | 125.8 (3)  | N2—C4—N7—O10 | -76.0 (4)  |
| N1—C1—N3—O1 | 70.2 (6)   | N5—C4—N7—O10 | 46.2 (4)   |
| C2—C1—N3—O1 | -115.1 (5) | N6—C4—N7—O10 | 163.8 (3)  |

## 9. Single-crystal X-ray diffraction analysis of $15 \cdot 2\text{H}_2\text{O}$

**Table S33.** Crystal data, data collection, and refinement for  $15 \cdot 2\text{H}_2\text{O}$

|                                                              |                                                                                     |
|--------------------------------------------------------------|-------------------------------------------------------------------------------------|
| $\text{C}_4\text{N}_6\text{O}_9 \cdot 2(\text{H}_2\text{O})$ | $Z = 2$                                                                             |
| $M_r = 312.13$                                               | $F(000) = 316$                                                                      |
| Triclinic, $P\bar{1}$                                        | $D_x = 1.794 \text{ Mg m}^{-3}$                                                     |
| $a = 7.6403 (9) \text{ \AA}$                                 | Mo $K\alpha$ radiation, $\lambda = 0.71073 \text{ \AA}$                             |
| $b = 7.7898 (8) \text{ \AA}$                                 | Cell parameters from 4206 reflections                                               |
| $c = 11.2231 (11) \text{ \AA}$                               | $\theta = 3.0\text{--}26.8^\circ$                                                   |
| $\alpha = 78.002 (3)^\circ$                                  | $\mu = 0.18 \text{ mm}^{-1}$                                                        |
| $\beta = 80.654 (3)^\circ$                                   | $T = 296 \text{ K}$                                                                 |
| $\gamma = 62.508 (3)^\circ$                                  | Plate, colourless                                                                   |
| $V = 577.88 (11) \text{ \AA}^3$                              | $0.22 \times 0.20 \times 0.03 \text{ mm}$                                           |
| Bruker D8 QUEST PHOTON 100 diffractometer                    | 1961 reflections with $I > 2\sigma(I)$                                              |
| Detector resolution: $10.42 \text{ pixels mm}^{-1}$          | $R_{\text{int}} = 0.028$                                                            |
| $\phi$ and $\omega$ scans                                    | $\theta_{\text{max}} = 27.5^\circ$ , $\theta_{\text{min}} = 3.0^\circ$              |
| Absorption correction: multi-scan <i>SADABS</i>              | $h = -9 \rightarrow 9$                                                              |
| $T_{\text{min}} = 0.631$ , $T_{\text{max}} = 0.746$          | $k = -10 \rightarrow 9$                                                             |
| 8706 measured reflections                                    | $l = -14 \rightarrow 14$                                                            |
| 2639 independent reflections                                 |                                                                                     |
| Refinement on $F^2$                                          | 6 restraints                                                                        |
| Least-squares matrix: full                                   | Hydrogen site location: difference Fourier map                                      |
| $R[F^2 > 2\sigma(F^2)] = 0.054$                              | Only H-atom coordinates refined                                                     |
| $wR(F^2) = 0.147$                                            | $w = 1/[\sigma^2(F_o^2) + (0.0713P)^2 + 0.5042P]$<br>where $P = (F_o^2 + 2F_c^2)/3$ |
| $S = 1.02$                                                   | $(\Delta/\sigma)_{\text{max}} < 0.001$                                              |
| 2639 reflections                                             | $\Delta_{\text{max}} = 0.38 \text{ e \AA}^{-3}$                                     |

|                |                                                        |
|----------------|--------------------------------------------------------|
| 202 parameters | $\Delta\rho_{\min} = -0.37 \text{ e } \text{\AA}^{-3}$ |
|----------------|--------------------------------------------------------|

**Table S34.** Fractional atomic coordinates and isotropic or equivalent isotropic displacement parameters ( $\text{\AA}^2$ ) for **15·2H<sub>2</sub>O**

|      | <i>x</i>   | <i>y</i>   | <i>z</i>      | $U_{\text{iso}}^*/U_{\text{eq}}$ |
|------|------------|------------|---------------|----------------------------------|
| C1   | 0.9612 (3) | 0.7240 (3) | 0.0761 (2)    | 0.0240 (5)                       |
| C2   | 0.7715 (3) | 0.7555 (3) | 0.0558 (2)    | 0.0259 (5)                       |
| C3   | 0.6757 (3) | 0.7354 (3) | 0.1737 (2)    | 0.0266 (5)                       |
| C4   | 0.7948 (4) | 0.6591 (3) | 0.3764 (2)    | 0.0299 (5)                       |
| N1   | 0.8187 (3) | 0.6963 (3) | 0.25047 (17)  | 0.0293 (4)                       |
| N2   | 0.9955 (3) | 0.6881 (3) | 0.19044 (17)  | 0.0288 (4)                       |
| N3   | 1.1174 (3) | 0.7343 (3) | -0.01405 (17) | 0.0295 (4)                       |
| N4   | 0.6931 (3) | 0.7819 (3) | -0.05420 (18) | 0.0301 (5)                       |
| N6   | 0.7630 (3) | 0.8027 (3) | 0.44295 (19)  | 0.0331 (5)                       |
| N7   | 0.7956 (3) | 0.4813 (3) | 0.42937 (18)  | 0.0331 (5)                       |
| O1   | 1.2850 (3) | 0.6064 (3) | 0.00065 (19)  | 0.0489 (5)                       |
| O2   | 1.0725 (3) | 0.8684 (3) | -0.09956 (16) | 0.0443 (5)                       |
| O3   | 0.8060 (3) | 0.7482 (3) | -0.14808 (16) | 0.0424 (5)                       |
| O4   | 0.5146 (3) | 0.8306 (3) | -0.05326 (18) | 0.0412 (5)                       |
| O5   | 0.8278 (3) | 0.3628 (3) | 0.35990 (18)  | 0.0458 (5)                       |
| O6   | 0.7649 (4) | 0.4420 (3) | 0.54070 (17)  | 0.0588 (6)                       |
| O7   | 0.7391 (4) | 0.7795 (3) | 0.55571 (17)  | 0.0539 (6)                       |
| O8   | 0.7664 (3) | 0.9568 (3) | 0.38450 (19)  | 0.0490 (5)                       |
| O9   | 0.5131 (3) | 0.7385 (3) | 0.21142 (16)  | 0.0371 (4)                       |
| O10  | 0.4755 (4) | 0.3746 (4) | 0.2479 (2)    | 0.0585 (6)                       |
| H10A | 0.501 (6)  | 0.474 (5)  | 0.238 (4)     | 0.088*                           |
| H10B | 0.384 (5)  | 0.384 (6)  | 0.306 (3)     | 0.088*                           |
| O11  | 0.1637 (4) | 0.9556 (3) | 0.3381 (2)    | 0.0620 (6)                       |
| H11A | 0.278 (4)  | 0.902 (6)  | 0.294 (3)     | 0.093*                           |
| H11B | 0.158 (6)  | 0.862 (5)  | 0.394 (3)     | 0.093*                           |

**Table S35.** Atomic displacement parameters ( $\text{\AA}^2$ ) for **15·2H<sub>2</sub>O**

|    | $U^{11}$    | $U^{22}$    | $U^{33}$    | $U^{12}$     | $U^{13}$    | $U^{23}$    |
|----|-------------|-------------|-------------|--------------|-------------|-------------|
| C1 | 0.0256 (11) | 0.0194 (10) | 0.0243 (11) | -0.0104 (8)  | 0.0031 (9)  | -0.0006 (8) |
| C2 | 0.0275 (11) | 0.0239 (10) | 0.0249 (11) | -0.0110 (9)  | 0.0002 (9)  | -0.0032 (8) |
| C3 | 0.0274 (12) | 0.0253 (11) | 0.0267 (11) | -0.0122 (9)  | 0.0021 (9)  | -0.0053 (9) |
| C4 | 0.0400 (14) | 0.0323 (12) | 0.0210 (11) | -0.0205 (10) | 0.0020 (10) | -0.0034 (9) |

|     |             |             |             |              |             |              |
|-----|-------------|-------------|-------------|--------------|-------------|--------------|
| N1  | 0.0300 (11) | 0.0387 (11) | 0.0207 (9)  | -0.0192 (9)  | 0.0026 (8)  | -0.0014 (8)  |
| N2  | 0.0295 (11) | 0.0334 (10) | 0.0247 (10) | -0.0178 (8)  | 0.0020 (8)  | -0.0005 (8)  |
| N3  | 0.0345 (11) | 0.0290 (10) | 0.0275 (10) | -0.0190 (9)  | 0.0047 (8)  | -0.0032 (8)  |
| N4  | 0.0400 (12) | 0.0222 (9)  | 0.0294 (11) | -0.0148 (8)  | -0.0047 (9) | -0.0023 (7)  |
| N6  | 0.0373 (12) | 0.0360 (11) | 0.0322 (11) | -0.0232 (9)  | 0.0048 (9)  | -0.0067 (9)  |
| N7  | 0.0394 (12) | 0.0305 (10) | 0.0295 (11) | -0.0176 (9)  | 0.0005 (9)  | -0.0023 (8)  |
| O1  | 0.0288 (10) | 0.0436 (11) | 0.0596 (13) | -0.0128 (8)  | 0.0101 (9)  | 0.0040 (9)   |
| O2  | 0.0537 (12) | 0.0459 (11) | 0.0319 (10) | -0.0284 (9)  | 0.0010 (8)  | 0.0089 (8)   |
| O3  | 0.0597 (13) | 0.0507 (11) | 0.0234 (9)  | -0.0312 (10) | 0.0037 (8)  | -0.0081 (8)  |
| O4  | 0.0372 (11) | 0.0386 (10) | 0.0491 (11) | -0.0141 (8)  | -0.0123 (8) | -0.0088 (8)  |
| O5  | 0.0560 (13) | 0.0341 (10) | 0.0511 (12) | -0.0205 (9)  | -0.0009 (9) | -0.0155 (8)  |
| O6  | 0.1023 (18) | 0.0429 (11) | 0.0304 (11) | -0.0393 (12) | 0.0076 (11) | 0.0040 (8)   |
| O7  | 0.0882 (17) | 0.0658 (14) | 0.0283 (10) | -0.0525 (13) | 0.0107 (10) | -0.0163 (9)  |
| O8  | 0.0631 (13) | 0.0338 (10) | 0.0550 (12) | -0.0302 (10) | 0.0080 (10) | -0.0048 (9)  |
| O9  | 0.0289 (9)  | 0.0430 (10) | 0.0403 (10) | -0.0186 (8)  | 0.0080 (7)  | -0.0100 (8)  |
| O10 | 0.0734 (16) | 0.0716 (15) | 0.0473 (13) | -0.0479 (13) | 0.0105 (11) | -0.0168 (11) |
| O11 | 0.0644 (15) | 0.0491 (13) | 0.0646 (15) | -0.0252 (11) | 0.0138 (12) | -0.0067 (11) |

**Table S36.** Geometric parameters (Å, °) for **15·2H<sub>2</sub>O**

|          |             |          |             |
|----------|-------------|----------|-------------|
| C1—N2    | 1.299 (3)   | N3—O2    | 1.220 (3)   |
| C1—C2    | 1.403 (3)   | N4—O4    | 1.235 (3)   |
| C1—N3    | 1.455 (3)   | N4—O3    | 1.238 (3)   |
| C2—N4    | 1.395 (3)   | N6—O7    | 1.236 (3)   |
| C2—C3    | 1.421 (3)   | N6—O8    | 1.252 (3)   |
| C3—O9    | 1.236 (3)   | N7—O6    | 1.234 (3)   |
| C3—N1    | 1.385 (3)   | N7—O5    | 1.244 (3)   |
| C4—N6    | 1.380 (3)   | O10—H10A | 0.863 (18)  |
| C4—N1    | 1.382 (3)   | O10—H10B | 0.863 (18)  |
| C4—N7    | 1.386 (3)   | O11—H11A | 0.887 (19)  |
| N1—N2    | 1.388 (3)   | O11—H11B | 0.869 (18)  |
| N3—O1    | 1.217 (3)   |          |             |
|          |             |          |             |
| N2—C1—C2 | 114.5 (2)   | C1—N2—N1 | 102.84 (18) |
| N2—C1—N3 | 117.3 (2)   | O1—N3—O2 | 124.3 (2)   |
| C2—C1—N3 | 128.1 (2)   | O1—N3—C1 | 117.34 (18) |
| N4—C2—C1 | 129.1 (2)   | O2—N3—C1 | 118.34 (19) |
| N4—C2—C3 | 125.1 (2)   | O4—N4—O3 | 122.4 (2)   |
| C1—C2—C3 | 105.53 (19) | O4—N4—C2 | 118.5 (2)   |

|             |             |               |            |
|-------------|-------------|---------------|------------|
| O9—C3—N1    | 123.1 (2)   | O3—N4—C2      | 119.0 (2)  |
| O9—C3—C2    | 134.1 (2)   | O7—N6—O8      | 120.7 (2)  |
| N1—C3—C2    | 102.69 (19) | O7—N6—C4      | 122.1 (2)  |
| N6—C4—N1    | 118.8 (2)   | O8—N6—C4      | 117.1 (2)  |
| N6—C4—N7    | 123.2 (2)   | O6—N7—O5      | 121.2 (2)  |
| N1—C4—N7    | 117.9 (2)   | O6—N7—C4      | 121.6 (2)  |
| C4—N1—C3    | 123.9 (2)   | O5—N7—C4      | 117.3 (2)  |
| C4—N1—N2    | 121.59 (19) | H10A—O10—H10B | 110 (3)    |
| C3—N1—N2    | 114.40 (18) | H11A—O11—H11B | 106 (3)    |
|             |             |               |            |
| N2—C1—C2—N4 | -174.4 (2)  | C4—N1—N2—C1   | 177.7 (2)  |
| N3—C1—C2—N4 | 8.2 (4)     | C3—N1—N2—C1   | 0.5 (2)    |
| N2—C1—C2—C3 | -0.4 (3)    | N2—C1—N3—O1   | 45.7 (3)   |
| N3—C1—C2—C3 | -177.7 (2)  | C2—C1—N3—O1   | -137.0 (2) |
| N4—C2—C3—O9 | -1.6 (4)    | N2—C1—N3—O2   | -135.0 (2) |
| C1—C2—C3—O9 | -176.0 (2)  | C2—C1—N3—O2   | 42.3 (3)   |
| N4—C2—C3—N1 | 175.0 (2)   | C1—C2—N4—O4   | -171.6 (2) |
| C1—C2—C3—N1 | 0.6 (2)     | C3—C2—N4—O4   | 15.4 (3)   |
| N6—C4—N1—C3 | -105.6 (3)  | C1—C2—N4—O3   | 11.2 (3)   |
| N7—C4—N1—C3 | 71.8 (3)    | C3—C2—N4—O3   | -161.8 (2) |
| N6—C4—N1—N2 | 77.5 (3)    | N1—C4—N6—O7   | 179.5 (2)  |
| N7—C4—N1—N2 | -105.2 (3)  | N7—C4—N6—O7   | 2.4 (4)    |
| O9—C3—N1—C4 | -0.8 (3)    | N1—C4—N6—O8   | -3.0 (3)   |
| C2—C3—N1—C4 | -177.9 (2)  | N7—C4—N6—O8   | 179.8 (2)  |
| O9—C3—N1—N2 | 176.4 (2)   | N6—C4—N7—O6   | 1.0 (4)    |
| C2—C3—N1—N2 | -0.7 (2)    | N1—C4—N7—O6   | -176.2 (2) |
| C2—C1—N2—N1 | -0.1 (2)    | N6—C4—N7—O5   | -179.3 (2) |
| N3—C1—N2—N1 | 177.58 (17) | N1—C4—N7—O5   | 3.5 (3)    |

## 10. NMR spectra

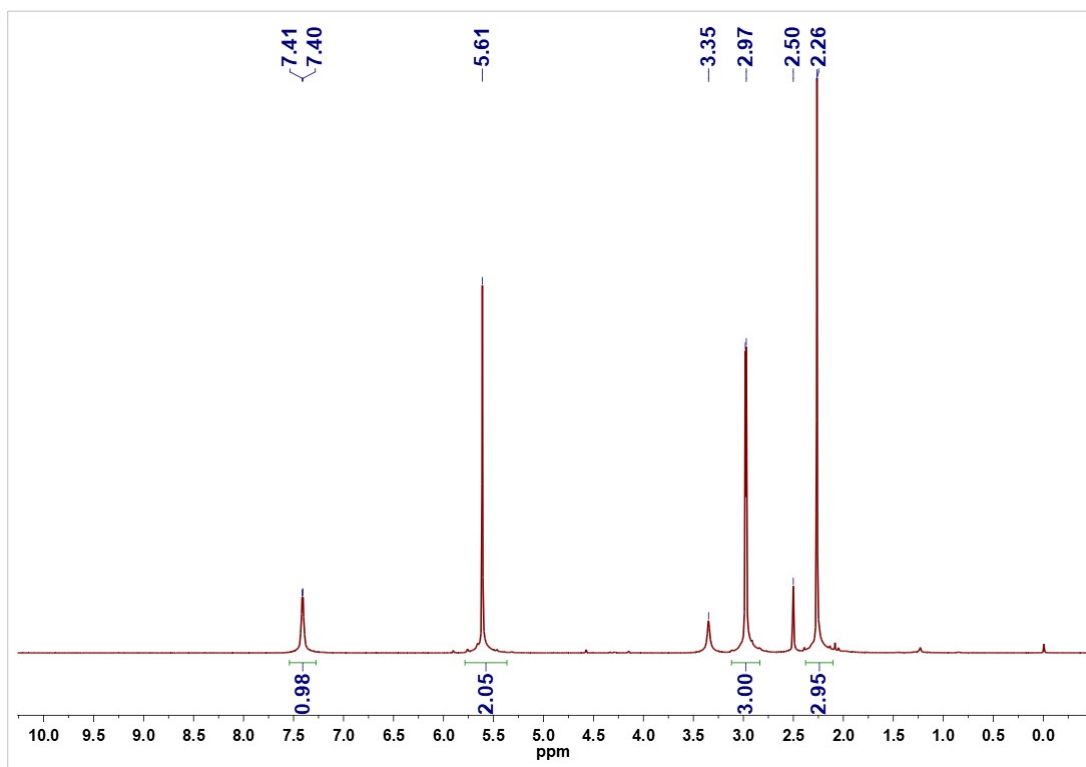

**Fig. S7** <sup>1</sup>H NMR spectrum of **5** in d<sub>6</sub>-DMSO.

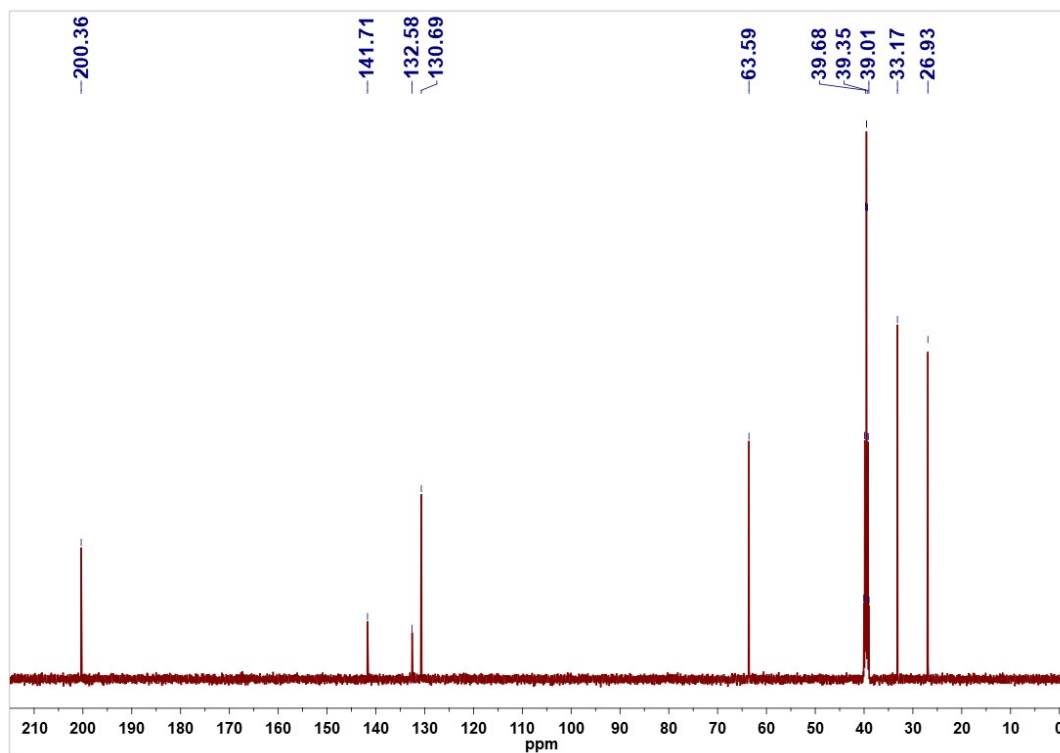

**Fig. S8** <sup>13</sup>C NMR spectrum of **5** in d<sub>6</sub>-DMSO.



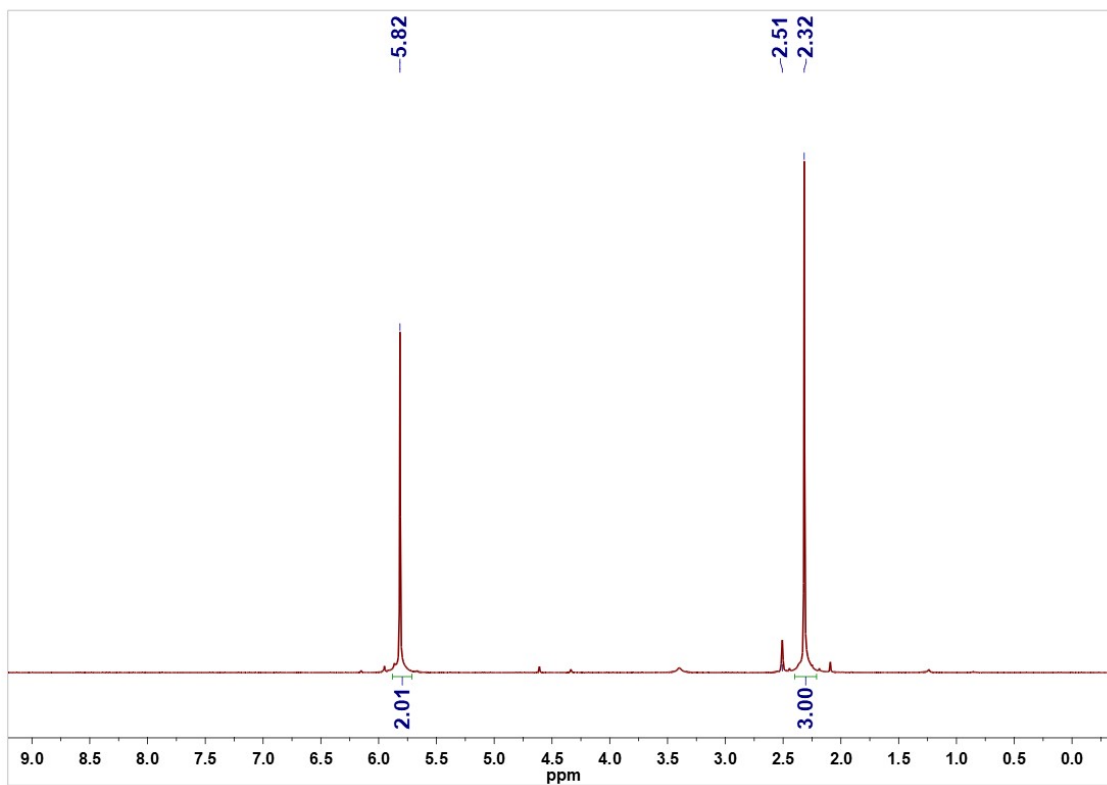

**Fig. S9**  $^1\text{H}$  NMR spectrum of **6** in  $d_6$ -DMSO.

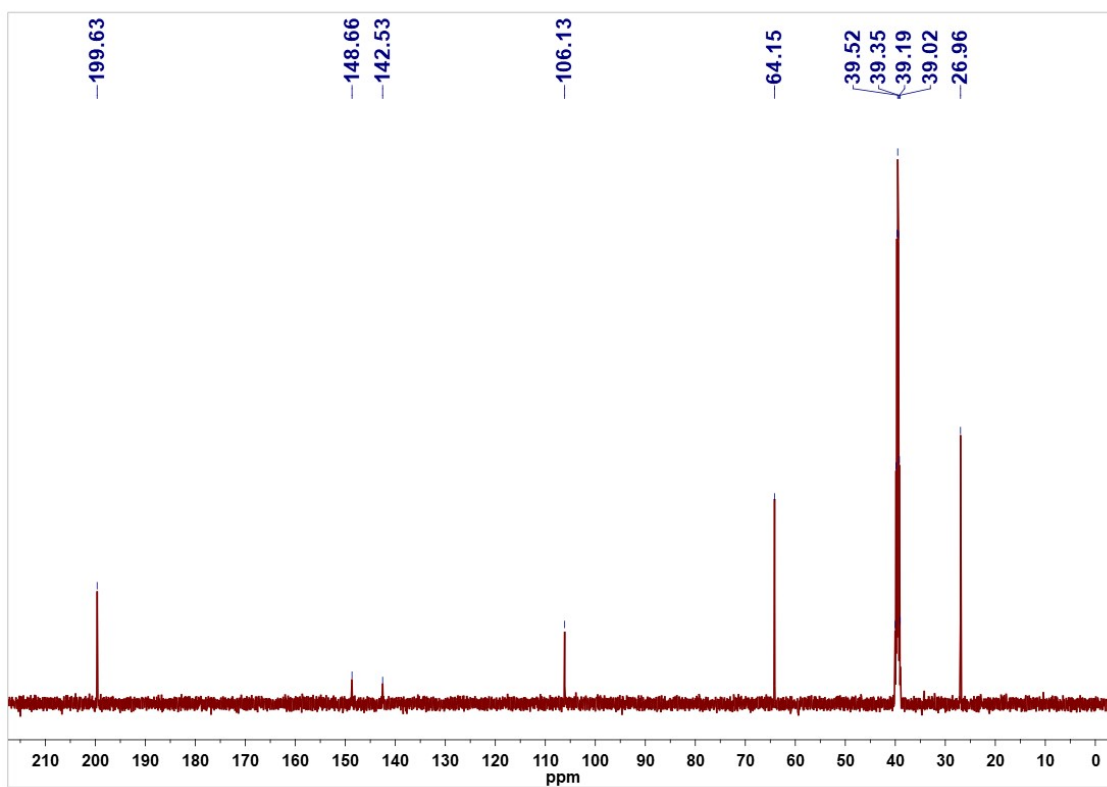

**Fig. S10**  $^{13}\text{C}$  NMR spectrum of **6** in  $d_6$ -DMSO.

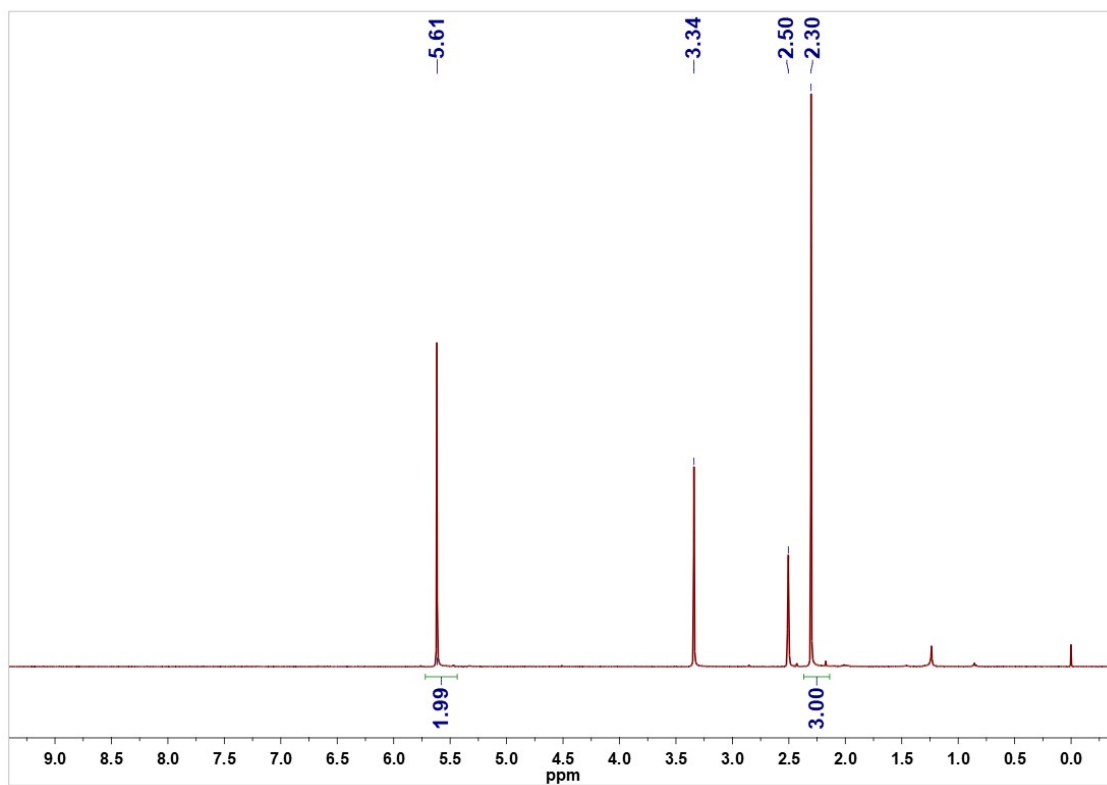

**Fig. S11**  $^1\text{H}$  NMR spectrum of **8** in  $\text{d}_6\text{-DMSO}$ .

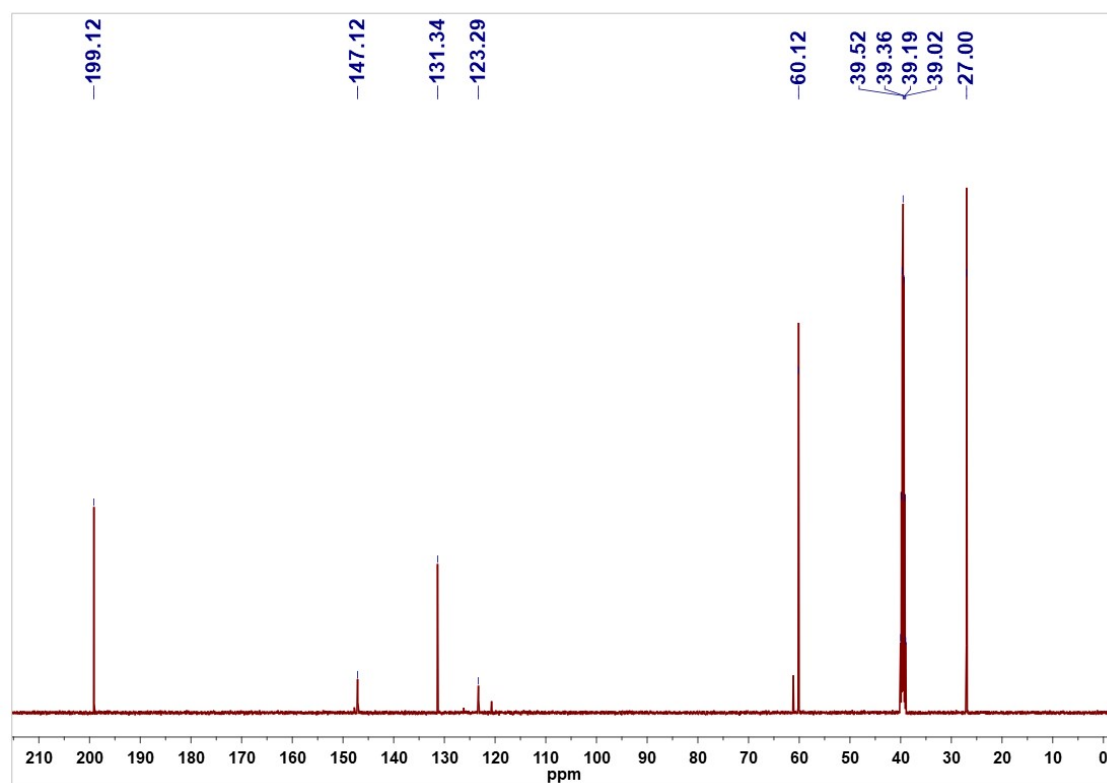

**Fig. S12**  $^{13}\text{C}$  NMR spectrum of **8** in  $\text{d}_6\text{-DMSO}$ .

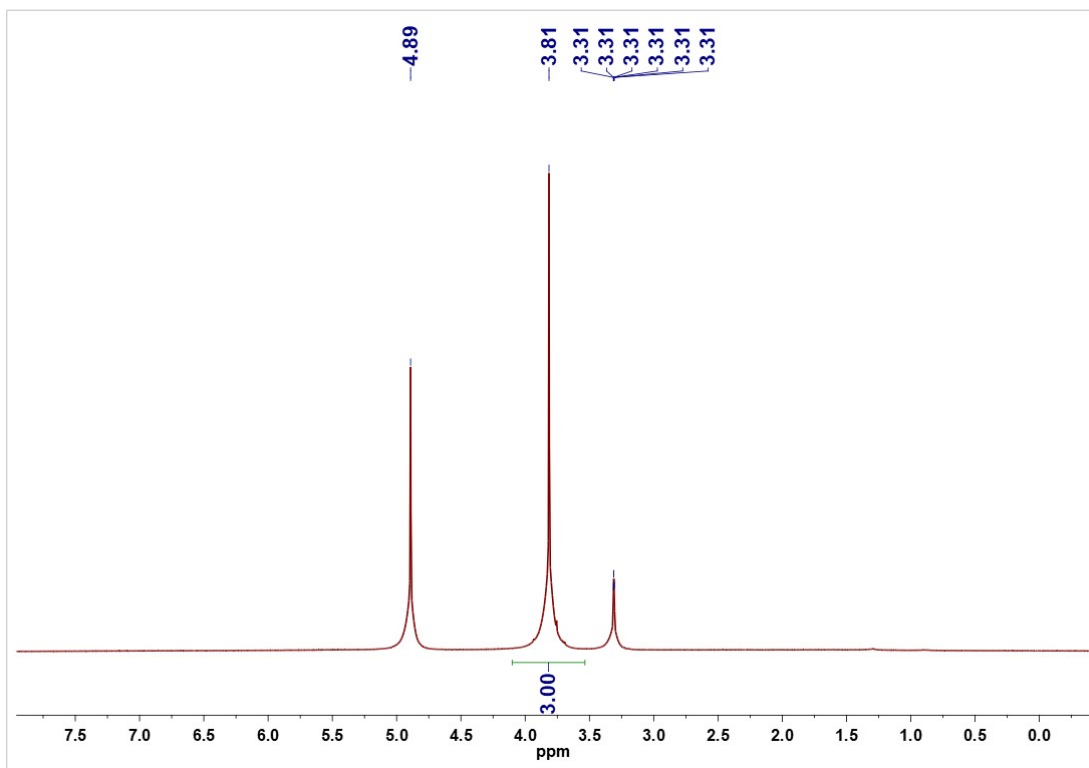

**Fig. S13**  $^1\text{H}$  NMR spectrum of **10** in  $\text{CD}_3\text{OD}$ .

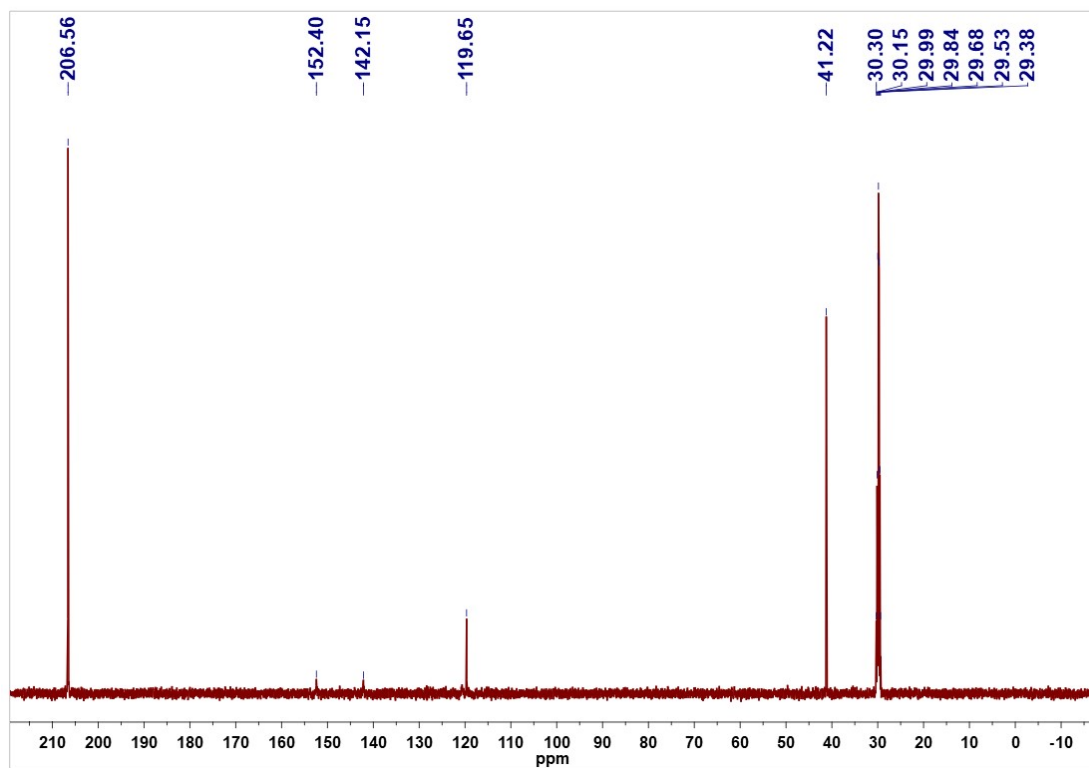

**Fig. S14**  $^{13}\text{C}$  NMR spectrum of **10** in  $d_6$ -Acetone.

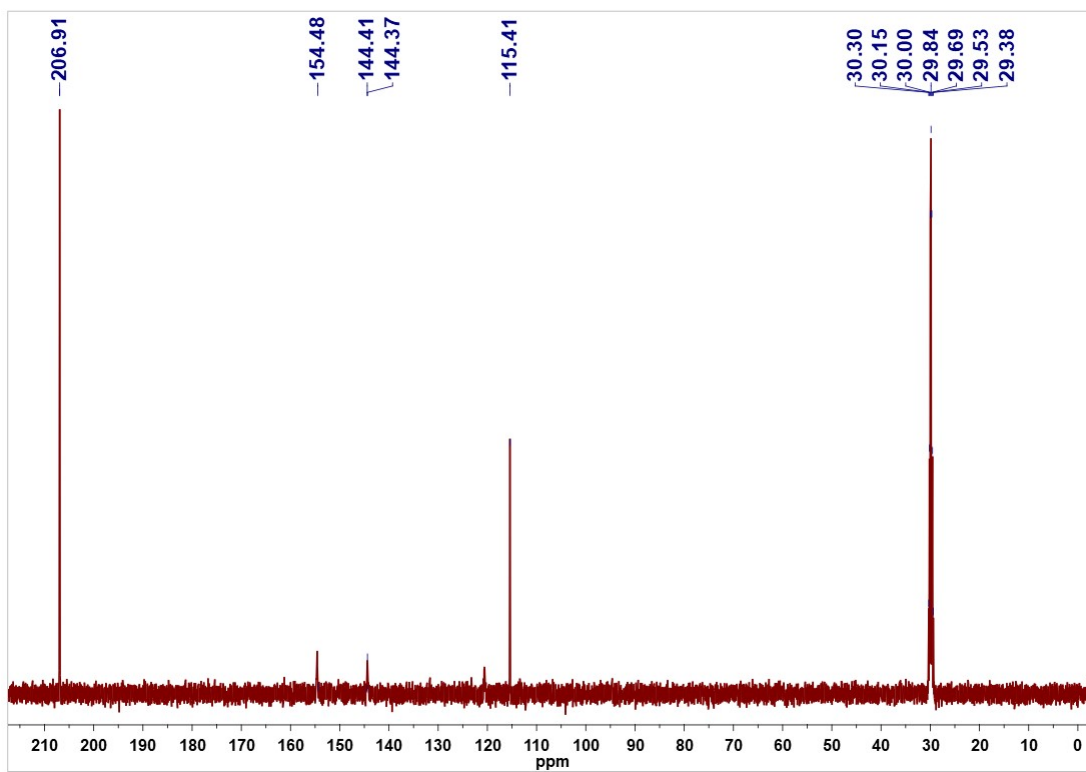

Fig. S15  $^{13}\text{C}$  NMR spectrum of **11** in  $d_6$ -Acetone.

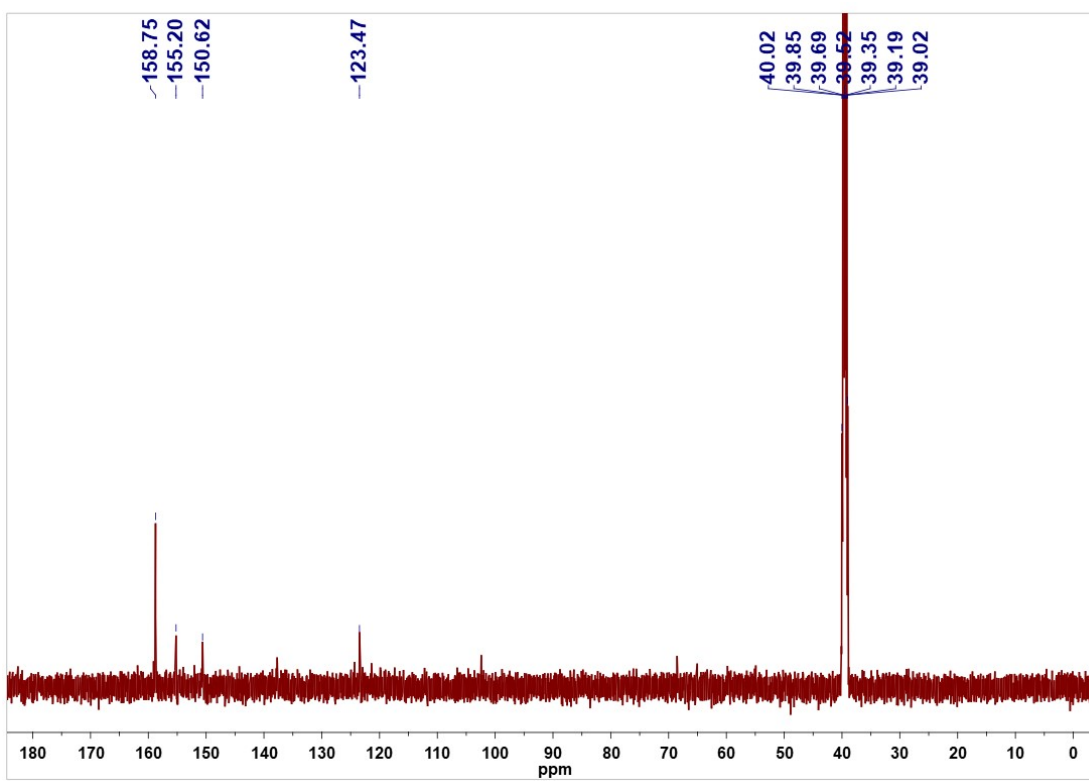

Fig. S16  $^{13}\text{C}$  NMR spectrum of **12** in  $d_6$ -DMSO.

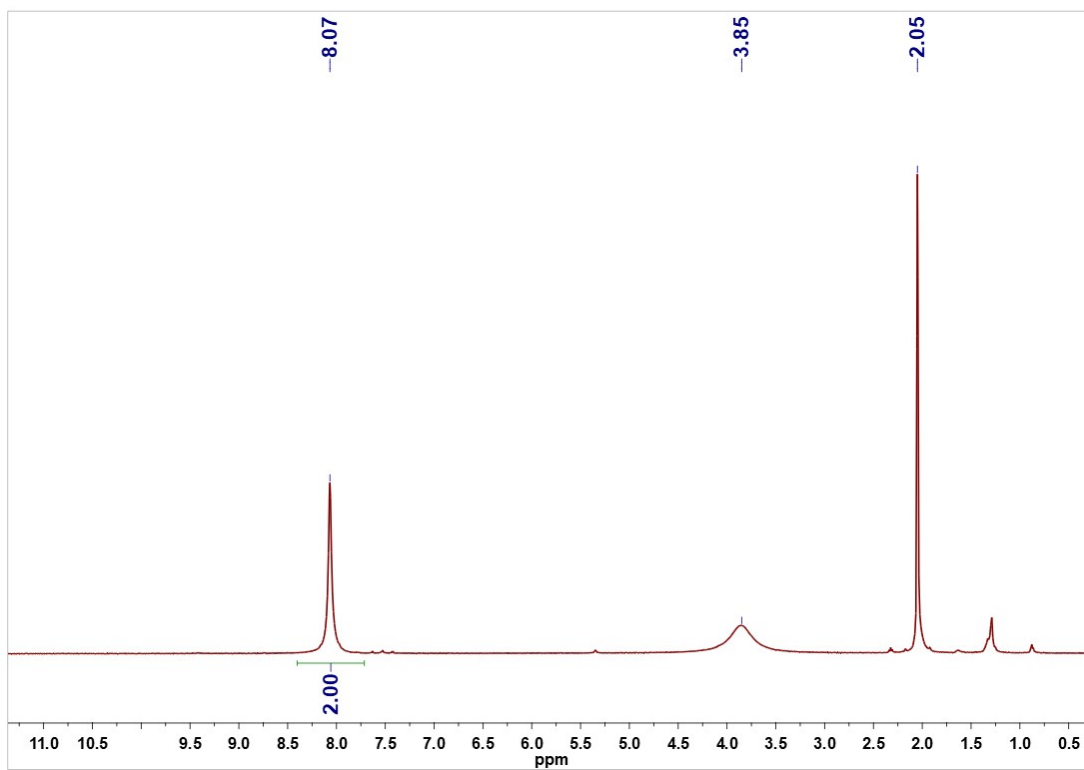

Fig. S17  $^1\text{H}$  NMR spectrum of **13** in  $d_6$ -Acetone.

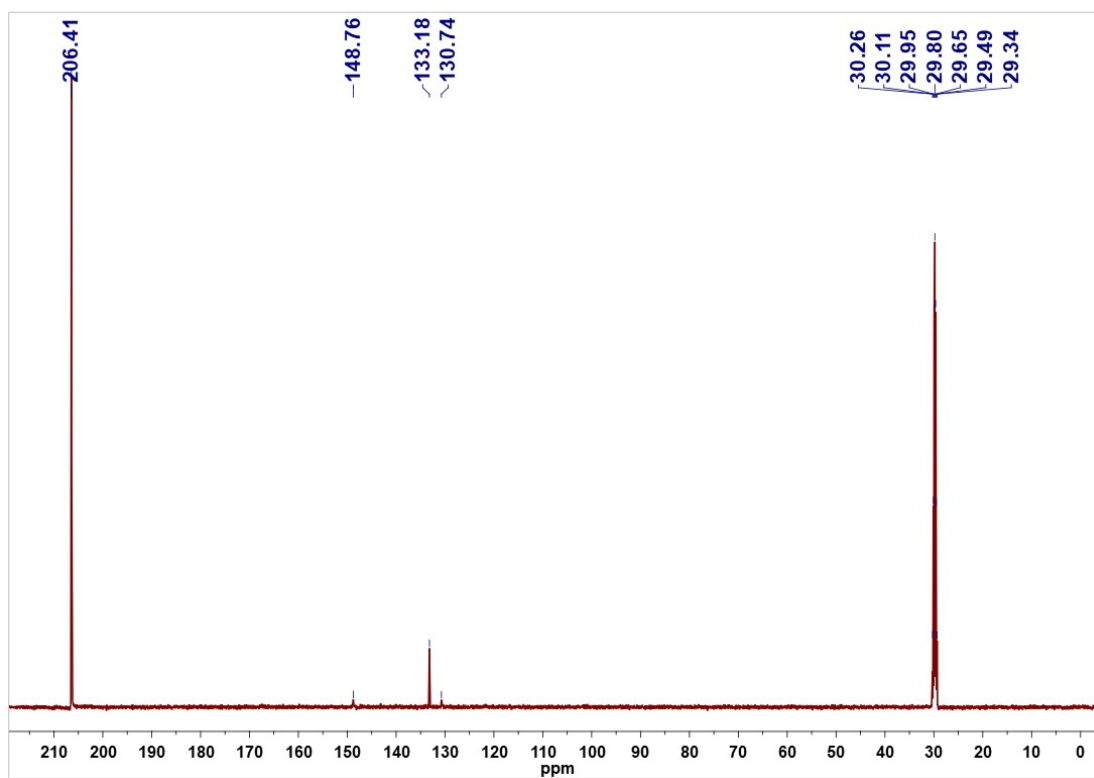

Fig. S18  $^{13}\text{C}$  NMR spectrum of **13** in  $d_6$ -Acetone.

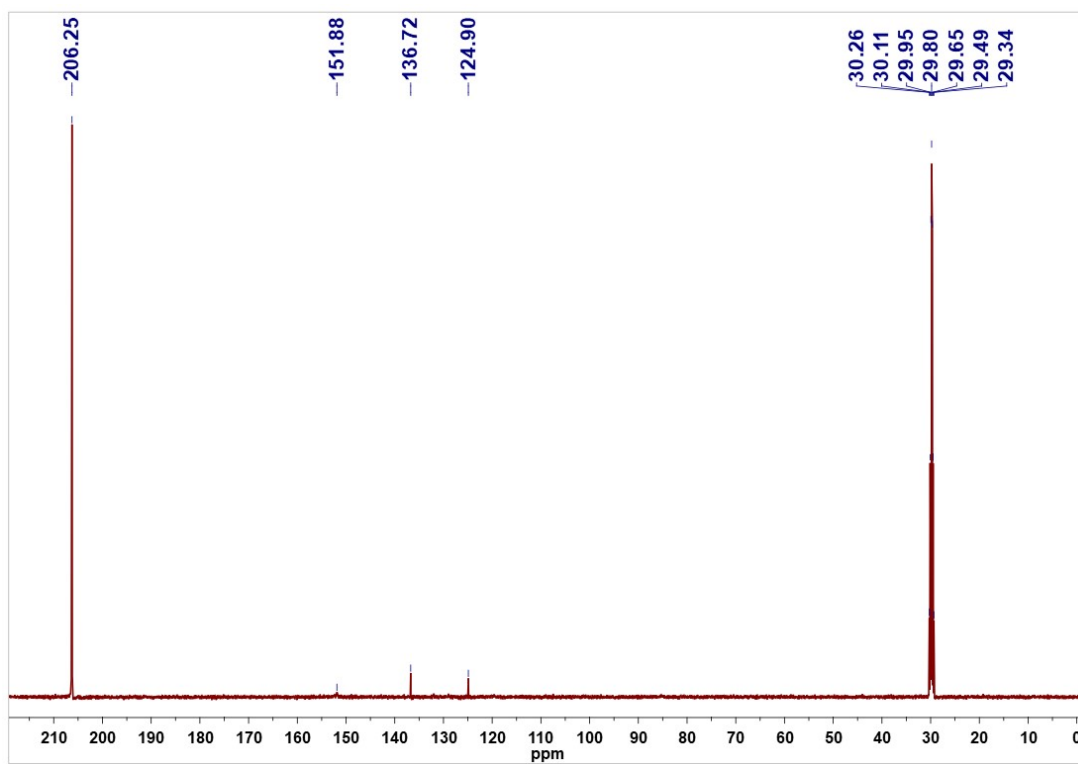

**Fig. S19**  $^{13}\text{C}$  NMR spectrum of **14** in  $\text{d}_6$ -Acetone.

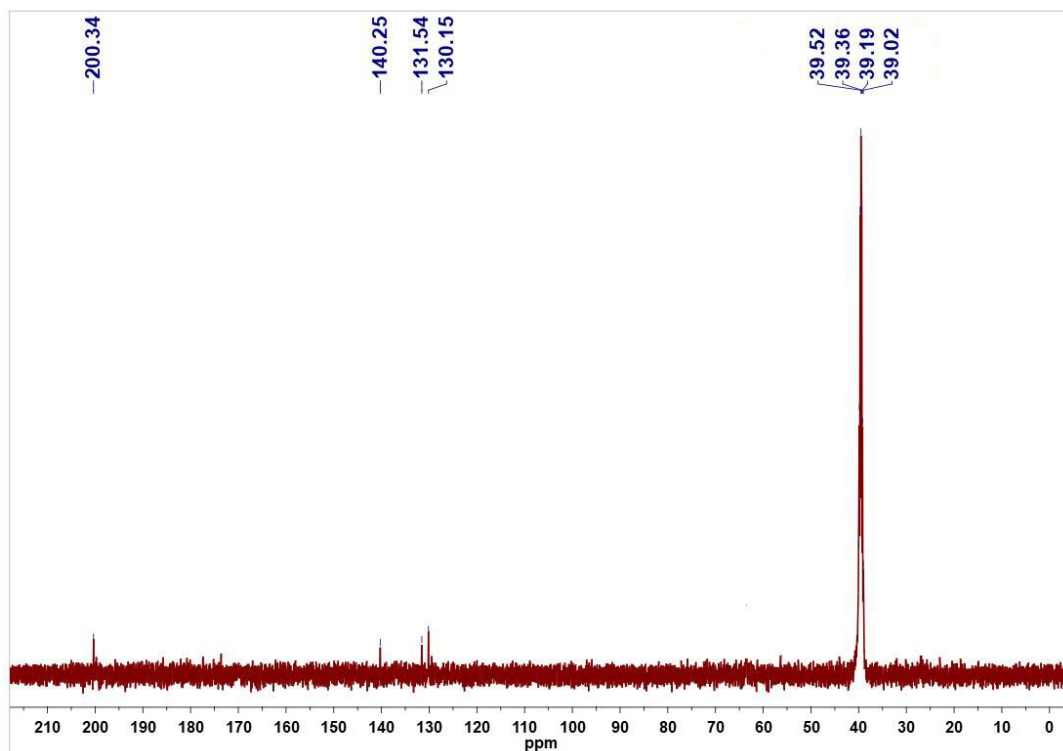

**Fig. S20**  $^{13}\text{C}$  NMR spectrum of **15** in  $\text{d}_6$ -DMSO.

# 11. IR spectra

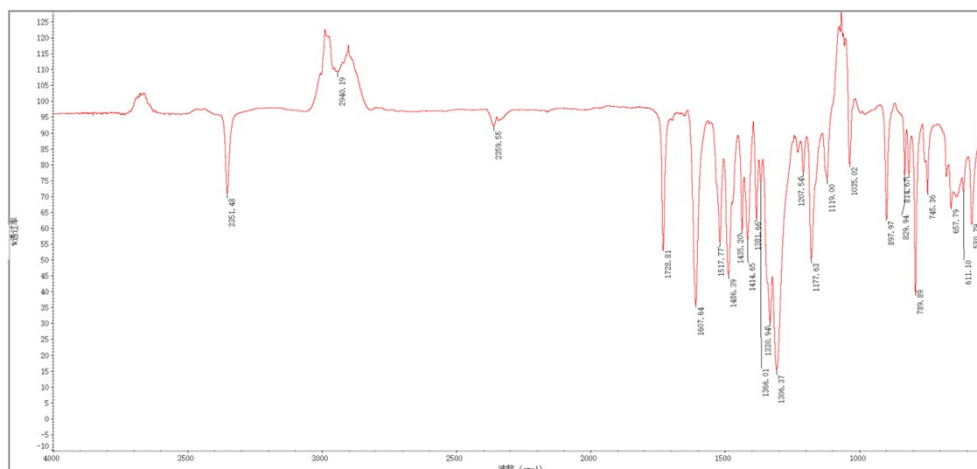

Fig. S21 IR spectrum of 5.

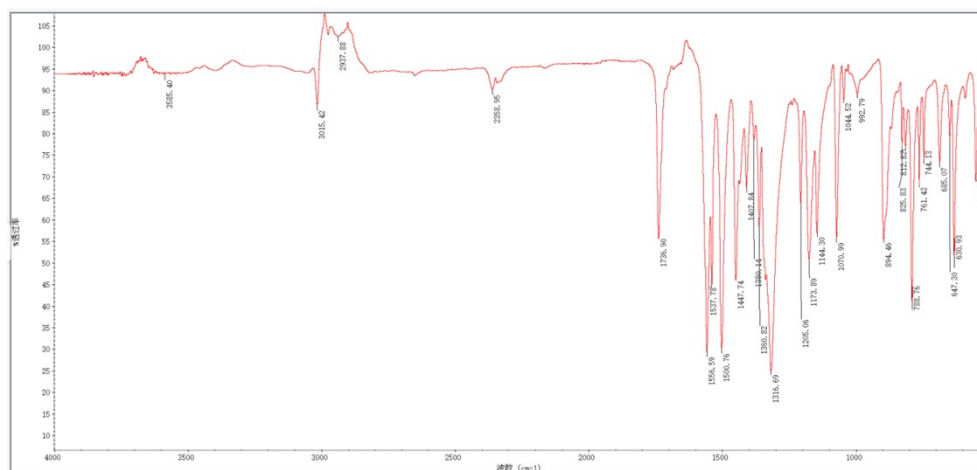

Fig. S22 IR spectrum of 6.

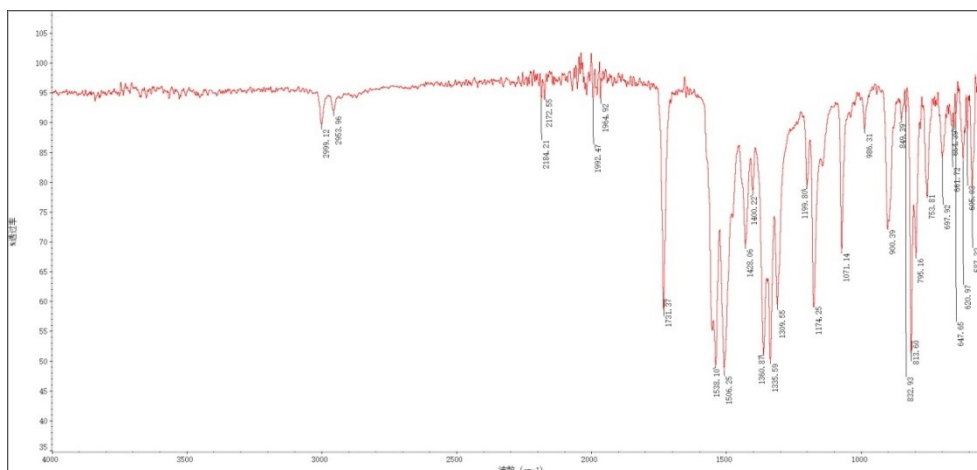

Fig. S23 IR spectrum of 8.

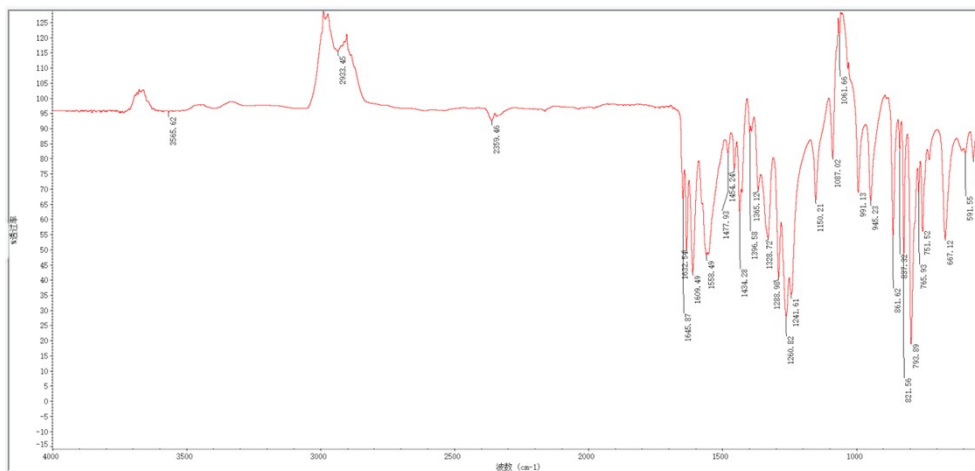

Fig. S24 IR spectrum of 10.

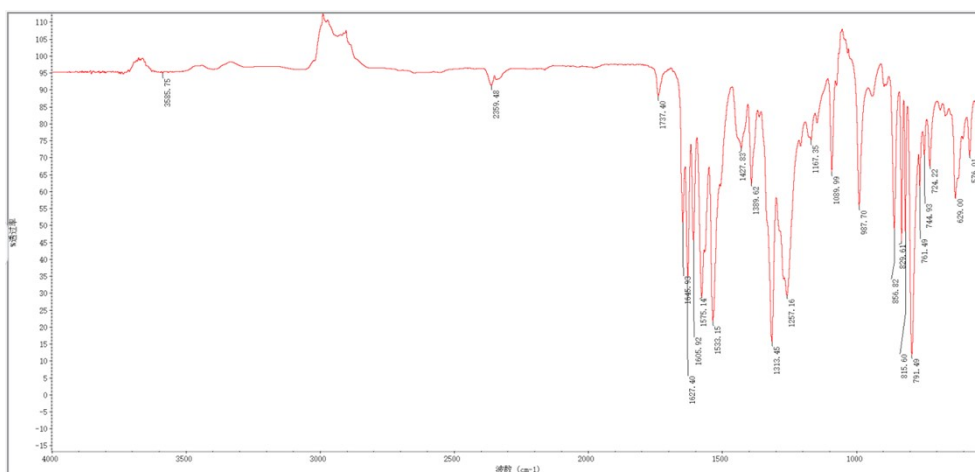

Fig. S25 IR spectrum of 11.

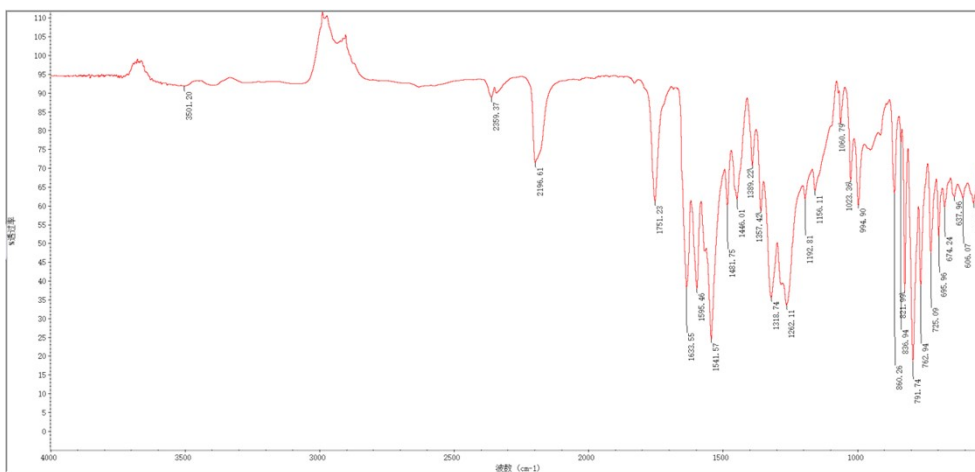

Fig. S26 IR spectrum of 12.



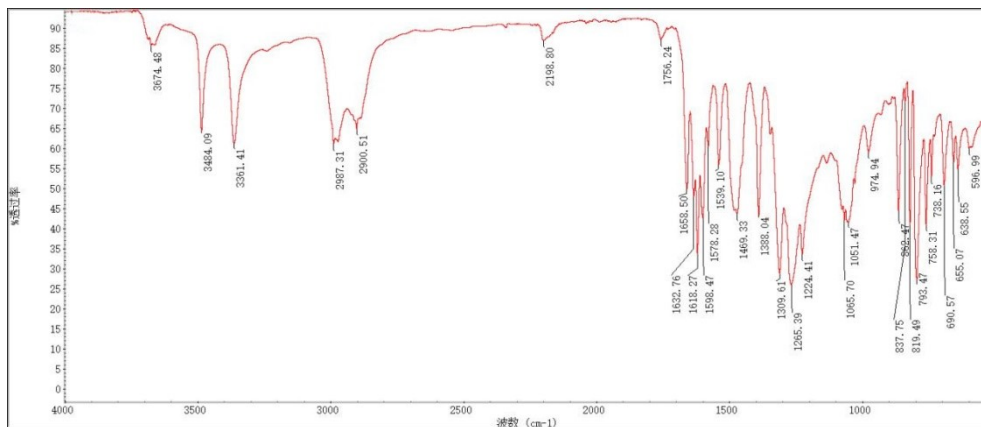

Fig. S27 IR spectrum of 13.

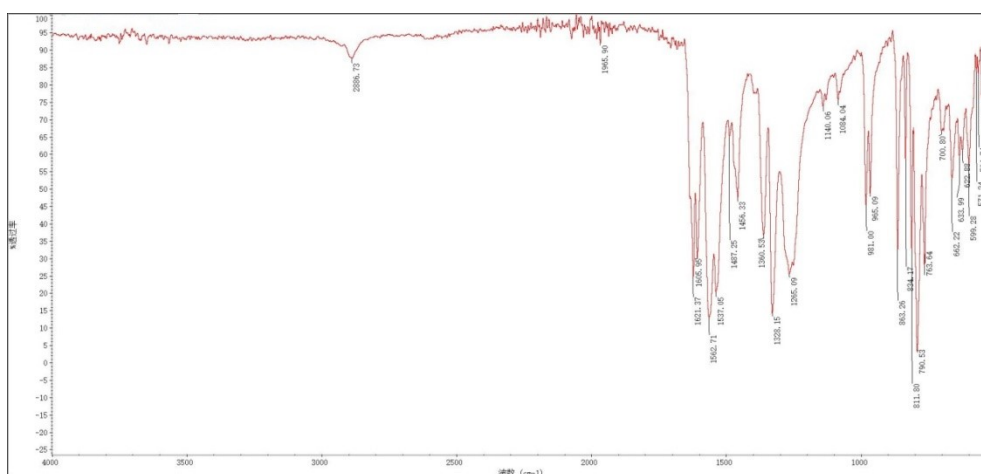

Fig. S28 IR spectrum of 14.

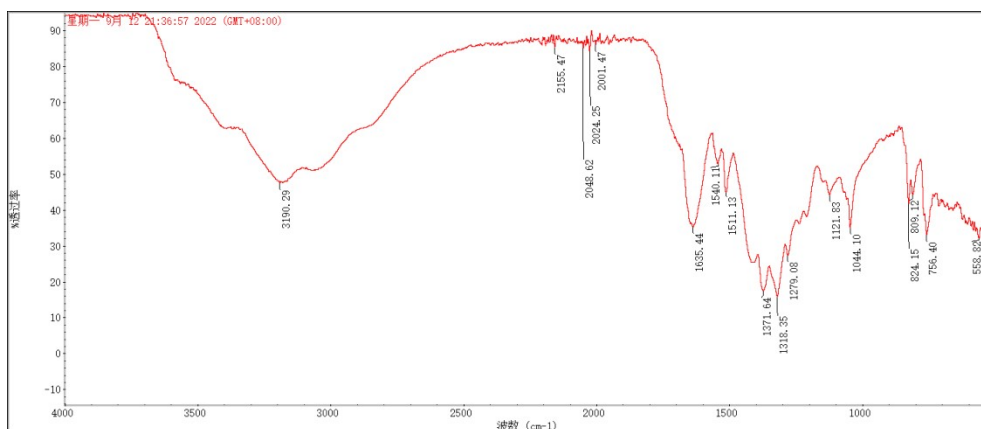

Fig. S29 IR spectrum of 15.

## 12. General methods

### 12.1 Calculation details

All of the *ab initio* calculations involved in this work were carried out using the Gaussian 09 suite of programs.<sup>1</sup> The geometric optimization and frequency analyses of the structures are based on available single-crystal structures and using the B3LYP functional with the 6-31++G(d,p) basis set. The geometrical configurations were optimized with no constraints imposed under default convergence criteria. All of the optimized structures were characterized to be true local energy minima on the potential energy surface without imaginary frequencies. Total energy ( $E_0$ ) and zero-point energy (ZPE) were calculated with vibration frequencies analysis.

An isodesmic reaction processes is designed to screen the values of heat of formation for gas. So heats of formation of molecules can be given in terms of eq (1)<sup>2</sup>:

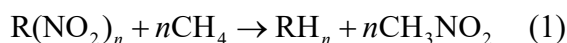

According to Hess' law of constant heat summation condensed-phase heats of formation can be determined.<sup>3</sup>

$$\Delta H(\text{solid}) = \Delta H(\text{gas}) - \Delta H(\text{sublimation}) \quad (2)$$

The enthalpy of sublimation can be represented as eq (3) and on the basis of the predicted electrostatic potential of a molecule.<sup>4</sup>

$$\Delta H(\text{sublimation}) = a(SA)^2 + b\sqrt{v\sigma_{\text{tot}}^2} + c \quad (3)$$

Here  $SA$  is the surface area of the 0.001 electrons bohr<sup>-3</sup> isosurface of the electronic density of the HEDMs,  $v\sigma_{\text{tot}}^2$  is derived from the molecular electrostatic potential calculation, and a, b, c are fitting parameters reported by Politzer et al.<sup>4a</sup>

**Table S37. *Ab initio* computational values of 10-15**

| Comp.     | $E_0$ /<br>a.u. | ZPE/<br>kJ mol <sup>-1</sup> | $H_T$ /<br>kJ mol <sup>-1</sup> | $\Delta H(\text{gas})$ /<br>kJ mol <sup>-1</sup> | $\Delta H(\text{sublimation})$ /<br>kJ mol <sup>-1</sup> | $\Delta H(\text{solid})$ /<br>kJ mol <sup>-1</sup> |
|-----------|-----------------|------------------------------|---------------------------------|--------------------------------------------------|----------------------------------------------------------|----------------------------------------------------|
| <b>10</b> | -1587.106971    | 398.52                       | 65.57                           | 734.11                                           | 217.44                                                   | 516.67                                             |
| <b>11</b> | -1747.538475    | 253.64                       | 54.25                           | 631.80                                           | 174.33                                                   | 457.47                                             |
| <b>12</b> | -1266.951699    | 248.28                       | 51.38                           | 645.93                                           | 166.18                                                   | 479.75                                             |
| <b>13</b> | -1343.343292    | 323.10                       | 53.99                           | 559.24                                           | 169.32                                                   | 389.92                                             |
| <b>14</b> | -1747.537170    | 253.16                       | 54.87                           | 635.37                                           | 178.99                                                   | 456.38                                             |
| <b>15</b> | -1157.444710    | 218.59                       | 49.07                           | 543.69                                           | 157.14                                                   | 386.55                                             |

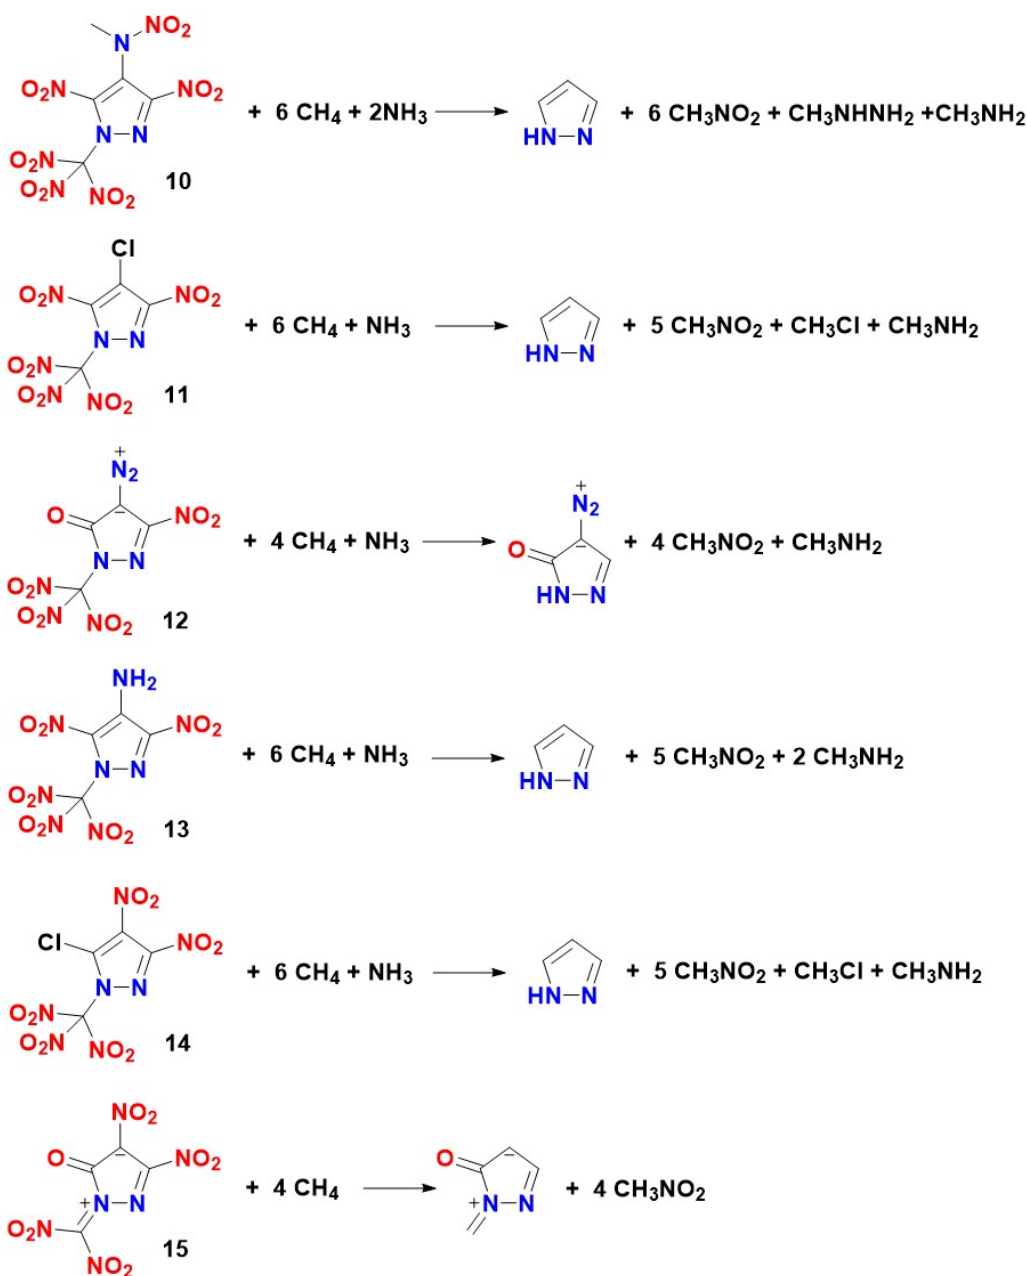

**Scheme S1.** Isodesmic reactions for **10-15**.

### 12.2 Caution!

Although we have not encountered any difficulties in preparing these new energetic materials, manipulations must be carried out by using standard safety precaution. Leather coat, ear protection, latex gloves, and face shield are strongly recommended for the experimental operation. All compounds should be handled with extreme care.

### 12.3 Characterization methods

All reagents and solvents were purchased from Energy Chemical, Sigma-Aldrich, and Aladdin as analytical grade and were used as received.  $^1\text{H}$  and  $^{13}\text{C}$  spectra were recorded using a 500 MHz (Bruker AVANCE III 500) nuclear magnetic resonance spectrometer

operating at 500 and 125.72 MHz, respectively. Chemical shifts in the  $^1\text{H}$  and  $^{13}\text{C}$  spectra are reported relative to  $\text{Me}_4\text{Si}$  as external standard. DSC plots were acquired on a differential scanning calorimeter (NETZSCH DSC 204 F1 Phoenix) at a scan rate of  $5\text{ }^\circ\text{C min}^{-1}$  in perforated Al containers under a nitrogen flow of  $60\text{ mL min}^{-1}$ . IR spectra were recorded on a Thermo Nicolet iS10 spectrometer equipped with a Thermo Scientific Smart iTR diamond ATR accessory. Elemental analyses were carried out on a vario EL III CHNOS elemental analyzer. Densities were measured at  $25\text{ }^\circ\text{C}$  with a Micromeritics AccuPyc II 1345 gas pycnometer. Impact and friction sensitivity measurements were made using a standard BAM Fallhammer and a BAM friction tester.

#### 12.4 X-ray crystallography

The single-crystal X-ray diffraction measurements for all the compounds were conducted on a Bruker Smart Apex II or Bruker D8 VENTURE diffractometer using Mo- $K\alpha$  radiation ( $\lambda = 0.71073\text{ \AA}$ ) with a graphite monochromator at 150-296 K. An Oxford Cobra low-temperature device was used to maintain the low temperature. Integration and scaling of intensity data was accomplished using the SAINT program<sup>5</sup>. The structures were solved by intrinsic using SHELXT2015<sup>6</sup> and refinement was carried out by a full-matrix least-squares technique using SHELXL2015<sup>7</sup>. The hydrogen atoms were refined isotropically, and the heavy atoms were refined anisotropically. N-H and O-H hydrogens were located from different electron density maps, and C-H hydrogens were placed in calculated positions and refined with a riding model. Data were corrected for the effects of absorption using SADABS<sup>8</sup>.

## References

1. M. J. Frisch, G. W. Trucks, H. B. Schlegel, G. E. Scuseria, M. A. Robb, J. R. Cheeseman, G. Scalmani, V. Barone, B. Mennucci, G. A. Petersson, H. Nakatsuji, M. Caricato, X. Li, H. P. Hratchian, A. F. Izmaylov, J. Bloino, G. Zheng, J. L. Sonnenberg, M. Hada, M. Ehara, K. Toyota, R. Fukuda, J. Hasegawa, M. Ishida, T. Nakajima, Y. Honda, O. Kitao, H. Nakai, T. Vreven, J. A. Montgomery, Jr., J. E. Peralta, F. Ogliaro, M. Bearpark, J. J. Heyd, E. Brothers, K. N. Kudin, V. N. Staroverov, R. Kobayashi, J. Normand, K. Raghavachari, A. Rendell, J. C. Burant, S. S. Iyengar, J. Tomasi, M. Cossi, N. Rega, J. M. Millam, M. Klene, J. E. Knox, J. B. Cross, V. Bakken, C. Adamo, J. Jaramillo, R. Gomperts, R. E. Stratmann, O. Yazyev, A. J. Austin, R. Cammi, C. Pomelli, J. W. Ochterski, R. L. Martin, K. Morokuma, V. G. Zakrzewski, G. A. Voth, P. Salvador, J. J. Dannenberg, S. Dapprich, A. D. Daniels, O. Farkas, J. B. Foresman, J. V. Ortiz, J. Cioslowski, and D. J. Fox, *Gaussian 09, Revision A.02*, Gaussian, Inc., Wallingford CT, 2009.
2. J. Zhang, H. Du, F. Wang, X. Gong and Y. Huang, *J. Phys. Chem. A*, 2011, **115**, 6617.
3. P. W. Atkins, *Physical Chemistry*, Oxford University Press, Oxford, U.K., 1982.
4. (a) P. Politzer, J. S. Murray, T. Brinck and P. Lane, *Immunoanalysis of Agrochemicals*, ACS Symposium Series 586, American Chemical Society, Washington, DC, 1994; (b) J. S. Murray, P. Politzer, *In Quantitative Treatment of Solute/ Solvent Interactions, Theoretical and Computational Chemistry*, Elsevier, Amsterdam, 1994.
5. Bruker, *SAINTE v8.34A*, Bruker AXS Inc., Madison, Wisconsin, USA, 2013.
6. G. M. Sheldrick, *Acta Cryst.*, 2015, **C71**, 3-8.
7. G. M. Sheldrick, *Acta Cryst.*, 2015, **A71**, 3-8.
8. Bruker, *SADABS v2014/5*, Bruker AXS Inc., Madison, Wisconsin, USA, 2014.
